# Supplementary material for: A U-shaped relationship between nighttime sleep duration and new-onset emotional, nervous, or psychiatric problems: a prospective cohort study from China
Source: Front Psychiatry. 2025 Jul 28;16:1609865. doi: 10.3389/fpsyt.2025.1609865 (PMC12337680; doi:10.3389/fpsyt.2025.1609865)
Supplement: Supplementary file 1 [file Table1.xlsx]

## Sheet: Sheet 1
id	emotional.problems	night sleep time(hour)	snap time(minute)	sex	age	marital_status	education	residence_place	smoke	drink	hypertension	DM	BMI	night_iqr	snap_iqr	nightQ	nightQ.median	snapQ	snapQ.median
094004113002	no	8	60	female	57	Married	High school	urban	Never	no	no	no	30.588	2.66667	1	Q3	8	Q3	60
094004111002	no	8	120	male	58	Married	High school	urban	Never	no	no	no	26.1391	2.66667	2	Q3	8	Q4	120
094004111001	no	6	10	female	57	Married	High school	urban	Never	no	no	no	30.7222	2	0.166667	Q2	6	Q3	60
094004112001	no	8	30	male	65	Married	High school	urban	Never	no	yes	no	27.2686	2.66667	0.5	Q3	8	Q3	60
094004118001	no	8	0	male	59	Married	High school	urban	Current	no	no	no	20.6515	2.66667	0	Q3	8	Q1	0
094004118002	no	7	0	female	59	Married	High school	urban	Never	no	yes	no	30.213	2.33333	0	Q3	8	Q1	0
094004121001	no	7	120	male	77	Married	High school	urban	Current	no	no	no	17.1194	2.33333	2	Q3	8	Q4	120
094004119002	no	6	120	male	77	Married	High school	urban	Never	no	no	no	25.4793	2	2	Q2	6	Q4	120
094004122001	no	5	0	male	47	Married	High school	urban	Current	>1m	no	yes	23.5822	1.66667	0	Q1	4	Q1	0
094004109001	no	7	40	female	53	Married	High school	urban	Never	no	yes	yes	26.1307	2.33333	0.666667	Q3	8	Q3	60
094004109002	no	6	60	male	66	Married	High school	urban	Never	<1m	no	no	30.2592	2	1	Q2	6	Q3	60
094004117002	no	8	0	male	75	Married	High school	urban	Never	no	yes	no	26.2917	2.66667	0	Q3	8	Q1	0
094004117001	no	7	0	female	73	Married	High school	urban	Never	no	no	no	21.1506	2.33333	0	Q3	8	Q1	0
094004107001	no	8	60	male	55	divorced	High school	urban	Current	>1m	yes	no	28.5992	2.66667	1	Q3	8	Q3	60
094004302002	no	6	60	male	51	Married	college and higher	urban	Current	>1m	yes	no	24.7091	2	1	Q2	6	Q3	60
094004308001	no	7	0	female	61	Non-married	High school	urban	Never	no	no	yes	20.5831	2.33333	0	Q3	8	Q1	0
094004303001	no	5	0	male	72	Married	High school	urban	Never	no	yes	no	24.3824	1.66667	0	Q1	4	Q1	0
094004303002	no	8	0	female	69	Married	High school	urban	Never	no	yes	yes	24.7018	2.66667	0	Q3	8	Q1	0
094004307001	no	7	60	male	69	Married	college and higher	urban	Current	no	no	no	27.1974	2.33333	1	Q3	8	Q3	60
094004307002	no	8	30	female	69	Married	college and higher	urban	Never	no	yes	no	28.6268	2.66667	0.5	Q3	8	Q3	60
094004309001	no	8	0	female	53	Non-married	High school	urban	Never	no	no	yes	31.2684	2.66667	0	Q3	8	Q1	0
094004219001	no	7	10	female	77	Married	High school	urban	Never	no	yes	no	30.4049	2.33333	0.166667	Q3	8	Q3	60
094004219002	no	6	60	male	82	Married	Elementary school and below	urban	Never	no	no	no	23.7167	2	1	Q2	6	Q3	60
094004220002	yes	5	0	male	71	Married	High school	urban	Former	<1m	no	no	26.0703	1.66667	0	Q1	4	Q1	0
094004220001	no	7	60	female	65	Married	college and higher	urban	Never	<1m	yes	yes	26.323	2.33333	1	Q3	8	Q3	60
094004210002	no	6	90	male	60	Married	High school	urban	Current	>1m	yes	yes	20.303	2	1.5	Q2	6	Q4	120
094004210001	no	5	50	female	60	Married	High school	urban	Never	no	yes	yes	37.8604	1.66667	0.833333	Q1	4	Q3	60
094004208002	no	8	65	female	82	Married	college and higher	urban	Never	no	yes	no	24.6924	2.66667	1.08333	Q3	8	Q4	120
094004208001	no	7	30	male	85	Married	college and higher	urban	Former	<1m	yes	no	22.2713	2.33333	0.5	Q3	8	Q3	60
094004214001	yes	7	40	female	78	Married	High school	urban	Never	no	yes	no	29.5838	2.33333	0.666667	Q3	8	Q3	60
094004216002	no	8	90	male	65	Married	Elementary school and below	urban	Current	>1m	yes	no	23.5894	2.66667	1.5	Q3	8	Q4	120
094004212002	no	6	0	female	64	Married	college and higher	urban	Never	no	yes	yes	21.6949	2	0	Q2	6	Q1	0
094004211001	no	7	60	female	52	Married	college and higher	urban	Never	>1m	yes	no	29.1382	2.33333	1	Q3	8	Q3	60
194037217001	no	6	0	male	60	Married	High school	urban	Never	no	yes	no	24.0918	2	0	Q2	6	Q1	0
194037205001	no	6	0	female	59	Married	Elementary school and below	urban	Never	no	no	no	21.9812	2	0	Q2	6	Q1	0
194037205002	no	7	60	male	59	Married	High school	urban	Never	no	no	no	24.0697	2.33333	1	Q3	8	Q3	60
194037219001	no	7	150	male	64	Married	Elementary school and below	urban	Current	no	no	yes	23.7389	2.33333	2.5	Q3	8	Q4	120
194037219002	no	5	0	female	62	Married	Elementary school and below	urban	Never	no	yes	no	27.1831	1.66667	0	Q1	4	Q1	0
194037214002	no	6	60	male	65	Married	college and higher	urban	Former	no	yes	no	24.0575	2	1	Q2	6	Q3	60
194037214001	no	6	30	female	64	Married	High school	urban	Never	no	no	yes	25.1324	2	0.5	Q2	6	Q3	60
194037206002	no	5	60	male	63	Married	college and higher	urban	Never	<1m	yes	no	26.7895	1.66667	1	Q1	4	Q3	60
194037206001	no	6.5	60	female	60	Married	High school	urban	Never	no	yes	no	21.7537	2.16667	1	Q2	6	Q3	60
194037204001	no	9	120	female	53	Married	High school	urban	Never	no	no	no	26.2581	3	2	Q4	9	Q4	120
194037333002	no	8	1	male	65	Married	Elementary school and below	urban	Former	no	yes	no	26.6909	2.66667	0.0166667	Q3	8	Q2	1
194037333001	no	8	0	female	66	Married	Elementary school and below	urban	Current	no	yes	no	18.9235	2.66667	0	Q3	8	Q1	0
194037320002	no	7	60	male	46	Married	High school	urban	Current	>1m	no	no	24.6664	2.33333	1	Q3	8	Q3	60
194037320001	no	7	60	female	45	Married	Elementary school and below	urban	Never	no	no	no	23.2003	2.33333	1	Q3	8	Q3	60
194037315002	no	6	0	male	74	Married	Elementary school and below	urban	Never	>1m	no	no	22.9544	2	0	Q2	6	Q1	0
194037311002	no	7	30	male	59	Married	Elementary school and below	urban	Current	>1m	no	no	22.5975	2.33333	0.5	Q3	8	Q3	60
194037310001	no	7	0	male	48	Married	High school	urban	Current	>1m	no	no	24.1273	2.33333	0	Q3	8	Q1	0
194037310002	no	7	20	female	46	Married	High school	urban	Never	no	no	no	24.5891	2.33333	0.333333	Q3	8	Q3	60
194037329001	no	8	75	female	73	Non-married	Elementary school and below	urban	Current	no	yes	yes	23.8041	2.66667	1.25	Q3	8	Q4	120
194037316001	no	7	0	male	59	Married	Elementary school and below	urban	Never	>1m	no	yes	24.0108	2.33333	0	Q3	8	Q1	0
194037316002	no	7	2	female	58	Married	Elementary school and below	urban	Current	no	no	yes	22.9587	2.33333	0.0333333	Q3	8	Q3	60
194037314001	no	7	10	male	52	Married	Elementary school and below	urban	Current	>1m	yes	no	23.1635	2.33333	0.166667	Q3	8	Q3	60
194037314002	no	6	0	female	49	Married	Elementary school and below	urban	Current	no	no	no	29.0773	2	0	Q2	6	Q1	0
194037321001	no	7	60	female	66	Married	Elementary school and below	urban	Never	no	yes	no	28.8156	2.33333	1	Q3	8	Q3	60
194037319001	no	6.5	0	male	57	Married	college and higher	urban	Current	no	no	no	23.8304	2.16667	0	Q2	6	Q1	0
194037319002	no	3	60	female	59	Married	High school	urban	Never	no	no	no	23.9853	1	1	Q1	4	Q3	60
194037306002	no	6	0	female	55	Married	Elementary school and below	urban	Never	no	no	no	24.5222	2	0	Q2	6	Q1	0
194037325002	no	8	75	male	45	Married	High school	urban	Current	>1m	yes	yes	21.3797	2.66667	1.25	Q3	8	Q4	120
194037308002	no	8	30	male	47	Married	High school	urban	Current	>1m	yes	yes	24.8464	2.66667	0.5	Q3	8	Q3	60
194037308001	no	8	30	female	47	Married	High school	urban	Never	<1m	no	no	24.2571	2.66667	0.5	Q3	8	Q3	60
194037326001	no	6	30	male	61	Married	Elementary school and below	urban	Current	>1m	yes	no	29.3772	2	0.5	Q2	6	Q3	60
194037326002	no	5	0	female	62	Married	Elementary school and below	urban	Never	no	yes	no	31.3273	1.66667	0	Q1	4	Q1	0
194037324001	no	6.5	120	male	57	Married	High school	urban	Former	no	no	no	22.6178	2.16667	2	Q2	6	Q4	120
194037324002	no	4.5	0	female	59	Married	Elementary school and below	urban	Current	no	yes	yes	39.4955	1.5	0	Q1	4	Q1	0
194037302002	no	8	2	male	53	Married	Elementary school and below	urban	Never	>1m	no	no	24.3658	2.66667	0.0333333	Q3	8	Q3	60
194037332001	no	8	0	male	54	Married	Elementary school and below	urban	Former	>1m	yes	yes	28.5693	2.66667	0	Q3	8	Q1	0
194037332002	no	7	0	female	54	Married	High school	urban	Never	no	no	yes	26.0993	2.33333	0	Q3	8	Q1	0
194037335002	no	7.5	0	male	49	Married	High school	urban	Never	>1m	no	yes	29.4164	2.5	0	Q3	8	Q1	0
194037335001	no	8	0	female	49	Married	High school	urban	Never	<1m	no	yes	25.4268	2.66667	0	Q3	8	Q1	0
194037330002	no	8	0	male	54	Married	Elementary school and below	urban	Current	no	no	no	24.0568	2.66667	0	Q3	8	Q1	0
194037330001	no	10	120	female	52	Married	High school	urban	Never	no	no	no	23.5172	3.33333	2	Q4	9	Q4	120
194037336001	no	6	1	male	74	Married	High school	urban	Current	no	yes	no	20.3876	2	0.0166667	Q2	6	Q2	1
194037336002	no	8	0	female	73	Married	Elementary school and below	urban	Former	no	no	no	28.2501	2.66667	0	Q3	8	Q1	0
194037338001	no	8	75	male	71	Married	Elementary school and below	urban	Never	<1m	yes	no	23.3225	2.66667	1.25	Q3	8	Q4	120
194037338002	no	8	60	female	68	Married	Elementary school and below	urban	Never	no	yes	no	21.243	2.66667	1	Q3	8	Q3	60
194037334001	no	8	1	male	62	Married	Elementary school and below	urban	Former	no	yes	no	26.4453	2.66667	0.0166667	Q3	8	Q2	1
194037334002	no	10	2	female	62	Married	Elementary school and below	urban	Never	no	no	no	28.2719	3.33333	0.0333333	Q4	9	Q3	60
194037318002	no	6	30	male	53	Married	Elementary school and below	urban	Current	no	no	no	27.0744	2	0.5	Q2	6	Q3	60
194037318001	no	7	0	female	53	Married	Elementary school and below	urban	Never	no	yes	no	24.6371	2.33333	0	Q3	8	Q1	0
194037303001	no	4.5	30	male	77	Non-married	Elementary school and below	urban	Current	no	yes	no	23.3103	1.5	0.5	Q1	4	Q3	60
194037312001	no	6.5	120	female	50	Non-married	High school	urban	Never	no	no	no	24.4062	2.16667	2	Q2	6	Q4	120
064028307001	no	7	0	female	55	divorced	High school	urban	Never	no	yes	no	20.3014	2.33333	0	Q3	8	Q1	0
064028301001	no	7	60	female	82	Non-married	Elementary school and below	urban	Never	no	yes	no	16.7408	2.33333	1	Q3	8	Q3	60
064028101002	no	6	60	female	68	Married	High school	urban	Never	no	yes	yes	25.7367	2	1	Q2	6	Q3	60
064028108002	no	7	30	female	48	Married	High school	urban	Never	no	no	no	26.4573	2.33333	0.5	Q3	8	Q3	60
064028102001	no	8	40	female	68	Non-married	High school	urban	Never	no	no	no	26.6022	2.66667	0.666667	Q3	8	Q3	60
064028117002	no	7	60	female	51	Married	college and higher	urban	Never	no	no	no	25.0885	2.33333	1	Q3	8	Q3	60
064028103002	no	7	60	male	55	Married	High school	urban	Current	no	no	no	21.203	2.33333	1	Q3	8	Q3	60
064028103001	no	7	60	female	55	Married	High school	urban	Never	no	no	no	28.4166	2.33333	1	Q3	8	Q3	60
064028115001	no	7	0	female	71	Married	Elementary school and below	urban	Never	no	yes	no	41.9111	2.33333	0	Q3	8	Q1	0
064028112001	no	10	90	male	71	Married	High school	urban	Former	>1m	yes	no	27.4984	3.33333	1.5	Q4	9	Q4	120
064028112002	no	7	60	female	66	Married	High school	urban	Never	no	yes	no	28.5899	2.33333	1	Q3	8	Q3	60
064028104001	no	7	60	male	49	Married	college and higher	urban	Never	>1m	no	no	27.5482	2.33333	1	Q3	8	Q3	60
064028104002	no	7	60	female	48	Married	college and higher	urban	Never	no	no	no	24.6533	2.33333	1	Q3	8	Q3	60
064028113002	no	7	0	female	52	Married	High school	urban	Never	<1m	no	no	21.4903	2.33333	0	Q3	8	Q1	0
064028208002	no	7	30	female	54	Married	High school	urban	Never	no	yes	no	25.1157	2.33333	0.5	Q3	8	Q3	60
064028208001	no	7	30	male	54	Married	High school	urban	Current	no	no	no	26.215	2.33333	0.5	Q3	8	Q3	60
064028218002	no	6	60	male	48	Married	High school	urban	Current	>1m	yes	no	25.2941	2	1	Q2	6	Q3	60
064028218001	no	7	0	female	46	Married	High school	urban	Never	no	no	no	22.4833	2.33333	0	Q3	8	Q1	0
064028217001	no	6	30	female	53	Married	High school	urban	Never	no	no	no	28.1266	2	0.5	Q2	6	Q3	60
064028203001	no	6	30	female	49	Married	High school	urban	Never	no	no	yes	25.1303	2	0.5	Q2	6	Q3	60
064028221002	no	8	60	male	46	Married	High school	urban	Never	no	no	no	23.5429	2.66667	1	Q3	8	Q3	60
064028220001	no	7	30	male	48	divorced	High school	urban	Former	no	no	no	26.1224	2.33333	0.5	Q3	8	Q3	60
064028210001	yes	7	30	male	55	Married	High school	urban	Current	no	no	no	25.3307	2.33333	0.5	Q3	8	Q3	60
064028206001	no	6	40	female	54	Non-married	High school	urban	Never	no	no	no	28.481	2	0.666667	Q2	6	Q3	60
064028216001	no	7	60	female	58	divorced	High school	urban	Never	no	no	no	24.2722	2.33333	1	Q3	8	Q3	60
064033321001	no	8	2	male	56	Married	High school	rural	Current	<1m	no	no	25.3218	2.66667	0.0333333	Q3	8	Q3	60
064033321002	no	8	2	female	55	Married	Elementary school and below	rural	Never	no	yes	no	27.8343	2.66667	0.0333333	Q3	8	Q3	60
064033327001	no	7	1	male	61	Married	Elementary school and below	rural	Never	no	no	no	19.5265	2.33333	0.0166667	Q3	8	Q2	1
064033325002	no	8	2	female	56	Married	Elementary school and below	rural	Never	no	no	no	22.6566	2.66667	0.0333333	Q3	8	Q3	60
064033322001	no	6	1	male	59	Married	Elementary school and below	rural	Never	<1m	no	no	23.737	2	0.0166667	Q2	6	Q2	1
064033330002	no	5	1	male	55	Married	High school	rural	Current	<1m	yes	no	22.8187	1.66667	0.0166667	Q1	4	Q2	1
064033330001	no	6	2	female	53	Married	High school	rural	Never	no	yes	no	24.7456	2	0.0333333	Q2	6	Q3	60
064033324001	no	3	0	female	58	Married	Elementary school and below	rural	Never	no	no	no	26.83	1	0	Q1	4	Q1	0
064033333001	no	5	1	male	48	divorced	High school	rural	Current	>1m	no	no	22.5756	1.66667	0.0166667	Q1	4	Q2	1
064033306002	no	7	1	male	54	Married	college and higher	rural	Current	<1m	yes	no	25.2469	2.33333	0.0166667	Q3	8	Q2	1
064033301002	no	8	1	male	62	Married	Elementary school and below	rural	Current	<1m	yes	no	28.0624	2.66667	0.0166667	Q3	8	Q2	1
064033331002	no	8	1	male	57	Married	Elementary school and below	rural	Never	no	yes	no	24.8443	2.66667	0.0166667	Q3	8	Q2	1
064033331001	no	5	0	female	55	Married	High school	rural	Never	no	yes	no	23.3293	1.66667	0	Q1	4	Q1	0
064033304001	no	1	60	female	58	Married	Elementary school and below	rural	Never	no	yes	no	28.3217	0.333333	1	Q1	4	Q3	60
064033307001	no	6	2	male	49	divorced	High school	rural	Current	<1m	yes	no	28.8407	2	0.0333333	Q2	6	Q3	60
064033326001	no	7	2	male	63	Married	Elementary school and below	rural	Current	no	yes	no	27.5374	2.33333	0.0333333	Q3	8	Q3	60
064033319002	no	5	60	male	66	Married	High school	rural	Never	<1m	no	no	24.6671	1.66667	1	Q1	4	Q3	60
064033313002	no	7	2	male	49	Married	Elementary school and below	rural	Current	no	no	no	23.1877	2.33333	0.0333333	Q3	8	Q3	60
064033313001	no	6	1	female	49	Married	High school	rural	Never	no	yes	no	26.3836	2	0.0166667	Q2	6	Q2	1
064033314002	no	6	120	male	54	Married	Elementary school and below	rural	Current	no	yes	no	20.346	2	2	Q2	6	Q4	120
064033314001	no	8	120	female	46	Married	Elementary school and below	rural	Never	no	yes	no	23.8141	2.66667	2	Q3	8	Q4	120
064033318001	no	8	120	male	51	Married	High school	rural	Current	no	yes	no	23.1834	2.66667	2	Q3	8	Q4	120
064033318002	no	6	0	female	51	Married	High school	rural	Never	no	no	no	30.7422	2	0	Q2	6	Q1	0
064033328001	no	7	2	male	50	Married	High school	rural	Current	>1m	yes	no	20.1532	2.33333	0.0333333	Q3	8	Q3	60
064033328002	no	6	0	female	49	Married	High school	rural	Never	no	no	no	23.0529	2	0	Q2	6	Q1	0
064033317001	no	6	60	male	71	Non-married	Elementary school and below	rural	Former	>1m	yes	no	21.9098	2	1	Q2	6	Q3	60
064033309001	no	8	120	male	55	Married	High school	rural	Former	no	yes	no	25.6055	2.66667	2	Q3	8	Q4	120
064033309002	no	8	0	female	55	Married	Elementary school and below	rural	Never	no	no	no	24.0715	2.66667	0	Q3	8	Q1	0
064033329002	no	6	60	male	61	Married	Elementary school and below	rural	Current	<1m	yes	no	26.9549	2	1	Q2	6	Q3	60
064033312001	no	6	120	male	69	Married	Elementary school and below	rural	Current	no	yes	no	21.4268	2	2	Q2	6	Q4	120
064033312002	no	5	60	female	62	Married	Elementary school and below	rural	Never	no	yes	no	25.2616	1.66667	1	Q1	4	Q3	60
064033311001	no	5	60	female	52	Married	High school	rural	Never	no	yes	no	27.0882	1.66667	1	Q1	4	Q3	60
064033332001	no	7	30	female	45	Married	High school	rural	Never	>1m	no	no	23.6696	2.33333	0.5	Q3	8	Q3	60
064033310001	no	7	180	female	45	Married	Elementary school and below	rural	Never	>1m	yes	no	23.3083	2.33333	3	Q3	8	Q4	120
064033221001	no	5	20	male	64	Married	Elementary school and below	rural	Never	>1m	no	no	21.0376	1.66667	0.333333	Q1	4	Q3	60
064033221002	no	6	60	female	64	Married	Elementary school and below	rural	Never	<1m	yes	no	31.3666	2	1	Q2	6	Q3	60
064033223002	no	5	90	male	57	Married	High school	rural	Former	no	no	no	27.9967	1.66667	1.5	Q1	4	Q4	120
064033223001	no	8	90	female	53	Married	Elementary school and below	rural	Never	no	yes	no	26.9372	2.66667	1.5	Q3	8	Q4	120
064033212001	no	8	120	male	65	Married	Elementary school and below	rural	Never	<1m	no	no	23.7891	2.66667	2	Q3	8	Q4	120
064033219001	no	5	0	male	45	Married	High school	rural	Former	no	no	no	24.9991	1.66667	0	Q1	4	Q1	0
064033213002	no	7	120	female	54	Married	Elementary school and below	rural	Never	no	yes	no	32.2996	2.33333	2	Q3	8	Q4	120
064033213001	no	6	180	male	52	Married	High school	rural	Current	>1m	yes	no	22.9539	2	3	Q2	6	Q4	120
064033201002	no	5	60	male	67	Married	Elementary school and below	rural	Former	>1m	no	no	24.3526	1.66667	1	Q1	4	Q3	60
064033201001	no	2	0	female	64	Married	Elementary school and below	rural	Never	no	yes	no	22.7482	0.666667	0	Q1	4	Q1	0
064033208001	no	7	120	female	48	Married	High school	rural	Never	no	yes	no	27.9434	2.33333	2	Q3	8	Q4	120
064033203001	no	6	2	female	65	Married	High school	rural	Never	no	yes	yes	16.5289	2	0.0333333	Q2	6	Q3	60
064033209002	no	6	120	male	51	Married	High school	rural	Never	no	no	no	24.7332	2	2	Q2	6	Q4	120
064033209001	no	8	60	female	50	Married	High school	rural	Never	no	no	no	24.4564	2.66667	1	Q3	8	Q3	60
064033206001	no	5	60	female	55	Non-married	Elementary school and below	rural	Never	no	no	no	25.0204	1.66667	1	Q1	4	Q3	60
064033220002	no	8	120	male	54	Married	High school	rural	Current	no	no	no	56.4374	2.66667	2	Q3	8	Q4	120
064033220001	no	4	0	female	52	Married	High school	rural	Never	no	no	yes	24.0892	1.33333	0	Q1	4	Q1	0
064033210002	no	7	1	male	53	Married	High school	rural	Former	no	yes	no	33.126	2.33333	0.0166667	Q3	8	Q2	1
064033210001	no	7	1	female	53	Married	High school	rural	Never	no	no	no	24.6519	2.33333	0.0166667	Q3	8	Q2	1
064033217002	no	8	60	male	56	Married	High school	rural	Current	>1m	yes	no	19.8757	2.66667	1	Q3	8	Q3	60
064033217001	no	7	60	female	57	Married	Elementary school and below	rural	Never	no	yes	no	22.1446	2.33333	1	Q3	8	Q3	60
064033211002	yes	7	1	female	52	Married	High school	rural	Never	no	yes	no	23.777	2.33333	0.0166667	Q3	8	Q2	1
064033224001	no	6	0	male	55	Married	High school	rural	Never	no	no	no	26.2687	2	0	Q2	6	Q1	0
064033224002	no	8	1	female	55	Married	High school	rural	Never	>1m	no	no	31.5652	2.66667	0.0166667	Q3	8	Q2	1
064033216002	no	6	1	male	51	Married	High school	rural	Current	>1m	no	no	26.9402	2	0.0166667	Q2	6	Q2	1
064033216001	no	7	1	female	51	Married	High school	rural	Never	no	yes	no	25.4501	2.33333	0.0166667	Q3	8	Q2	1
064033202001	no	8	2	male	82	Non-married	Elementary school and below	rural	Never	no	yes	no	19.9286	2.66667	0.0333333	Q3	8	Q3	60
064033218001	no	6	120	male	55	Married	High school	rural	Current	>1m	no	no	21.358	2	2	Q2	6	Q4	120
064033218002	no	9	120	female	53	Married	Elementary school and below	rural	Never	no	yes	no	24.3913	3	2	Q4	9	Q4	120
064033214001	no	10	2	male	48	Married	High school	rural	Never	<1m	no	no	30.4367	3.33333	0.0333333	Q4	9	Q3	60
064033214002	no	8	2	female	48	Married	High school	rural	Never	no	no	no	23.2335	2.66667	0.0333333	Q3	8	Q3	60
064033222001	no	7	60	male	58	Married	Elementary school and below	rural	Never	no	yes	no	24.2722	2.33333	1	Q3	8	Q3	60
064033222002	no	6	0	female	62	Married	Elementary school and below	rural	Never	no	yes	no	36.6886	2	0	Q2	6	Q1	0
064033204002	no	6	0	male	58	Married	Elementary school and below	rural	Never	<1m	no	no	19.9622	2	0	Q2	6	Q1	0
064033108001	no	8	120	male	65	Non-married	High school	rural	Current	<1m	yes	no	23.3507	2.66667	2	Q3	8	Q4	120
064033120001	no	8	120	male	51	Married	High school	rural	Never	>1m	yes	yes	26.2584	2.66667	2	Q3	8	Q4	120
064033120002	no	6	30	female	48	Married	High school	rural	Never	no	yes	no	26.1268	2	0.5	Q2	6	Q3	60
064033123002	no	6	60	male	56	Married	High school	rural	Current	<1m	no	no	20.3359	2	1	Q2	6	Q3	60
064033119002	no	10	120	male	52	Married	Elementary school and below	rural	Current	>1m	no	no	21.5684	3.33333	2	Q4	9	Q4	120
064033109002	no	10	30	male	45	Married	High school	rural	Current	>1m	yes	no	21.6995	3.33333	0.5	Q4	9	Q3	60
064033109001	no	8	0	female	45	Married	High school	rural	Never	no	no	no	28.7229	2.66667	0	Q3	8	Q1	0
064033117002	no	8	120	male	58	Married	High school	rural	Former	>1m	yes	no	27.4286	2.66667	2	Q3	8	Q4	120
064033117001	no	8	0	female	58	Married	Elementary school and below	rural	Never	no	yes	no	30.8639	2.66667	0	Q3	8	Q1	0
064033106001	no	10	180	male	46	Married	Elementary school and below	rural	Current	<1m	yes	yes	23.1907	3.33333	3	Q4	9	Q4	120
064033116002	no	8	30	female	74	Married	Elementary school and below	rural	Former	>1m	yes	yes	17.4429	2.66667	0.5	Q3	8	Q3	60
064033101001	no	6	60	female	57	Non-married	Elementary school and below	rural	Never	no	no	no	27.9172	2	1	Q2	6	Q3	60
064033124002	no	5	120	female	63	Married	Elementary school and below	rural	Never	no	yes	no	26.4024	1.66667	2	Q1	4	Q4	120
064033102002	no	8	2	male	50	Married	High school	rural	Never	no	yes	yes	27.7177	2.66667	0.0333333	Q3	8	Q3	60
064033102001	no	8	1	female	50	Married	Elementary school and below	rural	Never	no	yes	no	20.9902	2.66667	0.0166667	Q3	8	Q2	1
064033125001	no	8	3	male	49	Married	Elementary school and below	rural	Current	no	no	no	19.4385	2.66667	0.05	Q3	8	Q3	60
064033125002	no	10	2	female	48	Married	Elementary school and below	rural	Never	no	yes	no	35.7349	3.33333	0.0333333	Q4	9	Q3	60
064033126002	no	7	2	male	59	Married	Elementary school and below	rural	Never	no	yes	yes	30.1931	2.33333	0.0333333	Q3	8	Q3	60
064033114002	no	7.5	0	male	67	Married	High school	rural	Current	no	yes	no	25.142	2.5	0	Q3	8	Q1	0
064033114001	no	6	0	female	62	Married	Elementary school and below	rural	Never	no	yes	no	28.0497	2	0	Q2	6	Q1	0
064033113002	no	7	3	female	57	Married	Elementary school and below	rural	Never	no	yes	no	27.2106	2.33333	0.05	Q3	8	Q3	60
064033118001	no	8	2	female	64	Non-married	Elementary school and below	rural	Never	no	yes	no	22.0741	2.66667	0.0333333	Q3	8	Q3	60
064033112002	no	8	2	male	59	Married	High school	rural	Current	>1m	no	no	25.5497	2.66667	0.0333333	Q3	8	Q3	60
064033112001	no	8	0	female	57	Married	Elementary school and below	rural	Never	no	no	no	26.4015	2.66667	0	Q3	8	Q1	0
064033115002	no	8	2	male	57	Married	High school	rural	Current	<1m	no	yes	23.8803	2.66667	0.0333333	Q3	8	Q3	60
064033115001	no	8	1	female	55	Married	Elementary school and below	rural	Never	no	no	no	21.3599	2.66667	0.0166667	Q3	8	Q2	1
064033104001	no	8	180	male	58	Married	High school	rural	Current	>1m	no	no	24.6877	2.66667	3	Q3	8	Q4	120
064033104002	no	7	0	female	56	Married	High school	rural	Never	no	yes	no	25.094	2.33333	0	Q3	8	Q1	0
064033105001	no	5	2	male	57	Married	High school	rural	Current	<1m	yes	no	24.539	1.66667	0.0333333	Q1	4	Q3	60
064033107002	no	6	0	male	68	Married	High school	rural	Never	no	no	no	16.3847	2	0	Q2	6	Q1	0
060481308001	no	7	120	male	47	Married	Elementary school and below	rural	Current	<1m	yes	no	20.8532	2.33333	2	Q3	8	Q4	120
060481308002	no	7	60	female	49	Married	High school	rural	Never	no	yes	no	26.9409	2.33333	1	Q3	8	Q3	60
060481310001	no	5	0	female	67	Married	High school	rural	Never	no	no	no	24.717	1.66667	0	Q1	4	Q1	0
060481301002	no	8	120	male	62	Married	Elementary school and below	rural	Never	no	yes	no	28.435	2.66667	2	Q3	8	Q4	120
060481301001	yes	7	60	female	61	Married	Elementary school and below	rural	Never	no	yes	no	23.3534	2.33333	1	Q3	8	Q3	60
060481312001	no	3	0	male	49	Married	High school	rural	Never	>1m	yes	no	32.9415	1	0	Q1	4	Q1	0
060481312002	no	8	0	female	48	Married	Elementary school and below	rural	Former	no	no	no	26.2767	2.66667	0	Q3	8	Q1	0
060481322002	no	6	0	male	64	Married	High school	rural	Current	no	no	no	28.8881	2	0	Q2	6	Q1	0
060481322001	no	5	60	female	67	Married	Elementary school and below	rural	Never	no	yes	yes	27.5932	1.66667	1	Q1	4	Q3	60
060481303002	no	6	0	male	48	Married	High school	rural	Never	no	no	no	21.6449	2	0	Q2	6	Q1	0
060481303001	no	7	60	female	45	Married	High school	rural	Never	no	no	no	24.453	2.33333	1	Q3	8	Q3	60
060481307002	no	9	60	male	57	Married	Elementary school and below	rural	Former	>1m	yes	no	28.959	3	1	Q4	9	Q3	60
060481307001	no	10	0	female	53	Married	Elementary school and below	rural	Never	no	no	yes	23.8088	3.33333	0	Q4	9	Q1	0
060481320001	no	6	60	male	49	Married	Elementary school and below	rural	Former	>1m	no	no	20.8152	2	1	Q2	6	Q3	60
060481320002	no	7	60	female	50	Married	High school	rural	Never	no	no	no	26.0936	2.33333	1	Q3	8	Q3	60
060481302001	no	6	60	male	49	Non-married	Elementary school and below	rural	Current	>1m	no	no	22.9946	2	1	Q2	6	Q3	60
060481313001	no	10	100	male	47	Married	High school	rural	Former	no	no	no	28.9842	3.33333	1.66667	Q4	9	Q4	120
060481313002	no	8	0	female	47	Married	Elementary school and below	rural	Never	no	no	no	20.2872	2.66667	0	Q3	8	Q1	0
060481316002	no	8	100	male	61	Married	Elementary school and below	rural	Current	>1m	no	no	19.5776	2.66667	1.66667	Q3	8	Q4	120
060481316001	no	7	0	female	62	Married	Elementary school and below	rural	Never	no	yes	yes	28.7698	2.33333	0	Q3	8	Q1	0
060481323001	no	5	0	female	80	Non-married	Elementary school and below	rural	Never	no	yes	no	17.002	1.66667	0	Q1	4	Q1	0
060481321001	no	10	120	male	58	Married	Elementary school and below	rural	Never	no	yes	no	28.6541	3.33333	2	Q4	9	Q4	120
060481321002	no	8	60	female	56	Married	Elementary school and below	rural	Never	no	yes	no	26.5161	2.66667	1	Q3	8	Q3	60
060481305001	no	7	120	male	87	Married	High school	rural	Former	>1m	no	yes	21.358	2.33333	2	Q3	8	Q4	120
060481319001	no	8	120	female	63	Married	High school	rural	Never	no	yes	no	20.2538	2.66667	2	Q3	8	Q4	120
060481311001	no	6	90	male	47	Married	High school	rural	Current	>1m	no	yes	27.7111	2	1.5	Q2	6	Q4	120
060481311002	no	6	0	female	48	Married	High school	rural	Never	no	yes	no	27.2874	2	0	Q2	6	Q1	0
060481324002	no	5	60	male	61	Married	High school	rural	Former	>1m	yes	no	27.9302	1.66667	1	Q1	4	Q3	60
060481324001	no	10	60	female	60	Married	Elementary school and below	rural	Never	no	yes	no	34.065	3.33333	1	Q4	9	Q3	60
060481132002	no	8	60	male	46	Married	High school	rural	Never	<1m	no	no	18.0079	2.66667	1	Q3	8	Q3	60
060481132001	no	7	60	female	46	Married	High school	rural	Never	no	yes	no	21.6464	2.33333	1	Q3	8	Q3	60
060481102001	no	7	120	male	58	Married	High school	rural	Current	no	yes	no	26.2066	2.33333	2	Q3	8	Q4	120
060481102002	no	7	0	female	48	Married	Elementary school and below	rural	Never	no	yes	no	27.3333	2.33333	0	Q3	8	Q1	0
060481118001	no	4	0	female	59	Non-married	High school	rural	Never	no	no	no	22.607	1.33333	0	Q1	4	Q1	0
060481109002	no	7	120	male	51	Married	High school	rural	Current	>1m	yes	no	25.2504	2.33333	2	Q3	8	Q4	120
060481109001	no	6	60	female	53	Married	High school	rural	Never	no	no	no	34.6396	2	1	Q2	6	Q3	60
060481111002	no	5	0	male	48	Married	High school	rural	Never	no	no	no	19.9357	1.66667	0	Q1	4	Q1	0
060481111001	no	7	0	female	48	Married	High school	rural	Never	no	no	no	25.8314	2.33333	0	Q3	8	Q1	0
060481101002	no	7	30	male	59	Married	Elementary school and below	rural	Current	no	yes	yes	24.649	2.33333	0.5	Q3	8	Q3	60
060481101001	no	7	0	female	57	Married	High school	rural	Never	no	no	no	22.5861	2.33333	0	Q3	8	Q1	0
060481125002	no	7	120	male	54	Married	High school	rural	Current	no	no	no	22.69	2.33333	2	Q3	8	Q4	120
060481125001	no	7	0	female	55	Married	High school	rural	Never	no	no	no	27.8307	2.33333	0	Q3	8	Q1	0
060481107002	no	7	0	female	59	Married	Elementary school and below	rural	Never	no	no	no	24.7246	2.33333	0	Q3	8	Q1	0
060481114001	no	5	60	female	68	Married	High school	rural	Never	no	no	no	28.5232	1.66667	1	Q1	4	Q3	60
060481128002	no	7	60	male	47	Married	High school	rural	Never	<1m	no	no	25.026	2.33333	1	Q3	8	Q3	60
060481128001	no	7	0	female	49	Married	High school	rural	Never	no	yes	yes	37.5988	2.33333	0	Q3	8	Q1	0
060481104002	no	6	60	male	63	Married	Elementary school and below	rural	Former	<1m	no	no	25.6661	2	1	Q2	6	Q3	60
060481108002	no	6	60	male	59	Married	High school	rural	Current	>1m	no	no	26.474	2	1	Q2	6	Q3	60
060481108001	no	6	120	female	57	Married	Elementary school and below	rural	Never	no	yes	yes	21.512	2	2	Q2	6	Q4	120
060481123001	no	2	0	female	69	Non-married	Elementary school and below	rural	Never	no	yes	no	22.8862	0.666667	0	Q1	4	Q1	0
060481124001	no	5	30	male	49	Married	High school	rural	Current	no	yes	no	25.9444	1.66667	0.5	Q1	4	Q3	60
060481124002	no	3	60	female	49	Married	Elementary school and below	rural	Never	no	yes	no	26.6547	1	1	Q1	4	Q3	60
060481120001	no	7	30	male	47	Non-married	Elementary school and below	rural	Current	<1m	yes	no	27.5374	2.33333	0.5	Q3	8	Q3	60
060481112001	no	7	0	male	58	Married	High school	rural	Current	no	yes	no	24.6166	2.33333	0	Q3	8	Q1	0
060481112002	no	7	30	female	60	Married	Elementary school and below	rural	Never	no	yes	yes	33.142	2.33333	0.5	Q3	8	Q3	60
060481133002	no	5	120	male	63	Married	Elementary school and below	rural	Current	>1m	yes	no	24.765	1.66667	2	Q1	4	Q4	120
060481133001	no	7	60	female	65	Married	Elementary school and below	rural	Never	no	yes	no	26.1698	2.33333	1	Q3	8	Q3	60
060481110001	no	7	120	male	48	Married	High school	rural	Current	<1m	no	no	24.6349	2.33333	2	Q3	8	Q4	120
060481110002	no	7	30	female	49	Married	High school	rural	Never	no	no	no	28.6028	2.33333	0.5	Q3	8	Q3	60
060481122002	no	8	30	male	51	Married	High school	rural	Never	no	no	no	27.6587	2.66667	0.5	Q3	8	Q3	60
060481122001	no	7	30	female	54	Married	Elementary school and below	rural	Never	no	yes	no	23.7079	2.33333	0.5	Q3	8	Q3	60
060481119001	no	5	0	male	60	Married	High school	rural	Current	<1m	no	no	22.8982	1.66667	0	Q1	4	Q1	0
060481119002	no	6	60	female	58	Married	Elementary school and below	rural	Never	no	yes	no	25.6386	2	1	Q2	6	Q3	60
060481130001	no	7	0	female	64	Married	Elementary school and below	rural	Never	no	yes	yes	21.5888	2.33333	0	Q3	8	Q1	0
060481106001	no	8	0	male	59	Married	Elementary school and below	rural	Current	no	yes	no	19.9515	2.66667	0	Q3	8	Q1	0
060481106002	no	6	60	female	59	Married	Elementary school and below	rural	Never	no	no	yes	19.7976	2	1	Q2	6	Q3	60
060481127001	no	6	90	male	49	Married	High school	rural	Current	no	yes	no	27.055	2	1.5	Q2	6	Q4	120
060481127002	no	5	60	female	51	Married	High school	rural	Never	no	yes	no	24.4062	1.66667	1	Q1	4	Q3	60
060481117001	no	6	60	male	56	Married	Elementary school and below	rural	Current	no	yes	no	28.0402	2	1	Q2	6	Q3	60
060481117002	no	6	0	female	56	Married	Elementary school and below	rural	Never	no	yes	no	29.1859	2	0	Q2	6	Q1	0
060481129001	no	6	60	female	64	Married	High school	rural	Never	no	no	no	32.4438	2	1	Q2	6	Q3	60
060481121001	no	5	30	male	64	Non-married	Elementary school and below	rural	Current	no	yes	no	22.4061	1.66667	0.5	Q1	4	Q3	60
060481126002	no	7	0	male	53	Married	High school	rural	Current	no	no	yes	27.8893	2.33333	0	Q3	8	Q1	0
060481126001	no	6	0	female	55	Married	High school	rural	Never	no	no	no	22.9711	2	0	Q2	6	Q1	0
060481135002	no	6	30	male	45	Married	Elementary school and below	rural	Former	>1m	no	no	26.3117	2	0.5	Q2	6	Q3	60
060481105001	no	5	0	female	62	Married	Elementary school and below	rural	Never	no	no	no	23.254	1.66667	0	Q1	4	Q1	0
060481134001	no	5	0	male	49	Married	High school	rural	Current	no	yes	no	28.2007	1.66667	0	Q1	4	Q1	0
060481134002	no	8	100	female	51	Married	High school	rural	Never	no	no	no	32.1951	2.66667	1.66667	Q3	8	Q4	120
060481131002	no	6	120	male	60	Married	Elementary school and below	rural	Current	<1m	yes	no	30.4127	2	2	Q2	6	Q4	120
060481131001	no	8	0	female	56	Married	Elementary school and below	rural	Never	no	no	no	23.2032	2.66667	0	Q3	8	Q1	0
060481115001	no	3	60	female	54	Married	Elementary school and below	rural	Never	no	yes	no	25.1769	1	1	Q1	4	Q3	60
060481113002	no	6	60	male	46	Married	High school	rural	Current	>1m	no	no	25.7499	2	1	Q2	6	Q3	60
060481113001	no	7	0	female	45	Married	Elementary school and below	rural	Never	no	no	no	19.1948	2.33333	0	Q3	8	Q1	0
060481116001	no	6	0	male	47	Non-married	High school	rural	Current	no	no	no	22.0734	2	0	Q2	6	Q1	0
060481208001	no	8	60	male	60	Married	High school	rural	Former	>1m	no	no	20.2076	2.66667	1	Q3	8	Q3	60
060481208002	no	6	0	female	60	Married	Elementary school and below	rural	Never	no	yes	no	31.1247	2	0	Q2	6	Q1	0
060481230001	no	6	60	male	64	Married	High school	rural	Current	>1m	no	no	26.1258	2	1	Q2	6	Q3	60
060481230002	no	9	0	female	61	Married	Elementary school and below	rural	Never	no	yes	no	25.9109	3	0	Q4	9	Q1	0
060481219001	no	7	0	male	57	Married	High school	rural	Current	no	no	no	23.7563	2.33333	0	Q3	8	Q1	0
060481219002	no	7	0	female	55	Married	Elementary school and below	rural	Never	no	yes	no	24.0893	2.33333	0	Q3	8	Q1	0
060481223002	no	6	100	male	56	Married	High school	rural	Former	<1m	no	no	24.1991	2	1.66667	Q2	6	Q4	120
060481223001	no	6	0	female	54	Married	Elementary school and below	rural	Never	no	yes	no	20.0367	2	0	Q2	6	Q1	0
060481217002	no	7	120	male	64	Married	Elementary school and below	rural	Former	>1m	yes	yes	28.0378	2.33333	2	Q3	8	Q4	120
060481217001	no	4	30	female	54	Married	Elementary school and below	rural	Never	no	no	no	21.4567	1.33333	0.5	Q1	4	Q3	60
060481212002	no	9	120	male	62	Married	High school	rural	Never	no	no	no	25.1331	3	2	Q4	9	Q4	120
060481212001	no	8	0	female	63	Married	High school	rural	Never	no	yes	no	38.0703	2.66667	0	Q3	8	Q1	0
060481218002	no	6	120	female	65	Married	Elementary school and below	rural	Never	no	no	no	20.7294	2	2	Q2	6	Q4	120
060481234001	no	7	60	male	70	Married	High school	rural	Current	<1m	yes	no	24.3227	2.33333	1	Q3	8	Q3	60
060481234002	no	10	60	female	69	Married	High school	rural	Never	no	yes	no	32.7628	3.33333	1	Q4	9	Q3	60
060481205002	no	8	0	male	53	Married	Elementary school and below	rural	Former	no	yes	no	26.6334	2.66667	0	Q3	8	Q1	0
060481205001	no	5	0	female	51	Married	Elementary school and below	rural	Never	no	no	no	24.9559	1.66667	0	Q1	4	Q1	0
060481224001	no	8	60	male	54	Married	High school	rural	Former	>1m	yes	no	33.0465	2.66667	1	Q3	8	Q3	60
060481224002	no	8	60	female	56	Married	Elementary school and below	rural	Never	no	no	no	26.8215	2.66667	1	Q3	8	Q3	60
060481207001	no	7	0	male	52	Married	High school	rural	Current	>1m	no	no	22.2851	2.33333	0	Q3	8	Q1	0
060481207002	no	8	0	female	55	Married	Elementary school and below	rural	Never	no	yes	yes	18.7645	2.66667	0	Q3	8	Q1	0
060481222002	no	7	0	male	62	Married	Elementary school and below	rural	Former	no	yes	no	25.1706	2.33333	0	Q3	8	Q1	0
060481222001	no	5	0	female	58	Married	Elementary school and below	rural	Never	no	no	no	23.7703	1.66667	0	Q1	4	Q1	0
060481231001	no	7	60	male	52	Married	High school	rural	Never	<1m	no	no	25.3015	2.33333	1	Q3	8	Q3	60
060481231002	no	5	30	female	55	Married	High school	rural	Never	no	yes	no	21.6921	1.66667	0.5	Q1	4	Q3	60
060481226001	no	6	60	male	51	Married	High school	rural	Current	>1m	yes	yes	51.5314	2	1	Q2	6	Q3	60
060481226002	no	7	120	female	49	Married	High school	rural	Never	no	yes	yes	31.9226	2.33333	2	Q3	8	Q4	120
060481211002	no	8	60	male	58	Married	Elementary school and below	rural	Current	<1m	no	no	24.8389	2.66667	1	Q3	8	Q3	60
060481211001	no	6	30	female	56	Married	Elementary school and below	rural	Never	no	no	no	26.2378	2	0.5	Q2	6	Q3	60
060481213001	no	5	0	female	73	Non-married	High school	rural	Never	<1m	no	no	21.9621	1.66667	0	Q1	4	Q1	0
060481203001	no	7	60	male	59	Married	High school	rural	Current	no	yes	yes	24.9749	2.33333	1	Q3	8	Q3	60
060481203002	no	4	0	female	59	Married	Elementary school and below	rural	Never	no	no	no	24.1682	1.33333	0	Q1	4	Q1	0
060481201001	no	5	0	male	62	Married	Elementary school and below	rural	Never	no	yes	no	18.4429	1.66667	0	Q1	4	Q1	0
060481201002	no	2	0	female	59	Married	High school	rural	Never	no	yes	yes	26.4853	0.666667	0	Q1	4	Q1	0
060481232001	no	8	120	male	57	Married	High school	rural	Current	>1m	no	no	22.3858	2.66667	2	Q3	8	Q4	120
060481232002	no	6	0	female	55	Married	High school	rural	Never	no	no	no	33.8178	2	0	Q2	6	Q1	0
060481209001	no	7	0	female	60	Non-married	Elementary school and below	rural	Never	no	yes	no	23.271	2.33333	0	Q3	8	Q1	0
060481233002	no	10	120	male	67	Married	Elementary school and below	rural	Never	no	yes	no	24.1454	3.33333	2	Q4	9	Q4	120
060481233001	no	7	60	female	65	Married	High school	rural	Never	no	yes	no	18.2636	2.33333	1	Q3	8	Q3	60
060481216001	no	7	0	male	61	Married	Elementary school and below	rural	Current	<1m	no	no	23.4497	2.33333	0	Q3	8	Q1	0
060481216002	no	8	30	female	55	Married	Elementary school and below	rural	Never	no	no	no	23.3467	2.66667	0.5	Q3	8	Q3	60
060481221001	no	6	60	male	46	Married	High school	rural	Current	>1m	no	no	24.0955	2	1	Q2	6	Q3	60
060481221002	no	8	0	female	45	Married	Elementary school and below	rural	Never	no	no	no	27.7697	2.66667	0	Q3	8	Q1	0
060481227001	no	8	60	male	60	Non-married	Elementary school and below	rural	Never	no	no	no	19.8188	2.66667	1	Q3	8	Q3	60
060481202001	no	6	90	male	57	Married	High school	rural	Current	>1m	yes	no	19.0361	2	1.5	Q2	6	Q4	120
060481202002	no	7	0	female	57	Married	Elementary school and below	rural	Never	no	no	no	22.2208	2.33333	0	Q3	8	Q1	0
060481214001	no	8	60	male	61	Non-married	Elementary school and below	rural	Current	<1m	yes	no	23.8906	2.66667	1	Q3	8	Q3	60
060481206002	yes	8	60	male	57	Married	High school	rural	Never	>1m	no	no	27.4811	2.66667	1	Q3	8	Q3	60
060481225001	no	6	60	male	62	Married	Elementary school and below	rural	Current	<1m	yes	no	22.8918	2	1	Q2	6	Q3	60
060481225002	no	6	120	female	64	Married	Elementary school and below	rural	Never	<1m	yes	yes	24.8421	2	2	Q2	6	Q4	120
060481229002	no	7	0	male	63	Married	High school	rural	Never	>1m	no	no	22.4879	2.33333	0	Q3	8	Q1	0
060481229001	yes	7	0	female	65	Married	Elementary school and below	rural	Never	no	no	no	22.2532	2.33333	0	Q3	8	Q1	0
060481215001	no	9	2	male	54	Married	Elementary school and below	rural	Never	>1m	yes	no	23.0597	3	0.0333333	Q4	9	Q3	60
060481204002	no	7	120	male	72	Married	High school	rural	Current	>1m	yes	no	24.5549	2.33333	2	Q3	8	Q4	120
060481204001	no	6	0	female	65	Married	Elementary school and below	rural	Never	no	yes	no	21.2389	2	0	Q2	6	Q1	0
060440116001	no	6	1	female	67	Non-married	Elementary school and below	rural	Never	no	yes	no	32.4941	2	0.0166667	Q2	6	Q2	1
060440124001	no	7	2	male	50	Non-married	High school	rural	Current	>1m	yes	no	27.1208	2.33333	0.0333333	Q3	8	Q3	60
060440120002	no	4	2	female	53	Married	Elementary school and below	rural	Never	no	no	no	25.2346	1.33333	0.0333333	Q1	4	Q3	60
060440106002	no	8	2	male	58	Married	High school	rural	Former	>1m	yes	no	29.8988	2.66667	0.0333333	Q3	8	Q3	60
060440106001	no	8	2	female	58	Married	Elementary school and below	rural	Never	no	no	no	23.125	2.66667	0.0333333	Q3	8	Q3	60
060440102001	no	5	2	male	72	Married	High school	rural	Current	<1m	yes	no	23.072	1.66667	0.0333333	Q1	4	Q3	60
060440102002	no	3	0	female	75	Married	Elementary school and below	rural	Never	no	yes	no	26.1392	1	0	Q1	4	Q1	0
060440117001	no	8	2	female	66	Married	High school	rural	Never	no	yes	no	27.5306	2.66667	0.0333333	Q3	8	Q3	60
060440107002	no	8	60	male	47	Married	High school	rural	Never	>1m	yes	no	24.9695	2.66667	1	Q3	8	Q3	60
060440107001	no	6	0	female	47	Married	Elementary school and below	rural	Never	no	yes	yes	24.9065	2	0	Q2	6	Q1	0
060440110001	no	10	120	male	56	Married	High school	rural	Never	no	yes	no	25.0868	3.33333	2	Q4	9	Q4	120
060440110002	yes	10	60	female	53	Married	Elementary school and below	rural	Never	<1m	yes	no	26.7918	3.33333	1	Q4	9	Q3	60
060440105002	no	8	1	male	53	Married	High school	rural	Never	<1m	no	no	30.0386	2.66667	0.0166667	Q3	8	Q2	1
060440108001	no	5	120	male	54	Married	Elementary school and below	rural	Current	no	no	no	28.0232	1.66667	2	Q1	4	Q4	120
060440108002	no	5	0	female	56	Married	High school	rural	Never	no	yes	no	19.3858	1.66667	0	Q1	4	Q1	0
060440127001	no	5	0	male	52	Non-married	Elementary school and below	rural	Current	no	yes	no	23.8443	1.66667	0	Q1	4	Q1	0
060440115001	no	5.5	60	male	47	Married	High school	rural	Current	>1m	no	no	25.297	1.83333	1	Q2	6	Q3	60
060440115002	no	8	60	female	50	Married	High school	rural	Never	<1m	no	no	22.1696	2.66667	1	Q3	8	Q3	60
060440126001	no	7	120	male	46	Married	Elementary school and below	rural	Current	no	no	no	19.0483	2.33333	2	Q3	8	Q4	120
060440126002	no	7	120	female	48	Married	Elementary school and below	rural	Never	no	yes	no	21.9854	2.33333	2	Q3	8	Q4	120
060440113001	no	7	120	female	45	Married	High school	rural	Never	no	no	no	32.4945	2.33333	2	Q3	8	Q4	120
060440113002	no	10	60	male	46	Married	Elementary school and below	rural	Current	<1m	no	no	23.8251	3.33333	1	Q4	9	Q3	60
060440118001	no	1	120	male	55	Non-married	High school	rural	Current	>1m	yes	no	23.3538	0.333333	2	Q1	4	Q4	120
060440122001	no	7	3	male	65	Married	High school	rural	Current	<1m	yes	no	28.1682	2.33333	0.05	Q3	8	Q3	60
060440122002	no	8	3	female	67	Married	Elementary school and below	rural	Never	no	yes	no	19.0589	2.66667	0.05	Q3	8	Q3	60
060440114002	no	8	0	female	55	Married	High school	rural	Never	no	no	no	22.8125	2.66667	0	Q3	8	Q1	0
060440128001	no	8	0	male	58	Married	High school	rural	Never	<1m	yes	yes	28.3447	2.66667	0	Q3	8	Q1	0
060440128002	no	8	1	female	55	Married	High school	rural	Never	no	yes	no	29.3333	2.66667	0.0166667	Q3	8	Q2	1
060440111001	no	10	0	male	66	Married	Elementary school and below	rural	Current	>1m	no	no	17.9902	3.33333	0	Q4	9	Q1	0
060440111002	no	9	1	female	62	Married	Elementary school and below	rural	Never	no	no	no	27.3777	3	0.0166667	Q4	9	Q2	1
060440125002	no	11	0	male	62	Married	Elementary school and below	rural	Current	>1m	yes	no	17.6121	3.66667	0	Q4	9	Q1	0
060440125001	no	8	3	female	64	Married	Elementary school and below	rural	Never	no	yes	no	27.4047	2.66667	0.05	Q3	8	Q3	60
060440119002	no	6	1	male	54	Married	Elementary school and below	rural	Current	>1m	yes	no	28.7306	2	0.0166667	Q2	6	Q2	1
060440119001	no	8	2	female	48	Married	High school	rural	Never	no	no	no	44.7221	2.66667	0.0333333	Q3	8	Q3	60
060440103002	no	8	2	male	60	Married	Elementary school and below	rural	Current	>1m	no	no	19.7285	2.66667	0.0333333	Q3	8	Q3	60
060440103001	no	4	2	female	60	Married	Elementary school and below	rural	Never	no	no	no	28.664	1.33333	0.0333333	Q1	4	Q3	60
060440101001	no	5	30	female	57	Non-married	Elementary school and below	rural	Never	no	no	no	21.4844	1.66667	0.5	Q1	4	Q3	60
060440212001	no	5	0	male	52	Married	Elementary school and below	rural	Current	no	no	no	20.7612	1.66667	0	Q1	4	Q1	0
060440212002	no	6	1	female	52	Married	High school	rural	Never	no	no	no	27.4498	2	0.0166667	Q2	6	Q2	1
060440219001	no	8	1	male	56	Married	High school	rural	Current	>1m	no	no	23.3784	2.66667	0.0166667	Q3	8	Q2	1
060440219002	no	8	1	female	58	Married	Elementary school and below	rural	Never	no	yes	no	37.4523	2.66667	0.0166667	Q3	8	Q2	1
060440224002	no	7	1	male	48	Married	High school	rural	Current	no	no	no	23.8754	2.33333	0.0166667	Q3	8	Q2	1
060440224001	no	6	1	female	46	Married	High school	rural	Current	no	no	no	25.5457	2	0.0166667	Q2	6	Q2	1
060440216002	no	8	2	female	46	Married	High school	rural	Never	no	yes	no	28.2999	2.66667	0.0333333	Q3	8	Q3	60
060440209002	no	6	2	male	56	Married	High school	rural	Former	>1m	no	no	24.3548	2	0.0333333	Q2	6	Q3	60
060440209001	no	5	0	female	54	Married	Elementary school and below	rural	Never	no	yes	no	24.5913	1.66667	0	Q1	4	Q1	0
060440204001	no	6	2	male	49	Non-married	High school	rural	Never	no	yes	no	26.7351	2	0.0333333	Q2	6	Q3	60
060440221002	no	4	1	male	52	Married	High school	rural	Current	no	no	no	21.0556	1.33333	0.0166667	Q1	4	Q2	1
060440221001	no	8	2	female	53	Married	High school	rural	Never	no	yes	no	27.8705	2.66667	0.0333333	Q3	8	Q3	60
060440201001	no	8	1	male	58	Married	Elementary school and below	rural	Former	>1m	no	no	23.3784	2.66667	0.0166667	Q3	8	Q2	1
060440201002	no	8	1	female	61	Married	Elementary school and below	rural	Never	no	no	no	28.6161	2.66667	0.0166667	Q3	8	Q2	1
060440205002	no	8	2	male	63	Married	Elementary school and below	rural	Former	>1m	no	no	19.1406	2.66667	0.0333333	Q3	8	Q3	60
060440205001	no	6	2	female	66	Married	Elementary school and below	rural	Never	no	yes	no	24.1806	2	0.0333333	Q2	6	Q3	60
060440222001	no	8	2	male	64	Married	Elementary school and below	rural	Current	no	no	no	23.1604	2.66667	0.0333333	Q3	8	Q3	60
060440214001	no	8	1	male	49	Married	High school	rural	Current	>1m	yes	no	20.4165	2.66667	0.0166667	Q3	8	Q2	1
060440214002	no	6	2	female	49	Married	High school	rural	Never	no	yes	no	29.0579	2	0.0333333	Q2	6	Q3	60
060440215001	no	10	60	male	56	Married	Elementary school and below	rural	Current	no	no	no	21.5815	3.33333	1	Q4	9	Q3	60
060440215002	no	5	60	female	58	Married	Elementary school and below	rural	Never	no	no	no	18.0374	1.66667	1	Q1	4	Q3	60
060440220001	no	6	60	male	53	Married	High school	rural	Current	>1m	no	no	18.5235	2	1	Q2	6	Q3	60
060440220002	no	3	60	female	57	Married	High school	rural	Never	no	no	no	26.6118	1	1	Q1	4	Q3	60
060440211001	no	2	0	female	75	Non-married	Elementary school and below	rural	Never	no	yes	no	21.6016	0.666667	0	Q1	4	Q1	0
060440207002	no	6	80	male	54	Married	High school	rural	Current	>1m	no	no	23.8374	2	1.33333	Q2	6	Q4	120
060440207001	no	8	60	female	54	Married	High school	rural	Never	no	no	no	21.4025	2.66667	1	Q3	8	Q3	60
060440217002	no	4	60	female	47	Married	Elementary school and below	rural	Never	no	yes	no	24.0706	1.33333	1	Q1	4	Q3	60
060440218002	no	3	65	female	68	Married	Elementary school and below	rural	Never	no	yes	no	22.1446	1	1.08333	Q1	4	Q4	120
060440210001	no	5	60	male	46	Non-married	High school	rural	Current	>1m	yes	no	22.3027	1.66667	1	Q1	4	Q3	60
060440223002	no	8	90	male	61	Married	Elementary school and below	rural	Current	no	no	no	18.5698	2.66667	1.5	Q3	8	Q4	120
060440223001	no	8	180	female	64	Married	Elementary school and below	rural	Never	no	yes	yes	17.5392	2.66667	3	Q3	8	Q4	120
060440202001	no	4	120	male	53	Married	Elementary school and below	rural	Current	>1m	yes	no	19.8752	1.33333	2	Q1	4	Q4	120
060440202002	no	7	120	female	55	Married	High school	rural	Never	no	yes	yes	19.5143	2.33333	2	Q3	8	Q4	120
060440206001	no	4	120	male	46	Married	High school	rural	Current	no	no	no	21.0715	1.33333	2	Q1	4	Q4	120
060440213001	no	6	0	male	46	Married	High school	rural	Current	>1m	no	no	19.6708	2	0	Q2	6	Q1	0
060440213002	no	6	100	female	46	Married	High school	rural	Never	no	yes	no	19.7049	2	1.66667	Q2	6	Q4	120
060440203002	no	4.5	60	male	59	Married	Elementary school and below	rural	Current	>1m	no	no	21.1454	1.5	1	Q1	4	Q3	60
060440203001	no	6	0	female	58	Married	Elementary school and below	rural	Never	no	yes	yes	26.3931	2	0	Q2	6	Q1	0
060440317001	no	5	30	male	58	Non-married	High school	rural	Current	>1m	yes	no	21.2119	1.66667	0.5	Q1	4	Q3	60
060440302002	no	6	60	male	52	Married	High school	rural	Former	>1m	yes	no	23.6336	2	1	Q2	6	Q3	60
060440302001	no	6.5	120	female	50	Married	High school	rural	Never	no	no	no	28.987	2.16667	2	Q2	6	Q4	120
060440316001	no	5	120	male	57	Married	Elementary school and below	rural	Current	>1m	yes	no	20.9042	1.66667	2	Q1	4	Q4	120
060440316002	no	7	130	female	56	Married	Elementary school and below	rural	Never	no	no	no	28.0889	2.33333	2.16667	Q3	8	Q4	120
060440301002	no	8	60	male	75	Married	Elementary school and below	rural	Current	>1m	yes	no	19.3787	2.66667	1	Q3	8	Q3	60
060440309002	no	5	120	male	55	Married	High school	rural	Current	>1m	no	no	19.9509	1.66667	2	Q1	4	Q4	120
060440309001	no	6	120	female	57	Married	Elementary school and below	rural	Never	no	yes	no	24.8278	2	2	Q2	6	Q4	120
060440305001	no	6	60	female	71	Non-married	Elementary school and below	rural	Never	no	no	no	20.0161	2	1	Q2	6	Q3	60
060440310001	no	6	120	female	73	Non-married	Elementary school and below	rural	Never	no	yes	yes	23.8288	2	2	Q2	6	Q4	120
060440328001	no	7	120	male	62	Married	Elementary school and below	rural	Current	<1m	yes	yes	23.3536	2.33333	2	Q3	8	Q4	120
060440320001	no	8	60	female	58	Non-married	Elementary school and below	rural	Never	no	no	no	28.3039	2.66667	1	Q3	8	Q3	60
060440303001	no	6	60	male	57	Non-married	Elementary school and below	rural	Current	no	yes	yes	23.0697	2	1	Q2	6	Q3	60
060440311001	no	8	1	female	69	Married	High school	rural	Never	no	no	no	26.3591	2.66667	0.0166667	Q3	8	Q2	1
060440318002	no	6	0	female	62	Married	Elementary school and below	rural	Never	no	no	no	26.42	2	0	Q2	6	Q1	0
060440318001	no	6	1	male	67	Married	High school	rural	Current	no	yes	yes	29.7357	2	0.0166667	Q2	6	Q2	1
060440314001	no	8	2	male	58	Married	High school	rural	Current	no	no	no	18.9318	2.66667	0.0333333	Q3	8	Q3	60
060440325001	no	6	2	male	64	Married	Elementary school and below	rural	Former	>1m	yes	no	25.4295	2	0.0333333	Q2	6	Q3	60
060440325002	no	7	1	female	66	Married	Elementary school and below	rural	Never	no	no	yes	27.3034	2.33333	0.0166667	Q3	8	Q2	1
060440327002	no	8	0	female	60	Married	High school	rural	Never	no	no	no	20.0937	2.66667	0	Q3	8	Q1	0
060440307002	no	7	1	male	47	Married	High school	rural	Former	no	yes	yes	32.9966	2.33333	0.0166667	Q3	8	Q2	1
060440307001	no	8	2	female	45	Married	Elementary school and below	rural	Never	no	no	no	25.815	2.66667	0.0333333	Q3	8	Q3	60
060440326001	no	6	1	male	72	Non-married	High school	rural	Former	no	no	no	22.1593	2	0.0166667	Q2	6	Q2	1
060440323002	no	8	2	male	49	Married	High school	rural	Current	no	yes	no	28.8702	2.66667	0.0333333	Q3	8	Q3	60
060440323001	no	6	2	female	50	Married	High school	rural	Never	no	yes	no	30.196	2	0.0333333	Q2	6	Q3	60
060440308002	no	6	1	male	70	Married	High school	rural	Former	no	yes	no	23.3489	2	0.0166667	Q2	6	Q2	1
060440308001	no	6	2	female	70	Married	High school	rural	Never	no	no	no	27.3641	2	0.0333333	Q2	6	Q3	60
060440319002	no	6	0.5	male	64	Married	Elementary school and below	rural	Current	no	no	no	28.6018	2	0.00833333	Q2	6	Q2	1
060440313002	no	6	1	male	47	Married	High school	rural	Never	<1m	no	no	22.2093	2	0.0166667	Q2	6	Q2	1
060440313001	no	6	1	female	46	Married	High school	rural	Never	no	no	no	19.9959	2	0.0166667	Q2	6	Q2	1
060440321001	yes	6	1	male	58	Married	High school	rural	Current	<1m	no	no	22.2016	2	0.0166667	Q2	6	Q2	1
060440321002	no	6	1	female	59	Married	Elementary school and below	rural	Never	no	no	no	28.9971	2	0.0166667	Q2	6	Q2	1
065546320002	no	5	60	male	63	Married	Elementary school and below	rural	Never	no	no	no	20.744	1.66667	1	Q1	4	Q3	60
065546320001	no	7	0	female	64	Married	Elementary school and below	rural	Never	no	yes	no	20.8581	2.33333	0	Q3	8	Q1	0
065546303002	no	8	0	male	47	Married	High school	rural	Current	no	no	no	20.7956	2.66667	0	Q3	8	Q1	0
065546319001	no	10	60	male	58	Married	Elementary school and below	rural	Former	>1m	no	no	21.4978	3.33333	1	Q4	9	Q3	60
065546319002	no	6	0	female	58	Married	Elementary school and below	rural	Never	no	yes	yes	22.4872	2	0	Q2	6	Q1	0
065546312001	no	10	60	male	50	Married	Elementary school and below	rural	Current	no	yes	no	27.2024	3.33333	1	Q4	9	Q3	60
065546312002	no	8	60	female	51	Married	Elementary school and below	rural	Never	no	yes	no	31.5648	2.66667	1	Q3	8	Q3	60
065546315002	no	7	60	male	46	Married	Elementary school and below	rural	Former	>1m	no	no	22.7467	2.33333	1	Q3	8	Q3	60
065546315001	no	7	60	female	48	Married	High school	rural	Never	no	no	no	29.3947	2.33333	1	Q3	8	Q3	60
065546326001	no	5	60	male	59	Married	Elementary school and below	rural	Current	>1m	no	no	19.7778	1.66667	1	Q1	4	Q3	60
065546326002	no	5	120	female	59	Married	Elementary school and below	rural	Never	no	yes	no	22.8563	1.66667	2	Q1	4	Q4	120
065546329001	no	8	0	female	47	Married	High school	rural	Never	no	yes	no	30.5739	2.66667	0	Q3	8	Q1	0
065546307001	no	8	0	female	67	Married	High school	rural	Never	no	yes	no	25.4738	2.66667	0	Q3	8	Q1	0
065546308002	no	8	60	male	53	Married	Elementary school and below	rural	Never	>1m	no	no	23.394	2.66667	1	Q3	8	Q3	60
065546327001	no	8	60	male	81	Non-married	Elementary school and below	rural	Current	>1m	no	no	18.8631	2.66667	1	Q3	8	Q3	60
065546318002	no	7	60	male	61	Married	Elementary school and below	rural	Current	>1m	yes	no	22.6871	2.33333	1	Q3	8	Q3	60
065546318001	no	8	60	female	57	Married	Elementary school and below	rural	Never	no	yes	no	24.6836	2.66667	1	Q3	8	Q3	60
065546310002	yes	8	120	male	69	Married	High school	rural	Former	no	no	no	23.5599	2.66667	2	Q3	8	Q4	120
065546310001	no	6	60	female	68	Married	Elementary school and below	rural	Never	no	yes	no	22.0586	2	1	Q2	6	Q3	60
065546316001	no	5	0	female	63	Non-married	Elementary school and below	rural	Never	no	yes	no	26.8486	1.66667	0	Q1	4	Q1	0
065546302002	no	5	60	male	53	Married	Elementary school and below	rural	Current	>1m	no	no	23.8798	1.66667	1	Q1	4	Q3	60
065546302001	no	8	60	female	50	Married	Elementary school and below	rural	Never	no	no	no	24.0022	2.66667	1	Q3	8	Q3	60
065546328001	no	6	0	female	57	Married	Elementary school and below	rural	Never	no	no	no	23.0951	2	0	Q2	6	Q1	0
065546313001	no	7	60	male	47	Married	Elementary school and below	rural	Former	no	no	no	23.5031	2.33333	1	Q3	8	Q3	60
065546313002	no	7	90	female	48	Married	Elementary school and below	rural	Never	no	yes	no	27.931	2.33333	1.5	Q3	8	Q4	120
065546122002	no	6	0	male	61	Married	Elementary school and below	rural	Former	no	no	no	21.1638	2	0	Q2	6	Q1	0
065546122001	no	7	10	female	55	Married	Elementary school and below	rural	Never	no	no	yes	22.799	2.33333	0.166667	Q3	8	Q3	60
065546107001	no	8	0	male	51	Married	Elementary school and below	rural	Current	>1m	no	no	21.8846	2.66667	0	Q3	8	Q1	0
065546107002	no	5	10	female	50	Married	High school	rural	Never	no	no	no	26.7093	1.66667	0.166667	Q1	4	Q3	60
065546106001	no	10	0	male	53	Married	High school	rural	Current	>1m	yes	no	26.1583	3.33333	0	Q4	9	Q1	0
065546106002	no	6	0	female	49	Married	Elementary school and below	rural	Never	no	yes	no	27.578	2	0	Q2	6	Q1	0
065546121001	no	4	60	male	62	Married	Elementary school and below	rural	Current	<1m	yes	no	25.0745	1.33333	1	Q1	4	Q3	60
065546115002	no	8	0	female	60	Married	Elementary school and below	rural	Current	<1m	no	no	19.9809	2.66667	0	Q3	8	Q1	0
065546114001	no	6	0	male	62	Married	High school	rural	Current	no	yes	no	20.4863	2	0	Q2	6	Q1	0
065546109001	no	6	60	female	46	Married	High school	rural	Never	no	no	no	28.3037	2	1	Q2	6	Q3	60
065546111001	no	5	10	female	52	Married	High school	rural	Never	>1m	no	no	22.1727	1.66667	0.166667	Q1	4	Q3	60
065546119002	no	7	0	male	51	Married	High school	rural	Current	>1m	no	no	24.1927	2.33333	0	Q3	8	Q1	0
065546119001	no	7	20	female	50	Married	High school	rural	Never	no	yes	no	29.5705	2.33333	0.333333	Q3	8	Q3	60
065546105001	no	5	0	male	63	Non-married	Elementary school and below	rural	Current	>1m	no	no	20.1897	1.66667	0	Q1	4	Q1	0
065546123001	no	7	60	male	60	Married	High school	rural	Current	>1m	no	no	23.4607	2.33333	1	Q3	8	Q3	60
065546113001	no	6	120	female	49	Married	High school	rural	Current	>1m	yes	no	23.9548	2	2	Q2	6	Q4	120
065546110002	no	7	0	male	46	Married	Elementary school and below	rural	Current	>1m	no	no	21.7854	2.33333	0	Q3	8	Q1	0
065546108001	no	8	60	female	62	Non-married	Elementary school and below	rural	Never	no	yes	no	25.8372	2.66667	1	Q3	8	Q3	60
065546102001	no	4	60	female	48	Married	High school	rural	Never	no	yes	no	27.2115	1.33333	1	Q1	4	Q3	60
065546116002	no	8	60	male	70	Married	Elementary school and below	rural	Former	no	yes	no	27.4713	2.66667	1	Q3	8	Q3	60
065546116001	no	4	0	female	64	Married	Elementary school and below	rural	Never	no	yes	no	29.5361	1.33333	0	Q1	4	Q1	0
065546104002	no	7	0	female	48	Married	High school	rural	Never	no	no	no	22.3494	2.33333	0	Q3	8	Q1	0
065546117002	no	8	60	female	47	Married	High school	rural	Never	no	no	no	25.3792	2.66667	1	Q3	8	Q3	60
065546117001	no	8	60	male	48	Married	High school	rural	Former	>1m	yes	no	26.9965	2.66667	1	Q3	8	Q3	60
065546220001	no	8	120	male	55	Married	High school	rural	Former	>1m	no	no	25.7026	2.66667	2	Q3	8	Q4	120
065546220002	no	6	60	female	56	Married	Elementary school and below	rural	Never	no	yes	no	22.7344	2	1	Q2	6	Q3	60
065546216002	no	3	60	female	75	Married	Elementary school and below	rural	Never	no	no	no	19.5413	1	1	Q1	4	Q3	60
064604206002	no	8	30	male	47	Married	High school	urban	Never	>1m	yes	no	31.1003	2.66667	0.5	Q3	8	Q3	60
064604206001	no	6	60	female	46	Married	college and higher	urban	Never	no	no	no	23.1832	2	1	Q2	6	Q3	60
064604213001	no	7	20	male	69	Married	Elementary school and below	urban	Never	>1m	yes	no	26.2878	2.33333	0.333333	Q3	8	Q3	60
064604213002	no	6	0	female	72	Married	Elementary school and below	urban	Former	no	yes	yes	28.7614	2	0	Q2	6	Q1	0
064604201002	no	5	0	male	55	Married	High school	urban	Former	no	yes	no	21.7871	1.66667	0	Q1	4	Q1	0
064604201001	no	8	0	female	47	Married	Elementary school and below	urban	Never	no	yes	no	32.328	2.66667	0	Q3	8	Q1	0
064604301001	no	6	60	female	47	Married	High school	urban	Never	no	no	no	25.8834	2	1	Q2	6	Q3	60
064604315002	no	7	60	male	71	Married	Elementary school and below	urban	Never	no	no	no	24.5617	2.33333	1	Q3	8	Q3	60
064604309002	no	8	60	male	49	Married	Elementary school and below	urban	Former	no	yes	no	20.9042	2.66667	1	Q3	8	Q3	60
064604112002	no	8	120	female	47	Married	college and higher	urban	Never	no	no	no	28.5032	2.66667	2	Q3	8	Q4	120
064604108001	no	8	60	female	66	Non-married	Elementary school and below	urban	Never	no	yes	no	24.7617	2.66667	1	Q3	8	Q3	60
064604113002	no	5	0	female	45	Married	High school	urban	Never	no	no	no	29.0355	1.66667	0	Q1	4	Q1	0
064604105002	no	7	120	female	60	Married	Elementary school and below	urban	Never	no	yes	no	30.0012	2.33333	2	Q3	8	Q4	120
064604114001	no	8	60	female	62	Married	Elementary school and below	urban	Never	no	yes	no	24.7156	2.66667	1	Q3	8	Q3	60
064604101001	no	7	120	female	57	Married	Elementary school and below	urban	Never	no	yes	no	30.7499	2.33333	2	Q3	8	Q4	120
064604101002	no	8	0	male	63	Married	High school	urban	Former	no	no	no	18.4228	2.66667	0	Q3	8	Q1	0
064604109001	yes	10	0	female	46	Married	Elementary school and below	urban	Never	no	no	no	34.7645	3.33333	0	Q4	9	Q1	0
064604110002	no	5	120	male	78	Married	Elementary school and below	urban	Never	no	yes	no	28.8897	1.66667	2	Q1	4	Q4	120
064604110001	no	4	60	female	72	Married	Elementary school and below	urban	Never	no	no	no	32.6684	1.33333	1	Q1	4	Q3	60
064604102002	no	8	120	male	55	Married	High school	urban	Current	>1m	yes	no	29.889	2.66667	2	Q3	8	Q4	120
064604102001	no	7	0	female	57	Married	High school	urban	Never	no	yes	no	31.5693	2.33333	0	Q3	8	Q1	0
064604116001	no	8	1	male	59	Married	Elementary school and below	urban	Never	no	yes	no	25.2331	2.66667	0.0166667	Q3	8	Q2	1
064604103002	no	7	120	male	49	Married	High school	urban	Never	no	yes	no	24.237	2.33333	2	Q3	8	Q4	120
064604103001	no	8	120	female	49	Married	Elementary school and below	urban	Never	no	no	no	30.5922	2.66667	2	Q3	8	Q4	120
064604117002	no	8	0	female	62	Married	Elementary school and below	urban	Never	no	yes	no	32.3229	2.66667	0	Q3	8	Q1	0
064604117001	no	8	120	male	64	Married	Elementary school and below	urban	Former	>1m	no	no	27.0527	2.66667	2	Q3	8	Q4	120
171159103002	no	6	1	male	46	Married	High school	rural	Former	<1m	no	no	29.1374	2	0.0166667	Q2	6	Q2	1
171159103001	no	8	60	female	45	Married	Elementary school and below	rural	Never	no	no	no	32.2991	2.66667	1	Q3	8	Q3	60
171159127002	no	8	60	male	62	Married	High school	rural	Current	no	yes	no	25.6728	2.66667	1	Q3	8	Q3	60
171159127001	no	5	60	female	56	Married	Elementary school and below	rural	Never	no	yes	yes	26.6637	1.66667	1	Q1	4	Q3	60
171159105001	no	6	0	male	70	Married	Elementary school and below	rural	Current	no	yes	no	21.8089	2	0	Q2	6	Q1	0
171159105002	no	6	60	female	65	Married	Elementary school and below	rural	Current	no	yes	no	18.2405	2	1	Q2	6	Q3	60
171159104001	no	7	120	male	57	Non-married	Elementary school and below	rural	Current	no	no	no	20.2332	2.33333	2	Q3	8	Q4	120
171159120002	no	6	0	male	45	Married	High school	rural	Current	>1m	no	no	19.9696	2	0	Q2	6	Q1	0
171159120001	no	8	60	female	47	Married	High school	rural	Never	no	yes	no	23.1152	2.66667	1	Q3	8	Q3	60
171159106001	no	8	0	male	47	Married	High school	rural	Former	no	no	no	27.3038	2.66667	0	Q3	8	Q1	0
171159117001	no	6	60	female	59	Married	Elementary school and below	rural	Never	no	no	no	22.1337	2	1	Q2	6	Q3	60
171159114002	no	8	0	male	57	Married	Elementary school and below	rural	Current	<1m	yes	no	27.7645	2.66667	0	Q3	8	Q1	0
171159114001	no	8	30	female	57	Married	Elementary school and below	rural	Never	no	yes	no	33.0468	2.66667	0.5	Q3	8	Q3	60
171159126001	no	6	60	male	56	Married	High school	rural	Former	<1m	no	yes	22.3181	2	1	Q2	6	Q3	60
171159126002	no	6	0	female	54	Married	Elementary school and below	rural	Never	no	yes	no	31.1694	2	0	Q2	6	Q1	0
171159110001	no	7	120	female	62	Non-married	Elementary school and below	rural	Never	no	yes	no	26.5997	2.33333	2	Q3	8	Q4	120
171159121002	no	8	120	female	69	Married	Elementary school and below	rural	Current	no	yes	no	26.6839	2.66667	2	Q3	8	Q4	120
171159118002	no	3	0	male	57	Married	Elementary school and below	rural	Former	no	no	no	26.2626	1	0	Q1	4	Q1	0
171159118001	no	5	0	female	57	Married	Elementary school and below	rural	Never	no	no	no	22.8928	1.66667	0	Q1	4	Q1	0
171159125002	no	7	120	male	61	Married	Elementary school and below	rural	Current	>1m	no	no	24.5022	2.33333	2	Q3	8	Q4	120
171159125001	no	8	120	female	57	Married	Elementary school and below	rural	Never	no	yes	no	29.8698	2.66667	2	Q3	8	Q4	120
171159124002	no	8	60	male	53	Married	High school	rural	Current	>1m	yes	no	20.8933	2.66667	1	Q3	8	Q3	60
171159111002	no	5	120	male	69	Married	Elementary school and below	rural	Current	no	yes	no	28.1233	1.66667	2	Q1	4	Q4	120
171159111001	no	8	120	female	68	Married	Elementary school and below	rural	Never	no	yes	no	28.7878	2.66667	2	Q3	8	Q4	120
171159112001	no	6	60	male	56	Non-married	High school	rural	Never	<1m	yes	no	26.8871	2	1	Q2	6	Q3	60
171159113002	no	7	120	male	74	Married	Elementary school and below	rural	Current	no	no	no	23.5284	2.33333	2	Q3	8	Q4	120
171159113001	no	5	120	female	72	Married	Elementary school and below	rural	Former	no	no	no	19.7521	1.66667	2	Q1	4	Q4	120
171159115001	no	4	2	male	46	Non-married	Elementary school and below	rural	Never	no	yes	no	28.0011	1.33333	0.0333333	Q1	4	Q3	60
171159108001	no	6	0	male	59	Married	Elementary school and below	rural	Current	no	no	no	19.9891	2	0	Q2	6	Q1	0
171159107001	no	8	120	male	49	Married	High school	rural	Current	no	yes	no	24.9202	2.66667	2	Q3	8	Q4	120
171159107002	no	8	120	female	45	Married	High school	rural	Never	no	yes	no	28.394	2.66667	2	Q3	8	Q4	120
171159116001	no	6	0	female	70	Married	Elementary school and below	rural	Never	no	yes	no	24.1803	2	0	Q2	6	Q1	0
171159122002	no	4	30	female	57	Married	Elementary school and below	rural	Never	no	yes	no	17.1267	1.33333	0.5	Q1	4	Q3	60
171159109002	no	7	60	male	45	Married	High school	rural	Never	no	no	no	29.9753	2.33333	1	Q3	8	Q3	60
171159109001	no	10	120	female	48	Married	Elementary school and below	rural	Never	no	yes	no	28.1337	3.33333	2	Q4	9	Q4	120
171159119001	no	8	60	male	46	Married	High school	rural	Current	>1m	no	no	17.5537	2.66667	1	Q3	8	Q3	60
171159101002	no	7	90	male	51	Married	High school	rural	Current	no	no	no	23.3862	2.33333	1.5	Q3	8	Q4	120
171159101001	no	5	30	female	48	Married	High school	rural	Never	no	no	no	29.7137	1.66667	0.5	Q1	4	Q3	60
171159221001	no	8	120	female	64	Married	Elementary school and below	rural	Never	no	yes	yes	25.4589	2.66667	2	Q3	8	Q4	120
171159213001	no	7	60	male	68	divorced	Elementary school and below	rural	Current	no	no	no	18.5634	2.33333	1	Q3	8	Q3	60
171159203001	no	8	90	male	65	Non-married	High school	rural	Former	no	no	no	23.816	2.66667	1.5	Q3	8	Q4	120
171159222001	no	5	30	female	61	Non-married	Elementary school and below	rural	Never	no	yes	no	24.5155	1.66667	0.5	Q1	4	Q3	60
171159211001	no	8	0	male	53	Married	High school	rural	Current	no	no	no	23.9844	2.66667	0	Q3	8	Q1	0
171159211002	no	8	0	female	52	Married	High school	rural	Never	no	no	no	21.3123	2.66667	0	Q3	8	Q1	0
171159227001	no	7	60	female	82	Married	Elementary school and below	rural	Never	no	yes	no	24.4859	2.33333	1	Q3	8	Q3	60
171159218001	no	8	120	female	59	Non-married	Elementary school and below	rural	Never	no	no	no	25.4222	2.66667	2	Q3	8	Q4	120
171159216001	no	8	60	male	61	Married	High school	rural	Current	no	yes	no	23.4486	2.66667	1	Q3	8	Q3	60
171159216002	no	8	60	female	55	Married	Elementary school and below	rural	Never	no	no	no	24.443	2.66667	1	Q3	8	Q3	60
171159224002	no	8	180	male	61	Married	High school	rural	Former	no	yes	yes	24.0578	2.66667	3	Q3	8	Q4	120
171159224001	no	6	60	female	58	Married	Elementary school and below	rural	Never	no	yes	no	21.8177	2	1	Q2	6	Q3	60
171159209002	no	7	120	male	78	Married	Elementary school and below	rural	Former	no	no	no	25.6736	2.33333	2	Q3	8	Q4	120
171159209001	no	7	120	female	80	Married	Elementary school and below	rural	Never	no	yes	no	28.7387	2.33333	2	Q3	8	Q4	120
171159214001	no	8	60	male	54	Married	Elementary school and below	rural	Current	>1m	no	no	21.0728	2.66667	1	Q3	8	Q3	60
171159214002	no	8	0	female	51	Married	Elementary school and below	rural	Never	no	no	no	22.5042	2.66667	0	Q3	8	Q1	0
171159201002	no	8	60	male	52	Married	High school	rural	Current	<1m	no	no	20.7166	2.66667	1	Q3	8	Q3	60
171159201001	no	5	60	female	50	Married	Elementary school and below	rural	Current	no	no	no	23.1433	1.66667	1	Q1	4	Q3	60
171159210001	no	6	60	male	68	Married	Elementary school and below	rural	Former	no	yes	no	26.8016	2	1	Q2	6	Q3	60
171159210002	no	5	60	female	67	Married	Elementary school and below	rural	Never	no	yes	yes	20.3221	1.66667	1	Q1	4	Q3	60
171159205002	no	8	120	male	47	Married	Elementary school and below	rural	Current	>1m	no	no	19.9124	2.66667	2	Q3	8	Q4	120
171159215002	no	6	60	male	56	Married	High school	rural	Current	no	no	no	29.292	2	1	Q2	6	Q3	60
171159215001	no	6	60	female	54	Married	Elementary school and below	rural	Never	no	no	no	23.0363	2	1	Q2	6	Q3	60
171159219002	no	8	120	male	48	Married	High school	rural	Current	>1m	yes	yes	22.7944	2.66667	2	Q3	8	Q4	120
171159219001	no	8	120	female	48	Married	High school	rural	Current	no	yes	no	29.5802	2.66667	2	Q3	8	Q4	120
171159225002	no	8	60	male	59	Married	Elementary school and below	rural	Never	no	no	no	24.0473	2.66667	1	Q3	8	Q3	60
171159225001	no	8	60	female	57	Married	Elementary school and below	rural	Never	no	yes	no	25.3828	2.66667	1	Q3	8	Q3	60
171159207001	no	8	60	male	53	Married	High school	rural	Former	<1m	yes	no	29.6908	2.66667	1	Q3	8	Q3	60
171159207002	no	8	60	female	51	Married	High school	rural	Never	no	no	yes	27.6799	2.66667	1	Q3	8	Q3	60
171159208001	no	8	60	male	58	Married	Elementary school and below	rural	Former	no	yes	no	26.5083	2.66667	1	Q3	8	Q3	60
171159208002	no	6	30	female	57	Married	Elementary school and below	rural	Never	no	yes	no	27.2599	2	0.5	Q2	6	Q3	60
171159204002	no	9	60	male	61	Married	High school	rural	Current	no	no	yes	26.0107	3	1	Q4	9	Q3	60
171159204001	no	9	60	female	57	Married	Elementary school and below	rural	Never	no	no	no	24.5996	3	1	Q4	9	Q3	60
171159212002	no	8	60	female	58	Married	Elementary school and below	rural	Never	no	yes	no	28.5899	2.66667	1	Q3	8	Q3	60
171159206001	no	8	60	male	65	Married	Elementary school and below	rural	Current	no	no	no	20.7079	2.66667	1	Q3	8	Q3	60
171159226001	no	7	0	male	58	Married	Elementary school and below	rural	Current	no	yes	no	24.5449	2.33333	0	Q3	8	Q1	0
171159223001	no	8	0	male	65	Married	High school	rural	Former	<1m	no	no	26.3458	2.66667	0	Q3	8	Q1	0
171159223002	no	8	120	female	64	Married	Elementary school and below	rural	Current	no	yes	no	24.9204	2.66667	2	Q3	8	Q4	120
171159202002	no	7	0	male	46	Married	High school	rural	Current	no	no	yes	21.401	2.33333	0	Q3	8	Q1	0
171159202001	no	7	120	female	45	Married	Elementary school and below	rural	Never	no	no	no	22.9781	2.33333	2	Q3	8	Q4	120
171159311002	no	9	120	female	55	Married	High school	rural	Never	no	no	yes	28.4945	3	2	Q4	9	Q4	120
171159306001	no	9	120	female	81	Non-married	Elementary school and below	rural	Never	no	yes	yes	20.5127	3	2	Q4	9	Q4	120
171159302001	no	8	120	female	52	Married	Elementary school and below	rural	Never	no	yes	no	30.3395	2.66667	2	Q3	8	Q4	120
171159312002	yes	8	120	male	58	Married	Elementary school and below	rural	Current	no	yes	no	19.1638	2.66667	2	Q3	8	Q4	120
171159312001	no	8	120	female	57	Married	Elementary school and below	rural	Never	no	yes	no	21.8314	2.66667	2	Q3	8	Q4	120
171159323002	no	9	60	female	72	Married	Elementary school and below	rural	Current	no	yes	no	23.3248	3	1	Q4	9	Q3	60
171159319002	no	8	120	male	57	Married	Elementary school and below	rural	Current	no	no	no	20.5662	2.66667	2	Q3	8	Q4	120
171159317001	no	6	60	male	60	Non-married	Elementary school and below	rural	Former	>1m	no	no	30.4111	2	1	Q2	6	Q3	60
171159318001	no	8	120	female	56	Married	Elementary school and below	rural	Never	no	yes	no	30.7749	2.66667	2	Q3	8	Q4	120
171159304001	no	8	120	female	68	Non-married	Elementary school and below	rural	Former	no	yes	no	19.2984	2.66667	2	Q3	8	Q4	120
171159313002	yes	7	60	male	57	Married	Elementary school and below	rural	Current	no	yes	no	27.0879	2.33333	1	Q3	8	Q3	60
171159313001	no	7	60	female	53	Married	Elementary school and below	rural	Never	no	no	no	31.3168	2.33333	1	Q3	8	Q3	60
171159301001	no	8	0	male	56	Non-married	Elementary school and below	rural	Current	<1m	yes	no	22.7364	2.66667	0	Q3	8	Q1	0
171159320001	no	5	30	female	61	Married	Elementary school and below	rural	Former	no	yes	no	25.9891	1.66667	0.5	Q1	4	Q3	60
171159310002	no	8	60	male	64	Married	Elementary school and below	rural	Current	<1m	no	no	27.1571	2.66667	1	Q3	8	Q3	60
171159316002	no	8	0	male	61	Married	Elementary school and below	rural	Former	>1m	no	no	24.2478	2.66667	0	Q3	8	Q1	0
171159316001	no	5	0	female	58	Married	Elementary school and below	rural	Never	no	no	no	23.7088	1.66667	0	Q1	4	Q1	0
175531220001	no	7	60	male	51	Married	High school	rural	Current	no	no	yes	25.1359	2.33333	1	Q3	8	Q3	60
175531220002	no	5	30	female	50	Married	High school	rural	Never	no	no	no	26.2292	1.66667	0.5	Q1	4	Q3	60
175531201002	no	7	120	male	60	Married	Elementary school and below	rural	Current	<1m	no	no	21.5645	2.33333	2	Q3	8	Q4	120
175531216002	no	7	60	female	45	Married	Elementary school and below	rural	Never	no	no	no	20.4787	2.33333	1	Q3	8	Q3	60
175531218001	no	2	60	female	82	Non-married	Elementary school and below	rural	Never	no	yes	no	19.6836	0.666667	1	Q1	4	Q3	60
175531207002	no	5	1	female	59	Married	Elementary school and below	rural	Never	no	no	no	32.8305	1.66667	0.0166667	Q1	4	Q2	1
175531222002	no	5	0	female	64	Married	Elementary school and below	rural	Never	no	no	no	26.0077	1.66667	0	Q1	4	Q1	0
175531211002	no	6	120	male	60	Married	High school	rural	Never	no	no	no	31.0618	2	2	Q2	6	Q4	120
175531211001	no	7	120	female	59	Married	Elementary school and below	rural	Never	no	no	no	20.1632	2.33333	2	Q3	8	Q4	120
175531224001	no	6	1	male	65	Married	High school	rural	Current	no	no	no	21.4996	2	0.0166667	Q2	6	Q2	1
175531224002	no	7	1	female	61	Married	Elementary school and below	rural	Never	no	no	no	21.9482	2.33333	0.0166667	Q3	8	Q2	1
175531214001	no	8	120	female	54	Married	High school	rural	Never	no	no	no	24.1333	2.66667	2	Q3	8	Q4	120
175531219002	no	8	1	male	58	Married	Elementary school and below	rural	Former	<1m	yes	no	30.8777	2.66667	0.0166667	Q3	8	Q2	1
175531219001	no	7	1	female	58	Married	Elementary school and below	rural	Never	no	yes	no	27.0831	2.33333	0.0166667	Q3	8	Q2	1
175531206001	no	5	2	male	74	Non-married	Elementary school and below	rural	Never	no	no	no	21.7578	1.66667	0.0333333	Q1	4	Q3	60
175531217001	no	7	30	female	55	Non-married	High school	rural	Never	no	yes	no	24.2032	2.33333	0.5	Q3	8	Q3	60
175531221001	no	5	1	female	64	Married	Elementary school and below	rural	Never	no	yes	no	25.277	1.66667	0.0166667	Q1	4	Q2	1
175531205002	no	5	0	female	61	Married	Elementary school and below	rural	Never	no	no	no	24.7111	1.66667	0	Q1	4	Q1	0
175531210001	no	5	120	male	52	Married	High school	rural	Current	no	no	no	17.5064	1.66667	2	Q1	4	Q4	120
175531210002	no	5	0	female	51	Married	Elementary school and below	rural	Never	no	no	no	25.2381	1.66667	0	Q1	4	Q1	0
175531204002	no	5	60	male	50	Married	High school	rural	Never	no	no	no	22.0753	1.66667	1	Q1	4	Q3	60
175531204001	no	7	60	female	46	Married	High school	rural	Never	no	no	no	23.2735	2.33333	1	Q3	8	Q3	60
175531212001	no	6	0	male	62	Married	Elementary school and below	rural	Former	no	yes	no	25.625	2	0	Q2	6	Q1	0
175531212002	no	8	1	female	58	Married	Elementary school and below	rural	Never	no	yes	no	26.5167	2.66667	0.0166667	Q3	8	Q2	1
175531225002	no	7	0	male	50	Married	High school	rural	Never	no	no	no	25.9109	2.33333	0	Q3	8	Q1	0
175531225001	no	8	0	female	51	Married	Elementary school and below	rural	Never	no	no	no	23.6686	2.66667	0	Q3	8	Q1	0
175531202001	no	7	60	male	58	Married	Elementary school and below	rural	Current	no	no	no	21.4536	2.33333	1	Q3	8	Q3	60
175531202002	no	7	60	female	53	Married	Elementary school and below	rural	Never	no	no	no	26.4792	2.33333	1	Q3	8	Q3	60
175531208001	no	5	1	male	66	Married	Elementary school and below	rural	Current	no	no	no	20.4959	1.66667	0.0166667	Q1	4	Q2	1
175531208002	no	3	0	female	62	Married	Elementary school and below	rural	Never	no	yes	no	15.9527	1	0	Q1	4	Q1	0
175531118002	no	5	20	male	69	Married	Elementary school and below	urban	Former	no	yes	no	24.4118	1.66667	0.333333	Q1	4	Q3	60
175531118001	no	6	20	female	69	Married	High school	urban	Never	no	yes	no	30.218	2	0.333333	Q2	6	Q3	60
175531117001	no	6	30	male	57	Married	High school	urban	Current	no	yes	no	23.3111	2	0.5	Q2	6	Q3	60
175531117002	no	9	30	female	57	Married	High school	urban	Never	no	no	no	22.438	3	0.5	Q4	9	Q3	60
175531119002	no	7	60	male	50	Married	High school	urban	Current	<1m	no	no	23.737	2.33333	1	Q3	8	Q3	60
175531119001	no	7	60	female	49	Married	High school	urban	Never	no	yes	no	23.2008	2.33333	1	Q3	8	Q3	60
175531110002	no	7	60	male	61	Married	High school	urban	Never	no	no	no	21.9671	2.33333	1	Q3	8	Q3	60
175531110001	no	7	0	female	61	Married	Elementary school and below	urban	Never	no	yes	no	28.1722	2.33333	0	Q3	8	Q1	0
175531316002	no	5	2	male	54	Married	High school	rural	Current	no	no	no	24.8438	1.66667	0.0333333	Q1	4	Q3	60
175531316001	no	5	2	female	54	Married	Elementary school and below	rural	Never	no	no	no	22.2489	1.66667	0.0333333	Q1	4	Q3	60
175531322001	no	6	2	male	54	Married	High school	rural	Former	>1m	no	no	24.0569	2	0.0333333	Q2	6	Q3	60
175531322002	no	6	30	female	54	Married	High school	rural	Never	no	no	no	21.1702	2	0.5	Q2	6	Q3	60
175531315001	no	6	60	male	53	Married	High school	rural	Current	no	no	no	20.6869	2	1	Q2	6	Q3	60
175531308001	no	3	0	female	77	Married	High school	rural	Never	no	no	no	19.5635	1	0	Q1	4	Q1	0
175531309001	no	5	0	male	61	Married	High school	rural	Never	no	no	no	21.8464	1.66667	0	Q1	4	Q1	0
175531309002	no	6	1	female	59	Married	High school	rural	Never	no	no	yes	26.2649	2	0.0166667	Q2	6	Q2	1
175531304001	no	3	60	male	49	Married	High school	rural	Never	no	no	no	23.1038	1	1	Q1	4	Q3	60
175531304002	no	5	0	female	48	Married	High school	rural	Never	no	no	yes	26.9768	1.66667	0	Q1	4	Q1	0
175531303001	yes	4	2	male	61	Married	High school	rural	Former	<1m	no	no	21.4536	1.33333	0.0333333	Q1	4	Q3	60
175531303002	no	2	0	female	55	Married	Elementary school and below	rural	Never	no	no	no	26.6216	0.666667	0	Q1	4	Q1	0
175531324001	no	6	0	male	73	Married	Elementary school and below	rural	Never	no	yes	no	27.7529	2	0	Q2	6	Q1	0
175531324002	no	6	0	female	68	Married	Elementary school and below	rural	Never	no	yes	no	24.3868	2	0	Q2	6	Q1	0
175531301001	no	7	0	male	50	Married	High school	rural	Never	no	no	no	27.6217	2.33333	0	Q3	8	Q1	0
175531301002	no	7	0	female	49	Married	Elementary school and below	rural	Never	no	no	no	22.9304	2.33333	0	Q3	8	Q1	0
175531317002	no	6	0	female	48	Married	Elementary school and below	rural	Never	no	yes	no	24.4141	2	0	Q2	6	Q1	0
175531311001	no	9	70	female	54	Married	High school	rural	Never	no	no	no	29.5613	3	1.16667	Q4	9	Q4	120
175531321001	no	6	1	female	53	Married	Elementary school and below	rural	Never	no	no	no	26.9258	2	0.0166667	Q2	6	Q2	1
174643131001	no	7	0	male	67	Married	Elementary school and below	rural	Current	>1m	no	no	22.9075	2.33333	0	Q3	8	Q1	0
174643118002	no	5	120	female	79	Married	Elementary school and below	rural	Never	no	no	no	19.9203	1.66667	2	Q1	4	Q4	120
174643108001	no	5	0	male	72	Married	Elementary school and below	rural	Current	>1m	yes	no	18.4424	1.66667	0	Q1	4	Q1	0
174643108002	no	7	120	female	66	Married	Elementary school and below	rural	Current	no	no	yes	27.5952	2.33333	2	Q3	8	Q4	120
174643110001	no	2	0	male	56	Married	High school	rural	Current	no	yes	no	22.761	0.666667	0	Q1	4	Q1	0
174643111002	no	7	0	female	60	Married	Elementary school and below	rural	Current	no	no	no	21.0182	2.33333	0	Q3	8	Q1	0
174643132001	no	4.5	0	male	47	Married	High school	rural	Current	>1m	yes	no	27.8051	1.5	0	Q1	4	Q1	0
174643126001	no	8	60	male	51	divorced	High school	rural	Current	>1m	no	no	19.9253	2.66667	1	Q3	8	Q3	60
174643124001	no	5	0	male	63	Married	Elementary school and below	rural	Current	no	no	no	19.3625	1.66667	0	Q1	4	Q1	0
174643124002	no	9	0	female	54	Married	Elementary school and below	rural	Current	no	yes	no	31.0779	3	0	Q4	9	Q1	0
174643121001	no	8	0	male	60	Non-married	Elementary school and below	rural	Current	no	no	no	19.8132	2.66667	0	Q3	8	Q1	0
174643117001	no	8	0	male	55	Married	High school	rural	Current	no	no	no	21.0868	2.66667	0	Q3	8	Q1	0
174643117002	no	8	0	female	52	Married	Elementary school and below	rural	Never	no	no	no	29.0318	2.66667	0	Q3	8	Q1	0
174643105001	no	2	60	male	48	Married	High school	rural	Former	>1m	no	no	23.0551	0.666667	1	Q1	4	Q3	60
174643105002	no	8	60	female	46	Married	Elementary school and below	rural	Never	>1m	no	no	26.8976	2.66667	1	Q3	8	Q3	60
174643102002	no	8	0	male	47	Married	High school	rural	Never	no	no	no	22.5474	2.66667	0	Q3	8	Q1	0
174643102001	no	7	0	female	47	Married	High school	rural	Never	no	no	no	20.0471	2.33333	0	Q3	8	Q1	0
174643123002	no	10	2	male	59	Married	High school	rural	Current	>1m	yes	no	20.6225	3.33333	0.0333333	Q4	9	Q3	60
174643123001	no	6	4	female	52	Married	Elementary school and below	rural	Never	no	yes	no	21.9428	2	0.0666667	Q2	6	Q3	60
174643125002	no	8	0	male	55	Married	High school	rural	Current	<1m	no	no	19.6893	2.66667	0	Q3	8	Q1	0
174643125001	no	8	0	female	52	Married	High school	rural	Never	no	no	no	23.1455	2.66667	0	Q3	8	Q1	0
174643106002	no	7	0	male	47	Married	Elementary school and below	rural	Current	no	no	no	21.5005	2.33333	0	Q3	8	Q1	0
174643120001	no	10	0	male	52	Married	High school	rural	Current	>1m	no	no	20.9947	3.33333	0	Q4	9	Q1	0
174643120002	no	9	60	female	46	Married	Elementary school and below	rural	Never	no	no	no	21.5152	3	1	Q4	9	Q3	60
174643109001	no	8	120	female	63	Non-married	Elementary school and below	rural	Current	no	no	yes	22.876	2.66667	2	Q3	8	Q4	120
174643101002	yes	4	0	female	55	Married	Elementary school and below	rural	Never	no	no	no	20.1733	1.33333	0	Q1	4	Q1	0
174643112001	no	3.5	0	male	68	Married	High school	rural	Current	no	no	no	19.187	1.16667	0	Q1	4	Q1	0
174643112002	no	8	0	female	60	Married	Elementary school and below	rural	Never	no	yes	no	23.4558	2.66667	0	Q3	8	Q1	0
174643128001	yes	8	0	male	57	Married	High school	rural	Current	no	no	no	18.6928	2.66667	0	Q3	8	Q1	0
174643128002	no	6	0	female	53	Married	High school	rural	Never	no	no	no	24.7771	2	0	Q2	6	Q1	0
174643130001	no	6.5	0	male	47	Non-married	High school	rural	Current	no	no	no	17.0631	2.16667	0	Q2	6	Q1	0
174643107002	no	9	60	male	67	Married	High school	rural	Never	no	no	no	21.769	3	1	Q4	9	Q3	60
174643103002	no	7	100	female	66	Married	Elementary school and below	rural	Never	no	yes	yes	29.4281	2.33333	1.66667	Q3	8	Q4	120
174643119002	no	8	80	male	65	Married	High school	rural	Current	no	yes	yes	24.8207	2.66667	1.33333	Q3	8	Q4	120
174643119001	no	8	120	female	60	Married	Elementary school and below	rural	Current	no	no	no	17.9619	2.66667	2	Q3	8	Q4	120
174643104001	no	7	100	male	70	Married	High school	rural	Current	no	no	no	24.0419	2.33333	1.66667	Q3	8	Q4	120
174643104002	no	7	60	female	68	Married	Elementary school and below	rural	Current	no	no	no	25.2629	2.33333	1	Q3	8	Q3	60
174643122002	no	8	30	male	46	Married	Elementary school and below	rural	Former	<1m	no	no	24.4972	2.66667	0.5	Q3	8	Q3	60
174643113002	no	8	120	male	66	Married	High school	rural	Current	>1m	no	no	21.6244	2.66667	2	Q3	8	Q4	120
174643113001	no	10	90	female	61	Married	Elementary school and below	rural	Current	no	yes	no	28.2057	3.33333	1.5	Q4	9	Q4	120
174643305001	no	7	60	female	47	Married	High school	urban	Never	no	no	no	24.1389	2.33333	1	Q3	8	Q3	60
174643307002	no	6	0	male	53	Married	High school	urban	Current	no	no	no	21.2245	2	0	Q2	6	Q1	0
174643307001	no	8	0	female	48	Married	Elementary school and below	urban	Never	no	no	no	24.8459	2.66667	0	Q3	8	Q1	0
174643306002	no	7	30	male	63	Married	High school	urban	Never	no	no	yes	23.933	2.33333	0.5	Q3	8	Q3	60
174643306001	no	8	20	female	60	Married	High school	urban	Never	no	no	no	20.9771	2.66667	0.333333	Q3	8	Q3	60
174643311001	no	5	60	male	45	Married	High school	urban	Current	>1m	yes	yes	27.8841	1.66667	1	Q1	4	Q3	60
174643311002	no	8	120	female	46	Married	High school	urban	Never	no	no	yes	27.3289	2.66667	2	Q3	8	Q4	120
174643308001	no	8	120	female	76	Non-married	Elementary school and below	urban	Current	no	no	no	17.373	2.66667	2	Q3	8	Q4	120
174643313001	no	6	0	male	47	Married	High school	urban	Current	no	no	no	21.1536	2	0	Q2	6	Q1	0
174643313002	no	7	180	female	48	Married	High school	urban	Never	no	no	no	25.0082	2.33333	3	Q3	8	Q4	120
174643303002	no	7	80	female	51	Married	High school	urban	Never	no	no	no	21.8594	2.33333	1.33333	Q3	8	Q4	120
174643303001	no	6	0	male	50	Married	High school	urban	Current	no	no	no	23.4618	2	0	Q2	6	Q1	0
174643304002	no	8	120	female	60	Married	Elementary school and below	urban	Never	no	no	no	24.0329	2.66667	2	Q3	8	Q4	120
174643304001	no	7	60	male	63	Married	High school	urban	Current	>1m	yes	no	23.9295	2.33333	1	Q3	8	Q3	60
174643309001	no	6	0	male	68	Married	High school	urban	Never	no	no	no	23.8223	2	0	Q2	6	Q1	0
174643309002	no	8	120	female	59	Married	Elementary school and below	urban	Never	no	yes	no	24.5411	2.66667	2	Q3	8	Q4	120
174643208001	no	3	40	male	77	Non-married	Elementary school and below	rural	Current	no	yes	no	22.9113	1	0.666667	Q1	4	Q3	60
174643202001	no	8	0	male	48	Married	Elementary school and below	rural	Current	no	no	no	21.354	2.66667	0	Q3	8	Q1	0
174643202002	no	8	0	female	45	Married	Elementary school and below	rural	Never	no	no	no	22.9111	2.66667	0	Q3	8	Q1	0
174643206001	no	8	60	female	85	Non-married	Elementary school and below	rural	Never	no	yes	no	18.0141	2.66667	1	Q3	8	Q3	60
174643223001	no	6	0	female	60	Non-married	Elementary school and below	rural	Current	no	yes	yes	27.3039	2	0	Q2	6	Q1	0
174643226002	no	8	90	male	60	Married	Elementary school and below	rural	Current	no	no	no	21.5536	2.66667	1.5	Q3	8	Q4	120
174643226001	no	3	0	female	59	Married	Elementary school and below	rural	Current	no	yes	yes	27.4061	1	0	Q1	4	Q1	0
174643210001	no	2	0	female	83	Non-married	Elementary school and below	rural	Never	no	yes	no	23.034	0.666667	0	Q1	4	Q1	0
174643228002	no	8	120	male	56	Married	High school	rural	Current	>1m	no	no	21.7191	2.66667	2	Q3	8	Q4	120
174643228001	no	4	0	female	52	Married	Elementary school and below	rural	Never	no	no	no	19.6501	1.33333	0	Q1	4	Q1	0
174643218001	no	4	0	female	54	Non-married	Elementary school and below	rural	Never	no	no	yes	20.4407	1.33333	0	Q1	4	Q1	0
174643222002	no	8	0	male	67	Married	Elementary school and below	rural	Current	>1m	no	no	26.5013	2.66667	0	Q3	8	Q1	0
174643222001	no	5	0	female	59	Married	Elementary school and below	rural	Current	no	yes	no	27.4133	1.66667	0	Q1	4	Q1	0
174643209001	no	7	0	male	74	Married	Elementary school and below	rural	Never	no	no	no	24.367	2.33333	0	Q3	8	Q1	0
174643209002	yes	6	0	female	68	Married	High school	rural	Never	no	yes	no	28.4306	2	0	Q2	6	Q1	0
174643229001	no	8	0	male	57	Non-married	High school	rural	Current	>1m	no	no	20.8073	2.66667	0	Q3	8	Q1	0
174643205001	no	8	60	female	46	Married	High school	rural	Never	no	yes	no	24.5792	2.66667	1	Q3	8	Q3	60
174643207002	no	8	0	male	62	Married	Elementary school and below	rural	Current	no	no	no	18.7303	2.66667	0	Q3	8	Q1	0
174643207001	no	7	0	female	57	Married	Elementary school and below	rural	Never	no	yes	no	26.6222	2.33333	0	Q3	8	Q1	0
174643215002	no	4	60	male	74	Married	Elementary school and below	rural	Current	no	yes	no	17.455	1.33333	1	Q1	4	Q3	60
174643215001	no	8	0	female	69	Married	Elementary school and below	rural	Never	no	no	no	25.1538	2.66667	0	Q3	8	Q1	0
174643227002	no	5	0	male	64	Married	Elementary school and below	rural	Current	>1m	no	no	19.3392	1.66667	0	Q1	4	Q1	0
174643227001	no	4	30	female	59	Married	High school	rural	Current	no	no	no	23.7996	1.33333	0.5	Q1	4	Q3	60
174643219002	no	8	0	male	63	Married	Elementary school and below	rural	Current	no	no	yes	19.3133	2.66667	0	Q3	8	Q1	0
174643219001	yes	8	60	female	60	Married	Elementary school and below	rural	Never	no	yes	no	21.6839	2.66667	1	Q3	8	Q3	60
174643211001	no	6	0	male	60	Non-married	High school	rural	Current	>1m	no	no	18.711	2	0	Q2	6	Q1	0
174643213001	no	2	0	male	50	Married	Elementary school and below	rural	Current	no	no	no	17.6401	0.666667	0	Q1	4	Q1	0
174643225001	no	8	0	male	55	Married	High school	rural	Current	no	yes	yes	29.1701	2.66667	0	Q3	8	Q1	0
174643225002	no	7	0	female	52	Married	High school	rural	Never	no	no	yes	26.0567	2.33333	0	Q3	8	Q1	0
174643201002	no	8	0	male	72	Married	Elementary school and below	rural	Current	no	no	yes	16.061	2.66667	0	Q3	8	Q1	0
174643201001	no	4	120	female	64	Married	Elementary school and below	rural	Never	no	no	yes	26.709	1.33333	2	Q1	4	Q4	120
174643204001	no	8	0	male	53	divorced	High school	rural	Never	>1m	yes	no	22.0552	2.66667	0	Q3	8	Q1	0
174643220001	no	3	0	female	65	Married	Elementary school and below	rural	Current	no	no	no	20.2862	1	0	Q1	4	Q1	0
177402325002	no	8	0	male	62	Married	Elementary school and below	rural	Current	no	yes	yes	23.7872	2.66667	0	Q3	8	Q1	0
177402325001	no	6	0	female	60	Married	Elementary school and below	rural	Current	no	yes	yes	30.9456	2	0	Q2	6	Q1	0
177402306001	no	8	120	male	70	Married	Elementary school and below	rural	Current	>1m	no	no	26.2652	2.66667	2	Q3	8	Q4	120
177402306002	no	4	0	female	65	Married	High school	rural	Never	no	yes	yes	29.6747	1.33333	0	Q1	4	Q1	0
177402321002	no	6	60	female	67	Married	Elementary school and below	rural	Never	no	yes	no	21.5467	2	1	Q2	6	Q3	60
177402315001	no	8	0	female	48	Married	High school	rural	Never	no	no	no	24.5616	2.66667	0	Q3	8	Q1	0
177402310001	no	6	30	male	59	Married	High school	rural	Current	<1m	yes	no	23.8163	2	0.5	Q2	6	Q3	60
177402310002	no	5	30	female	58	Married	High school	rural	Never	no	yes	yes	29.7237	1.66667	0.5	Q1	4	Q3	60
177402320002	no	3	60	male	49	Married	High school	rural	Current	no	no	no	19.7313	1	1	Q1	4	Q3	60
177402320001	no	8	120	female	47	Married	High school	rural	Never	no	no	no	21.829	2.66667	2	Q3	8	Q4	120
177402314002	no	8	0	male	50	Married	High school	rural	Current	no	yes	no	26.6332	2.66667	0	Q3	8	Q1	0
177402314001	no	7	0	female	50	Married	High school	rural	Never	no	no	no	20.793	2.33333	0	Q3	8	Q1	0
177402323002	no	6	120	male	60	Married	Elementary school and below	rural	Current	<1m	yes	no	22.1827	2	2	Q2	6	Q4	120
177402323001	no	8	90	female	60	Married	Elementary school and below	rural	Never	no	yes	no	26.851	2.66667	1.5	Q3	8	Q4	120
177402301002	no	8	60	male	51	Married	High school	rural	Current	>1m	no	no	20.2018	2.66667	1	Q3	8	Q3	60
177402301001	no	8	60	female	48	Married	High school	rural	Never	no	no	no	27.7149	2.66667	1	Q3	8	Q3	60
177402319002	no	5	0	female	63	Married	Elementary school and below	rural	Never	no	no	no	25.7541	1.66667	0	Q1	4	Q1	0
177402309002	no	7	90	male	49	Married	Elementary school and below	rural	Current	no	no	no	20.3718	2.33333	1.5	Q3	8	Q4	120
177402309001	no	4	0	female	48	Married	Elementary school and below	rural	Never	no	no	no	32.8442	1.33333	0	Q1	4	Q1	0
177402324001	no	5	0	female	62	Married	Elementary school and below	rural	Current	no	no	no	20.9842	1.66667	0	Q1	4	Q1	0
177402324002	no	3	5	male	62	Married	Elementary school and below	rural	Current	no	no	no	23.1405	1	0.0833333	Q1	4	Q3	60
177402313001	no	6	0	male	59	Married	Elementary school and below	rural	Never	no	no	no	24.2103	2	0	Q2	6	Q1	0
177402313002	no	8	90	female	70	Married	Elementary school and below	rural	Never	no	yes	no	23.3913	2.66667	1.5	Q3	8	Q4	120
177402312002	no	7	60	male	48	Married	High school	rural	Current	>1m	no	no	24.8433	2.33333	1	Q3	8	Q3	60
177402312001	no	7	0	female	45	Married	High school	rural	Never	no	no	no	26.0199	2.33333	0	Q3	8	Q1	0
177402311002	no	8	120	male	66	Married	High school	rural	Current	no	no	no	19.9839	2.66667	2	Q3	8	Q4	120
177402311001	yes	3	0	female	65	Married	Elementary school and below	rural	Never	no	no	no	17.9753	1	0	Q1	4	Q1	0
177402304002	no	8	0	female	66	Married	Elementary school and below	rural	Current	no	no	no	27.874	2.66667	0	Q3	8	Q1	0
177402304001	no	7	80	male	68	Married	Elementary school and below	rural	Current	no	yes	no	25.1098	2.33333	1.33333	Q3	8	Q4	120
177402316001	no	7	60	male	47	Married	High school	rural	Current	no	no	yes	28.089	2.33333	1	Q3	8	Q3	60
177402316002	no	8	180	female	46	Married	Elementary school and below	rural	Never	no	no	no	21.8038	2.66667	3	Q3	8	Q4	120
177402302001	no	5	0	male	57	Married	Elementary school and below	rural	Current	no	no	no	25.9531	1.66667	0	Q1	4	Q1	0
177402302002	no	5	0	female	56	Married	Elementary school and below	rural	Never	no	no	no	20.4335	1.66667	0	Q1	4	Q1	0
177402317001	no	10	0	male	58	Married	High school	rural	Current	>1m	yes	no	19.9521	3.33333	0	Q4	9	Q1	0
177402303001	no	6	0	male	48	Married	High school	rural	Never	no	no	no	24.1779	2	0	Q2	6	Q1	0
177402303002	no	8	0	female	46	Married	Elementary school and below	rural	Never	no	no	no	23.1916	2.66667	0	Q3	8	Q1	0
177402307002	no	7	30	female	50	Married	Elementary school and below	rural	Never	no	yes	no	25.7456	2.33333	0.5	Q3	8	Q3	60
177402123002	no	5	30	male	48	Married	Elementary school and below	rural	Current	no	no	no	19.8985	1.66667	0.5	Q1	4	Q3	60
177402103001	no	7	120	male	46	Non-married	High school	rural	Current	no	no	no	25.0762	2.33333	2	Q3	8	Q4	120
177402122002	no	5	0	male	47	Married	Elementary school and below	rural	Current	no	no	no	23.7309	1.66667	0	Q1	4	Q1	0
177402122001	no	4	30	female	48	Married	Elementary school and below	rural	Never	no	no	no	24.8442	1.33333	0.5	Q1	4	Q3	60
177402120001	no	10	60	female	60	Non-married	Elementary school and below	rural	Never	no	yes	no	23.1659	3.33333	1	Q4	9	Q3	60
177402116001	no	9	60	male	48	Non-married	High school	rural	Former	>1m	yes	no	24.0346	3	1	Q4	9	Q3	60
177402113002	no	6	0	male	54	Married	High school	rural	Current	>1m	no	no	21.1828	2	0	Q2	6	Q1	0
177402110001	no	5	0	female	63	Non-married	Elementary school and below	rural	Never	no	yes	yes	19.8714	1.66667	0	Q1	4	Q1	0
177402115002	no	4	120	female	61	Married	Elementary school and below	rural	Current	no	yes	no	21.0834	1.33333	2	Q1	4	Q4	120
177402125002	no	7	2	female	55	Married	Elementary school and below	rural	Never	no	no	no	25.3679	2.33333	0.0333333	Q3	8	Q3	60
177402111002	no	3	30	male	70	Married	Elementary school and below	rural	Never	no	no	no	18.1317	1	0.5	Q1	4	Q3	60
177402111001	yes	3	0	male	71	Married	High school	rural	Current	no	no	yes	22.9857	1	0	Q1	4	Q1	0
177402105002	yes	8	0	female	70	Married	Elementary school and below	rural	Never	no	yes	no	18.3496	2.66667	0	Q3	8	Q1	0
177402105001	no	11	0	male	74	Married	Elementary school and below	rural	Current	no	no	no	19.5193	3.66667	0	Q4	9	Q1	0
177402121002	no	3	0	female	64	Married	Elementary school and below	rural	Current	no	yes	no	21.0828	1	0	Q1	4	Q1	0
177402114001	no	7	1	female	49	Married	Elementary school and below	rural	Never	no	yes	no	29.9767	2.33333	0.0166667	Q3	8	Q2	1
177402114002	no	9	40	male	49	Married	High school	rural	Current	<1m	no	no	20.7965	3	0.666667	Q4	9	Q3	60
177402118001	no	5	30	male	53	Married	High school	rural	Current	>1m	yes	no	19.2006	1.66667	0.5	Q1	4	Q3	60
177402118002	no	10	0	female	51	Married	High school	rural	Current	no	no	no	25.835	3.33333	0	Q4	9	Q1	0
177402107001	no	7	0	male	51	Married	High school	rural	Current	<1m	no	no	22.8988	2.33333	0	Q3	8	Q1	0
177402107002	no	6	0	female	51	Married	High school	rural	Never	no	no	no	23.7621	2	0	Q2	6	Q1	0
177402124002	no	7	40	male	62	Married	High school	rural	Current	>1m	yes	no	27.7701	2.33333	0.666667	Q3	8	Q3	60
177402104001	no	10	60	male	55	Married	Elementary school and below	rural	Never	no	yes	no	28.7921	3.33333	1	Q4	9	Q3	60
177402104002	no	7	0	female	53	Married	Elementary school and below	rural	Never	no	yes	yes	28.2875	2.33333	0	Q3	8	Q1	0
177402117001	no	2	60	female	74	Non-married	Elementary school and below	rural	Never	no	yes	no	23.0431	0.666667	1	Q1	4	Q3	60
177402106001	no	4	0	female	61	Non-married	Elementary school and below	rural	Current	no	yes	yes	27.6304	1.33333	0	Q1	4	Q1	0
177402112001	no	8	0	male	47	Married	Elementary school and below	rural	Never	>1m	no	no	25.8555	2.66667	0	Q3	8	Q1	0
177402112002	no	8	60	female	46	Married	Elementary school and below	rural	Never	no	no	no	29.5827	2.66667	1	Q3	8	Q3	60
177402102002	no	8	60	male	50	Married	Elementary school and below	rural	Current	no	no	no	27.0416	2.66667	1	Q3	8	Q3	60
177402109002	no	7	0	male	53	Married	High school	rural	Current	no	no	no	22.449	2.33333	0	Q3	8	Q1	0
177402101001	no	8	60	male	48	Married	Elementary school and below	rural	Current	>1m	no	no	19.2971	2.66667	1	Q3	8	Q3	60
177402227001	no	8	0	male	57	Married	Elementary school and below	urban	Never	no	no	no	26.306	2.66667	0	Q3	8	Q1	0
177402227002	no	11	0	female	53	Married	Elementary school and below	urban	Never	no	yes	no	28.6404	3.66667	0	Q4	9	Q1	0
177402213001	no	8	0	male	50	Non-married	Elementary school and below	urban	Never	no	no	no	23.5274	2.66667	0	Q3	8	Q1	0
177402217002	no	9	60	male	51	Married	High school	urban	Never	no	yes	no	27.2876	3	1	Q4	9	Q3	60
177402217001	no	8	120	female	51	Married	High school	urban	Never	no	yes	yes	26.6608	2.66667	2	Q3	8	Q4	120
177402212002	no	10	0	male	54	Married	High school	urban	Never	no	no	no	26.8946	3.33333	0	Q4	9	Q1	0
177402212001	no	4	0	female	54	Married	High school	urban	Never	no	no	no	23.083	1.33333	0	Q1	4	Q1	0
177402221002	no	7	60	male	59	Married	Elementary school and below	urban	Never	no	yes	yes	24.8535	2.33333	1	Q3	8	Q3	60
177402221001	no	6	0	female	55	Married	Elementary school and below	urban	Never	no	no	no	25.8673	2	0	Q2	6	Q1	0
177402202002	no	6	0	female	47	Married	High school	urban	Never	no	no	no	26.8727	2	0	Q2	6	Q1	0
177402220001	no	8	0	male	52	Married	High school	urban	Current	no	no	no	22.8062	2.66667	0	Q3	8	Q1	0
177402220002	no	8	0	female	51	Married	High school	urban	Never	no	yes	no	26.607	2.66667	0	Q3	8	Q1	0
177402216001	no	9	120	male	60	Married	High school	urban	Current	>1m	no	no	29.0343	3	2	Q4	9	Q4	120
177402216002	no	8	60	female	57	Married	Elementary school and below	urban	Never	no	yes	yes	26.8453	2.66667	1	Q3	8	Q3	60
177402223002	no	5	0	male	48	Married	High school	urban	Current	no	no	no	19.7872	1.66667	0	Q1	4	Q1	0
177402218001	no	6	0	male	60	Married	High school	urban	Current	no	yes	no	25.7465	2	0	Q2	6	Q1	0
177402218002	no	6	90	female	51	Married	High school	urban	Never	no	no	no	29.4452	2	1.5	Q2	6	Q4	120
177402226001	no	5	60	female	73	Non-married	Elementary school and below	urban	Current	no	yes	no	22.5292	1.66667	1	Q1	4	Q3	60
177402224001	no	6	0	female	66	Non-married	Elementary school and below	urban	Current	no	yes	no	21.2976	2	0	Q2	6	Q1	0
177402210002	no	7	0	female	50	Married	Elementary school and below	urban	Never	no	yes	no	32.9816	2.33333	0	Q3	8	Q1	0
177402210001	no	8	0	male	50	Married	High school	urban	Never	no	yes	no	28.8396	2.66667	0	Q3	8	Q1	0
177402207001	no	3	0	female	67	Non-married	Elementary school and below	urban	Former	no	yes	no	21.9825	1	0	Q1	4	Q1	0
177402229001	no	7	0	female	79	Non-married	Elementary school and below	urban	Current	no	yes	no	24.3536	2.33333	0	Q3	8	Q1	0
177402206001	no	6	120	female	49	Married	Elementary school and below	urban	Never	no	no	no	24.3479	2	2	Q2	6	Q4	120
177402214001	no	6	60	female	72	Non-married	Elementary school and below	urban	Never	no	yes	no	21.2254	2	1	Q2	6	Q3	60
177402208001	no	6	0	male	60	Married	High school	urban	Current	<1m	yes	no	24.2559	2	0	Q2	6	Q1	0
177402208002	no	8	60	female	58	Married	High school	urban	Current	no	yes	no	22.5297	2.66667	1	Q3	8	Q3	60
177402219001	no	5	0	male	78	Non-married	High school	urban	Former	>1m	yes	no	23.8798	1.66667	0	Q1	4	Q1	0
177402209002	no	7	0	female	45	Married	High school	urban	Never	no	yes	no	22.8013	2.33333	0	Q3	8	Q1	0
177402205002	no	7	0	female	60	Married	Elementary school and below	urban	Current	no	yes	no	28.9569	2.33333	0	Q3	8	Q1	0
177402203001	no	9	120	male	46	Married	Elementary school and below	urban	Current	no	yes	no	20.6959	3	2	Q4	9	Q4	120
177402203002	no	8	60	female	45	Married	High school	urban	Never	no	yes	no	31.958	2.66667	1	Q3	8	Q3	60
177402201001	no	8	0	male	46	Married	High school	urban	Current	no	yes	no	28.0358	2.66667	0	Q3	8	Q1	0
177402201002	no	8	0	female	51	Married	Elementary school and below	urban	Never	no	no	no	21.6491	2.66667	0	Q3	8	Q1	0
177402222001	no	6	0	female	47	Married	High school	urban	Never	no	yes	no	23.6628	2	0	Q2	6	Q1	0
177402225001	no	7	60	female	55	Married	Elementary school and below	urban	Never	no	yes	no	28.0466	2.33333	1	Q3	8	Q3	60
177402211001	no	8	120	female	50	Non-married	Elementary school and below	urban	Never	no	yes	no	21.8367	2.66667	2	Q3	8	Q4	120
104004304001	no	8	60	male	78	Married	High school	urban	Former	<1m	no	no	16.3474	2.66667	1	Q3	8	Q3	60
104004318001	no	7	1	male	75	Married	High school	urban	Never	no	no	no	17.8149	2.33333	0.0166667	Q3	8	Q2	1
104004318002	no	8	0	female	69	Married	college and higher	urban	Never	no	yes	yes	27.5391	2.66667	0	Q3	8	Q1	0
104004301001	no	8	2	male	51	Married	college and higher	urban	Current	>1m	no	no	22.2491	2.66667	0.0333333	Q3	8	Q3	60
104004116001	no	7	1	female	70	Non-married	High school	urban	Never	<1m	no	yes	25.3203	2.33333	0.0166667	Q3	8	Q2	1
104004104001	no	8	1	male	78	Married	High school	urban	Current	no	yes	yes	23.7335	2.66667	0.0166667	Q3	8	Q2	1
104004102002	yes	7	30	female	73	Married	Elementary school and below	urban	Never	no	yes	yes	21.4199	2.33333	0.5	Q3	8	Q3	60
104004103002	no	6	1	female	61	Married	High school	urban	Never	no	no	yes	23.4952	2	0.0166667	Q2	6	Q2	1
104004103001	no	6	1	male	65	Married	Elementary school and below	urban	Former	>1m	no	no	25.8087	2	0.0166667	Q2	6	Q2	1
104004110002	no	8	1	male	77	Married	High school	urban	Never	no	yes	yes	26.2244	2.66667	0.0166667	Q3	8	Q2	1
104004110001	no	7	2	female	80	Married	Elementary school and below	urban	Former	no	yes	no	30.9903	2.33333	0.0333333	Q3	8	Q3	60
104004203001	no	7	15	male	69	Married	High school	urban	Never	no	no	no	24.7898	2.33333	0.25	Q3	8	Q3	60
104004212002	no	7	1	female	47	Married	college and higher	urban	Never	<1m	no	no	21.4722	2.33333	0.0166667	Q3	8	Q2	1
104004214001	no	7	20	female	74	Non-married	college and higher	urban	Never	no	no	no	25.4176	2.33333	0.333333	Q3	8	Q3	60
104004205001	no	9	1	female	47	Married	college and higher	urban	Never	<1m	no	no	21.9355	3	0.0166667	Q4	9	Q2	1
104004207002	no	8	1	female	51	Married	High school	urban	Never	no	yes	yes	36.7328	2.66667	0.0166667	Q3	8	Q2	1
104004211001	no	3	0	female	67	Non-married	High school	urban	Never	no	yes	no	29.4456	1	0	Q1	4	Q1	0
104004202001	no	7	1	male	65	Married	High school	urban	Former	no	no	no	26.569	2.33333	0.0166667	Q3	8	Q2	1
104004202002	no	6	0	female	64	Married	High school	urban	Never	no	no	no	26.1005	2	0	Q2	6	Q1	0
105381207002	no	5	30	male	65	Married	Elementary school and below	rural	Never	no	yes	no	21.7845	1.66667	0.5	Q1	4	Q3	60
105381207001	no	6	30	female	60	Married	Elementary school and below	rural	Never	no	no	yes	24.8833	2	0.5	Q2	6	Q3	60
105381216002	no	7	30	male	60	Married	High school	rural	Current	<1m	no	no	25.7018	2.33333	0.5	Q3	8	Q3	60
105381213001	no	8	150	female	47	Married	Elementary school and below	rural	Never	>1m	no	no	25.3695	2.66667	2.5	Q3	8	Q4	120
105381204002	yes	5	20	female	50	Married	High school	rural	Never	no	no	no	21.6857	1.66667	0.333333	Q1	4	Q3	60
105381215001	no	10	120	female	45	Married	Elementary school and below	rural	Current	>1m	no	no	17.7969	3.33333	2	Q4	9	Q4	120
105381212002	no	5	60	female	57	Married	Elementary school and below	rural	Never	no	yes	no	25.8901	1.66667	1	Q1	4	Q3	60
105381214002	no	5	60	male	52	Married	Elementary school and below	rural	Current	>1m	yes	no	19.5227	1.66667	1	Q1	4	Q3	60
105381214001	no	6	90	female	48	Married	Elementary school and below	rural	Current	no	yes	no	21.8017	2	1.5	Q2	6	Q4	120
105381228001	no	8	120	male	67	Married	High school	rural	Current	no	no	yes	21.795	2.66667	2	Q3	8	Q4	120
105381221001	no	7	0	female	57	Non-married	Elementary school and below	rural	Former	no	yes	no	23.5546	2.33333	0	Q3	8	Q1	0
105381203002	no	7	0	female	52	Married	Elementary school and below	rural	Never	no	no	yes	28.9987	2.33333	0	Q3	8	Q1	0
105381206001	no	7	60	female	48	Married	High school	rural	Never	no	no	no	21.8043	2.33333	1	Q3	8	Q3	60
105381208002	no	3	0	male	54	Married	Elementary school and below	rural	Never	no	no	yes	27.2787	1	0	Q1	4	Q1	0
105381208001	no	6	30	female	55	Married	Elementary school and below	rural	Never	no	no	no	22.1323	2	0.5	Q2	6	Q3	60
105381211001	no	6	60	female	46	Married	Elementary school and below	rural	Never	no	yes	no	29.2117	2	1	Q2	6	Q3	60
105381210001	no	6	60	male	51	Married	Elementary school and below	rural	Current	no	no	no	21.2932	2	1	Q2	6	Q3	60
105381210002	no	8	60	female	51	Married	Elementary school and below	rural	Never	no	no	no	22.6244	2.66667	1	Q3	8	Q3	60
105381205002	no	8	40	female	50	Married	Elementary school and below	rural	Never	<1m	yes	yes	26.6031	2.66667	0.666667	Q3	8	Q3	60
105381222001	no	6	20	male	53	Married	High school	rural	Never	no	yes	no	26.341	2	0.333333	Q2	6	Q3	60
105381222002	no	5	30	female	53	Married	High school	rural	Never	no	yes	no	21.9455	1.66667	0.5	Q1	4	Q3	60
105381226001	no	7	90	female	58	Married	Elementary school and below	rural	Never	no	no	yes	21.453	2.33333	1.5	Q3	8	Q4	120
105381326001	no	6	120	male	48	Married	High school	urban	Never	>1m	no	yes	25.9738	2	2	Q2	6	Q4	120
105381326002	no	8	120	female	47	Married	High school	urban	Never	no	yes	yes	30.3271	2.66667	2	Q3	8	Q4	120
105381302002	no	6	30	female	57	Married	Elementary school and below	urban	Never	>1m	no	no	23.087	2	0.5	Q2	6	Q3	60
105381302001	no	8	120	male	57	Married	Elementary school and below	urban	Current	>1m	no	no	22.7635	2.66667	2	Q3	8	Q4	120
105381324001	no	7	70	male	61	Married	High school	urban	Former	>1m	no	no	25.0762	2.33333	1.16667	Q3	8	Q4	120
105381324002	no	7	70	female	59	Married	Elementary school and below	urban	Never	>1m	no	no	19.3954	2.33333	1.16667	Q3	8	Q4	120
105381304002	no	7	0	male	54	Married	college and higher	urban	Never	<1m	no	no	22.4001	2.33333	0	Q3	8	Q1	0
105381304001	no	7	0	female	54	Married	High school	urban	Never	no	yes	no	29.368	2.33333	0	Q3	8	Q1	0
105381311002	no	4	20	female	47	Married	Elementary school and below	urban	Never	no	no	no	24.3225	1.33333	0.333333	Q1	4	Q3	60
105381319002	no	6	60	male	55	Married	High school	urban	Current	<1m	no	no	25.3981	2	1	Q2	6	Q3	60
105381319001	no	7	30	female	55	Married	Elementary school and below	urban	Never	<1m	no	no	24.7594	2.33333	0.5	Q3	8	Q3	60
105381301002	no	7	60	male	49	Married	High school	urban	Never	<1m	no	no	22.8575	2.33333	1	Q3	8	Q3	60
105381301001	no	7	60	female	48	Married	High school	urban	Never	no	no	yes	27.3148	2.33333	1	Q3	8	Q3	60
105381309002	no	7	60	male	51	Married	Elementary school and below	urban	Current	<1m	yes	yes	31.8047	2.33333	1	Q3	8	Q3	60
105381309001	no	7	60	female	49	Married	High school	urban	Never	no	no	yes	24.4589	2.33333	1	Q3	8	Q3	60
105381325001	no	7	0	male	57	Married	High school	urban	Current	>1m	no	yes	21.7239	2.33333	0	Q3	8	Q1	0
105381312002	no	6	0	male	60	Married	Elementary school and below	urban	Former	>1m	no	no	25.0233	2	0	Q2	6	Q1	0
105381312001	no	5	30	female	69	Married	Elementary school and below	urban	Never	no	yes	yes	25.3889	1.66667	0.5	Q1	4	Q3	60
105381310002	no	8	90	male	67	Married	High school	urban	Former	>1m	no	yes	22.3531	2.66667	1.5	Q3	8	Q4	120
105381310001	no	10	90	female	68	Married	Elementary school and below	urban	Never	<1m	no	no	25.471	3.33333	1.5	Q4	9	Q4	120
105381305001	no	6	60	female	69	Non-married	Elementary school and below	urban	Never	no	no	no	27.1781	2	1	Q2	6	Q3	60
105381323001	no	8	90	female	65	Married	High school	urban	Never	no	yes	no	26.4108	2.66667	1.5	Q3	8	Q4	120
105381317002	no	7	60	male	54	Married	High school	urban	Current	>1m	no	no	21.9056	2.33333	1	Q3	8	Q3	60
105381313001	no	7	60	female	54	Married	Elementary school and below	urban	Current	<1m	no	no	27.2791	2.33333	1	Q3	8	Q3	60
105381313002	no	5	30	male	53	Married	High school	urban	Never	no	no	no	27.2724	1.66667	0.5	Q1	4	Q3	60
105381320001	no	4	30	female	76	Married	Elementary school and below	urban	Never	no	no	no	20.7934	1.33333	0.5	Q1	4	Q3	60
108259314001	no	4	1	female	64	Non-married	Elementary school and below	urban	Never	no	yes	no	22.3121	1.33333	0.0166667	Q1	4	Q2	1
108259326001	no	4	120	male	65	Married	Elementary school and below	urban	Never	no	no	no	29.9313	1.33333	2	Q1	4	Q4	120
108259326002	no	8	0	female	61	Married	Elementary school and below	urban	Never	no	yes	yes	28.0082	2.66667	0	Q3	8	Q1	0
108259325001	no	6	1	male	54	divorced	Elementary school and below	urban	Never	no	no	no	22.498	2	0.0166667	Q2	6	Q2	1
108259318002	no	7	2	male	54	Married	Elementary school and below	urban	Current	<1m	yes	yes	28.5895	2.33333	0.0333333	Q3	8	Q3	60
108259302001	no	4	30	female	57	Married	Elementary school and below	urban	Never	no	yes	no	28.0229	1.33333	0.5	Q1	4	Q3	60
108259306002	no	7	2	male	56	Married	High school	urban	Never	no	yes	no	29.2822	2.33333	0.0333333	Q3	8	Q3	60
108259306001	no	7	2	female	54	Married	High school	urban	Never	no	no	no	28.1476	2.33333	0.0333333	Q3	8	Q3	60
108259317001	yes	4	0	female	49	Married	High school	urban	Never	no	yes	no	22.2496	1.33333	0	Q1	4	Q1	0
108259310002	no	8	1	male	64	Married	High school	urban	Current	>1m	no	no	23.7356	2.66667	0.0166667	Q3	8	Q2	1
108259310001	no	5	1	female	57	Married	Elementary school and below	urban	Never	no	yes	no	28.5805	1.66667	0.0166667	Q1	4	Q2	1
108259319001	no	4	0	male	59	Married	Elementary school and below	urban	Former	<1m	no	no	48.6282	1.33333	0	Q1	4	Q1	0
108259319002	no	5	1	female	53	Married	Elementary school and below	urban	Never	no	yes	yes	27.2656	1.66667	0.0166667	Q1	4	Q2	1
108259323001	no	10	150	male	47	Married	Elementary school and below	urban	Current	>1m	yes	no	25.4523	3.33333	2.5	Q4	9	Q4	120
108259323002	no	6	0	female	46	Married	High school	urban	Current	no	no	yes	25.5766	2	0	Q2	6	Q1	0
108259327001	no	5	0	male	51	Married	High school	urban	Current	no	no	no	24.2243	1.66667	0	Q1	4	Q1	0
108259327002	no	3	0	female	51	Married	High school	urban	Never	no	no	yes	26.5625	1	0	Q1	4	Q1	0
108259308001	no	8	90	male	47	Married	High school	urban	Former	>1m	yes	yes	26.7791	2.66667	1.5	Q3	8	Q4	120
108259308002	no	8	0	female	45	Married	High school	urban	Never	no	no	no	24.1878	2.66667	0	Q3	8	Q1	0
108259332001	no	6	30	male	51	Married	High school	urban	Never	>1m	yes	no	29.3982	2	0.5	Q2	6	Q3	60
108259301001	no	6	0	male	48	Married	college and higher	urban	Never	>1m	yes	yes	28.5121	2	0	Q2	6	Q1	0
108259301002	no	5	1	female	48	Married	High school	urban	Never	no	no	no	23.7871	1.66667	0.0166667	Q1	4	Q2	1
108259322001	no	8	0	female	63	Non-married	High school	urban	Never	no	yes	yes	28.2413	2.66667	0	Q3	8	Q1	0
108259305001	no	10	1	male	60	Married	Elementary school and below	urban	Current	<1m	no	no	22.782	3.33333	0.0166667	Q4	9	Q2	1
108259305002	no	4	1	female	59	Married	Elementary school and below	urban	Never	no	yes	yes	26.8352	1.33333	0.0166667	Q1	4	Q2	1
108259329001	no	7	60	female	57	Married	Elementary school and below	urban	Never	no	yes	no	24.8059	2.33333	1	Q3	8	Q3	60
108259311001	no	7	0	male	48	Married	High school	urban	Never	<1m	no	no	27.6666	2.33333	0	Q3	8	Q1	0
108259311002	no	4	1	female	48	Married	Elementary school and below	urban	Never	no	yes	no	23.6244	1.33333	0.0166667	Q1	4	Q2	1
108259307001	no	7	1	female	55	Married	High school	urban	Current	no	yes	no	29.7656	2.33333	0.0166667	Q3	8	Q2	1
108259307002	no	8	1	male	52	Married	college and higher	urban	Never	>1m	yes	no	25.9109	2.66667	0.0166667	Q3	8	Q2	1
108259324001	no	7	60	male	56	Married	High school	urban	Former	no	no	no	26.1037	2.33333	1	Q3	8	Q3	60
108259125001	no	7	1	male	77	Married	Elementary school and below	rural	Never	no	yes	no	23.7885	2.33333	0.0166667	Q3	8	Q2	1
108259125002	no	6	1	female	70	Married	Elementary school and below	rural	Never	no	no	no	26.7707	2	0.0166667	Q2	6	Q2	1
108259103002	no	3	1	male	63	Married	Elementary school and below	rural	Current	no	no	no	24.0575	1	0.0166667	Q1	4	Q2	1
108259103001	yes	3	0	female	64	Married	Elementary school and below	rural	Never	no	no	no	25.9671	1	0	Q1	4	Q1	0
108259129001	no	7	60	male	70	Married	Elementary school and below	rural	Current	no	yes	no	25.6985	2.33333	1	Q3	8	Q3	60
108259129002	no	4	60	female	64	Married	Elementary school and below	rural	Never	no	yes	no	27.7138	1.33333	1	Q1	4	Q3	60
108259126001	no	6	120	male	49	Married	Elementary school and below	rural	Current	no	no	no	35.5946	2	2	Q2	6	Q4	120
108259132002	no	6	30	male	56	Married	High school	rural	Current	<1m	no	no	12.52	2	0.5	Q2	6	Q3	60
108259132001	no	6	0	female	49	Married	High school	rural	Current	no	yes	no	28.3467	2	0	Q2	6	Q1	0
108259107001	no	3	30	male	56	Married	Elementary school and below	rural	Former	no	yes	no	30.2592	1	0.5	Q1	4	Q3	60
108259107002	no	7	0	female	48	Married	Elementary school and below	rural	Former	no	yes	yes	27.6051	2.33333	0	Q3	8	Q1	0
108259112001	no	5	60	female	45	Married	Elementary school and below	rural	Never	no	yes	no	25.8541	1.66667	1	Q1	4	Q3	60
108259131002	no	5	1	male	67	Married	Elementary school and below	rural	Never	no	no	no	24.293	1.66667	0.0166667	Q1	4	Q2	1
108259131001	no	7	1	female	59	Married	Elementary school and below	rural	Never	no	yes	no	31.2974	2.33333	0.0166667	Q3	8	Q2	1
108259115001	no	5	1	male	58	Married	Elementary school and below	rural	Current	>1m	yes	no	22.9155	1.66667	0.0166667	Q1	4	Q2	1
108259115002	yes	2	0	female	55	Married	Elementary school and below	rural	Never	no	yes	yes	26.8386	0.666667	0	Q1	4	Q1	0
108259101002	no	4	1	female	83	Married	High school	rural	Never	no	no	no	24.7818	1.33333	0.0166667	Q1	4	Q2	1
108259134001	no	7	60	male	52	Married	Elementary school and below	rural	Never	>1m	yes	no	18.6356	2.33333	1	Q3	8	Q3	60
108259134002	no	7	60	female	49	Married	Elementary school and below	rural	Never	>1m	yes	no	35.3962	2.33333	1	Q3	8	Q3	60
108259111002	no	7	120	male	57	Married	High school	rural	Current	>1m	yes	no	22.5915	2.33333	2	Q3	8	Q4	120
108259111001	no	7	0	female	53	Married	Elementary school and below	rural	Current	no	yes	yes	22.8521	2.33333	0	Q3	8	Q1	0
108259113001	no	3	60	male	45	Married	Elementary school and below	rural	Current	>1m	yes	no	25.7589	1	1	Q1	4	Q3	60
108259120001	no	7	60	male	54	Married	High school	rural	Never	>1m	yes	no	27.4911	2.33333	1	Q3	8	Q3	60
108259120002	no	5	10	female	53	Married	High school	rural	Never	no	no	no	24.7541	1.66667	0.166667	Q1	4	Q3	60
108259108001	no	8	60	male	58	Married	Elementary school and below	rural	Never	>1m	yes	yes	28.362	2.66667	1	Q3	8	Q3	60
108259108002	no	8	0	female	59	Married	High school	rural	Never	no	no	no	28.5662	2.66667	0	Q3	8	Q1	0
108259127002	no	7	1	male	60	Married	Elementary school and below	rural	Current	>1m	no	no	21.1971	2.33333	0.0166667	Q3	8	Q2	1
108259127001	no	6	1	female	57	Married	Elementary school and below	rural	Never	no	yes	no	27.3011	2	0.0166667	Q2	6	Q2	1
108259214001	yes	6	0	female	45	Married	High school	urban	Never	no	no	no	21.7008	2	0	Q2	6	Q1	0
108259212002	no	7	0	male	47	Married	High school	urban	Former	no	no	no	21.8754	2.33333	0	Q3	8	Q1	0
108259237002	no	6	0	male	47	Married	High school	urban	Current	>1m	no	no	23.7247	2	0	Q2	6	Q1	0
108259237001	no	4	0	female	45	Married	Elementary school and below	urban	Never	no	no	no	25.9904	1.33333	0	Q1	4	Q1	0
108259233001	yes	4	0	male	61	Non-married	Elementary school and below	urban	Never	no	yes	no	27.5297	1.33333	0	Q1	4	Q1	0
108259217002	no	7	60	male	51	Married	High school	urban	Current	>1m	no	no	22.0181	2.33333	1	Q3	8	Q3	60
108259217001	no	6	0	female	54	Married	Elementary school and below	urban	Never	no	no	yes	21.3243	2	0	Q2	6	Q1	0
108259220001	no	8	60	male	57	Married	Elementary school and below	urban	Current	>1m	yes	no	21.8887	2.66667	1	Q3	8	Q3	60
108259220002	no	6	0	female	47	Married	Elementary school and below	urban	Never	no	no	no	26.3029	2	0	Q2	6	Q1	0
108259239002	no	7	1	male	46	Married	High school	urban	Current	>1m	no	no	23.55	2.33333	0.0166667	Q3	8	Q2	1
108259239001	no	6	1	female	45	Married	Elementary school and below	urban	Never	no	no	no	26.3506	2	0.0166667	Q2	6	Q2	1
108259211002	no	4	60	male	57	Married	Elementary school and below	urban	Never	<1m	no	no	21.4744	1.33333	1	Q1	4	Q3	60
108259211001	no	5	0	female	60	Married	Elementary school and below	urban	Current	no	no	no	21.2633	1.66667	0	Q1	4	Q1	0
108259222001	no	5	1	female	74	Married	Elementary school and below	urban	Never	no	yes	no	24.0813	1.66667	0.0166667	Q1	4	Q2	1
108259243002	no	7	0	female	56	Married	Elementary school and below	urban	Former	no	yes	no	28.1233	2.33333	0	Q3	8	Q1	0
108259244001	no	8	1	male	72	Married	Elementary school and below	urban	Never	no	yes	no	23.8694	2.66667	0.0166667	Q3	8	Q2	1
108259244002	yes	4	1	female	64	Married	Elementary school and below	urban	Current	no	yes	no	26.0656	1.33333	0.0166667	Q1	4	Q2	1
108259213002	no	8	0	male	64	Married	High school	urban	Current	>1m	yes	no	25.5558	2.66667	0	Q3	8	Q1	0
108259213001	yes	4	0	female	58	Married	Elementary school and below	urban	Former	no	no	no	24.5417	1.33333	0	Q1	4	Q1	0
108259226002	no	6	1	female	62	Married	Elementary school and below	urban	Never	no	yes	yes	26.9425	2	0.0166667	Q2	6	Q2	1
108259238001	no	8	0	male	50	Married	High school	urban	Former	no	yes	no	24.1749	2.66667	0	Q3	8	Q1	0
108259238002	yes	6	0	female	46	Married	High school	urban	Never	no	no	no	23.9874	2	0	Q2	6	Q1	0
108259230002	no	7	10	male	69	Married	High school	urban	Current	>1m	no	yes	23.5257	2.33333	0.166667	Q3	8	Q3	60
108259230001	no	5	0	female	66	Married	Elementary school and below	urban	Never	no	yes	no	31.1458	1.66667	0	Q1	4	Q1	0
108259235002	no	7	1	male	52	Married	Elementary school and below	urban	Current	>1m	no	no	25.3186	2.33333	0.0166667	Q3	8	Q2	1
108259235001	no	5	1	female	47	Married	High school	urban	Never	no	no	yes	26.7971	1.66667	0.0166667	Q1	4	Q2	1
108259225002	no	4	1	female	61	Married	Elementary school and below	urban	Never	no	no	no	25.9601	1.33333	0.0166667	Q1	4	Q2	1
108259215002	no	6	0	male	51	Married	High school	urban	Current	>1m	yes	no	24.8735	2	0	Q2	6	Q1	0
108259215001	no	10	120	female	53	Married	Elementary school and below	urban	Never	no	yes	yes	30.1424	3.33333	2	Q4	9	Q4	120
108259207002	no	9	30	male	51	Married	High school	urban	Never	>1m	no	no	26.0113	3	0.5	Q4	9	Q3	60
108259207001	no	6	30	female	48	Married	High school	urban	Never	no	no	no	28.7438	2	0.5	Q2	6	Q3	60
108206212001	no	6	0	male	46	Married	High school	rural	Current	>1m	no	no	20.8414	2	0	Q2	6	Q1	0
108206204001	no	9	60	female	45	Married	High school	rural	Current	>1m	yes	no	24.1609	3	1	Q4	9	Q3	60
108206204002	no	1	0	male	46	Married	Elementary school and below	rural	Never	no	no	no	23.8566	0.333333	0	Q1	4	Q1	0
108206224001	no	7	0	male	61	Non-married	Elementary school and below	rural	Current	>1m	yes	no	22.0363	2.33333	0	Q3	8	Q1	0
108206211001	no	4	0	male	74	Non-married	Elementary school and below	rural	Former	>1m	yes	no	20.911	1.33333	0	Q1	4	Q1	0
108206222002	no	5	0	female	54	Married	Elementary school and below	rural	Never	no	no	no	25.1782	1.66667	0	Q1	4	Q1	0
108206217002	no	7	90	male	46	Married	High school	rural	Current	>1m	no	no	26.9766	2.33333	1.5	Q3	8	Q4	120
108206217001	no	6	0	female	46	Married	High school	rural	Never	no	no	yes	31.6767	2	0	Q2	6	Q1	0
108206227001	no	7	0	male	62	Married	Elementary school and below	rural	Current	no	no	no	22.0585	2.33333	0	Q3	8	Q1	0
108206227002	no	9	20	female	59	Married	Elementary school and below	rural	Never	no	no	no	22.1418	3	0.333333	Q4	9	Q3	60
108206221001	no	8	0	male	53	Married	Elementary school and below	rural	Current	>1m	no	no	23.004	2.66667	0	Q3	8	Q1	0
108206221002	no	6	0	female	58	Married	Elementary school and below	rural	Never	no	yes	no	29.0696	2	0	Q2	6	Q1	0
108206205002	no	6	60	male	49	Married	High school	rural	Current	no	yes	no	26.5166	2	1	Q2	6	Q3	60
108206205001	no	4	0	female	52	Married	Elementary school and below	rural	Current	no	yes	no	24.6074	1.33333	0	Q1	4	Q1	0
108206206002	no	3	0	male	54	Married	Elementary school and below	rural	Never	no	yes	no	25.4185	1	0	Q1	4	Q1	0
108206206001	no	7	0	female	48	Married	Elementary school and below	rural	Never	no	yes	no	30.2733	2.33333	0	Q3	8	Q1	0
108206220002	no	6	60	male	62	Married	High school	rural	Never	no	yes	no	26.2478	2	1	Q2	6	Q3	60
108206210002	no	6	0	male	52	Married	High school	rural	Current	no	yes	no	20.7732	2	0	Q2	6	Q1	0
108206210001	no	5	0	female	51	Married	Elementary school and below	rural	Never	no	yes	yes	31.0387	1.66667	0	Q1	4	Q1	0
108206207001	no	6	0	male	51	Married	High school	rural	Never	>1m	yes	no	21.3635	2	0	Q2	6	Q1	0
108206207002	no	6	0	female	46	Married	Elementary school and below	rural	Never	no	yes	no	26.6173	2	0	Q2	6	Q1	0
108206216002	no	8	0	male	56	Married	Elementary school and below	rural	Current	>1m	yes	no	22.527	2.66667	0	Q3	8	Q1	0
108206216001	no	7	0	female	53	Married	Elementary school and below	rural	Current	no	no	no	19.7713	2.33333	0	Q3	8	Q1	0
108206209002	no	5	120	male	81	Married	High school	rural	Current	no	yes	no	21.1152	1.66667	2	Q1	4	Q4	120
108206209001	no	8	120	female	82	Married	Elementary school and below	rural	Never	no	yes	no	32.1966	2.66667	2	Q3	8	Q4	120
108206102002	no	5	60	male	50	Married	High school	rural	Former	no	yes	yes	33.284	1.66667	1	Q1	4	Q3	60
108206102001	no	8	60	female	47	Married	High school	rural	Never	no	no	no	23.8144	2.66667	1	Q3	8	Q3	60
108206104001	no	6.5	60	male	71	Married	High school	rural	Former	no	yes	yes	46.3668	2.16667	1	Q2	6	Q3	60
108206104002	no	5	0	female	66	Married	High school	rural	Never	no	no	no	44.8545	1.66667	0	Q1	4	Q1	0
108206310001	no	7	60	male	49	Married	High school	rural	Current	>1m	no	no	26.1269	2.33333	1	Q3	8	Q3	60
108206313001	no	5	0	female	63	Non-married	Elementary school and below	rural	Current	no	yes	no	22.4	1.66667	0	Q1	4	Q1	0
108206302002	no	6	15	female	61	Married	Elementary school and below	rural	Never	no	no	no	26.9541	2	0.25	Q2	6	Q3	60
108206312001	no	8	0	male	57	Married	Elementary school and below	rural	Current	no	no	no	21.8934	2.66667	0	Q3	8	Q1	0
108206312002	no	10	60	female	53	Married	Elementary school and below	rural	Never	no	yes	no	28.3256	3.33333	1	Q4	9	Q3	60
108206314002	no	5	60	male	59	Married	High school	rural	Current	>1m	no	no	28.7899	1.66667	1	Q1	4	Q3	60
108206314001	no	9	0	female	59	Married	Elementary school and below	rural	Former	no	yes	yes	18.9039	3	0	Q4	9	Q1	0
108206326002	no	5	60	male	53	Married	High school	rural	Never	no	yes	no	21.0525	1.66667	1	Q1	4	Q3	60
108206326001	no	7	0	female	52	Married	Elementary school and below	rural	Never	no	no	no	23.2411	2.33333	0	Q3	8	Q1	0
108206324001	no	11	0	male	60	Married	Elementary school and below	rural	Current	>1m	no	no	20.3455	3.66667	0	Q4	9	Q1	0
108206305002	no	10	0	male	68	Married	Elementary school and below	rural	Current	no	yes	no	25.4559	3.33333	0	Q4	9	Q1	0
108206305001	no	6	0	female	58	Married	Elementary school and below	rural	Never	no	yes	no	22.6306	2	0	Q2	6	Q1	0
108206321002	no	8	60	male	58	Married	Elementary school and below	rural	Never	no	yes	no	30.4905	2.66667	1	Q3	8	Q3	60
108206321001	no	10	0	female	56	Married	Elementary school and below	rural	Never	no	no	no	23.767	3.33333	0	Q4	9	Q1	0
108206328001	no	6	60	male	54	Married	High school	rural	Never	>1m	no	no	32.2517	2	1	Q2	6	Q3	60
108206328002	no	6	0	female	52	Married	Elementary school and below	rural	Never	no	no	no	29.2507	2	0	Q2	6	Q1	0
108206319001	yes	6	0	male	53	Married	Elementary school and below	rural	Current	no	no	no	23.4876	2	0	Q2	6	Q1	0
108206319002	no	7	180	female	53	Married	Elementary school and below	rural	Current	>1m	no	yes	20.8122	2.33333	3	Q3	8	Q4	120
108206303001	no	7	30	male	67	Non-married	Elementary school and below	rural	Current	no	yes	no	24.555	2.33333	0.5	Q3	8	Q3	60
108206322001	no	7	0	male	46	Married	Elementary school and below	rural	Current	no	no	no	20.2239	2.33333	0	Q3	8	Q1	0
108206317001	no	6	0	male	56	Married	Elementary school and below	rural	Never	<1m	no	no	17.7758	2	0	Q2	6	Q1	0
108206317002	no	7	0	female	56	Married	Elementary school and below	rural	Never	no	no	no	22.1026	2.33333	0	Q3	8	Q1	0
108206307001	no	2	0	male	60	Married	High school	rural	Current	>1m	yes	no	26.7576	0.666667	0	Q1	4	Q1	0
108206307002	no	6	0	female	59	Married	Elementary school and below	rural	Former	no	yes	no	25.5161	2	0	Q2	6	Q1	0
108206329001	no	5	0	female	59	Married	Elementary school and below	rural	Current	no	yes	no	27.1186	1.66667	0	Q1	4	Q1	0
108206308001	no	8	0	female	52	Married	High school	rural	Never	no	yes	no	26.6876	2.66667	0	Q3	8	Q1	0
108206323001	no	7	60	male	46	Married	Elementary school and below	rural	Current	>1m	no	no	22.0123	2.33333	1	Q3	8	Q3	60
108206323002	no	8	0	female	46	Married	Elementary school and below	rural	Never	no	yes	no	23.457	2.66667	0	Q3	8	Q1	0
108206318001	no	7	0	male	55	Married	High school	rural	Former	>1m	yes	no	26.0649	2.33333	0	Q3	8	Q1	0
108206318002	no	8	0	female	56	Married	Elementary school and below	rural	Never	no	yes	no	25.5129	2.66667	0	Q3	8	Q1	0
108206304002	no	8	60	male	63	Married	Elementary school and below	rural	Never	no	yes	yes	25.9787	2.66667	1	Q3	8	Q3	60
108206306002	no	6	60	male	63	Married	Elementary school and below	rural	Never	>1m	yes	no	30.3739	2	1	Q2	6	Q3	60
108206306001	no	6	0	female	61	Married	Elementary school and below	rural	Current	no	yes	no	23.7187	2	0	Q2	6	Q1	0
108206327001	no	5	0	female	68	Non-married	Elementary school and below	rural	Never	no	yes	no	22.5935	1.66667	0	Q1	4	Q1	0
105102313001	no	7	0	male	65	Married	Elementary school and below	urban	Current	>1m	yes	no	22.9929	2.33333	0	Q3	8	Q1	0
105102322001	no	6	1	male	65	Married	High school	urban	Never	no	no	yes	24.0416	2	0.0166667	Q2	6	Q2	1
105102321001	no	6	1	male	57	Married	High school	urban	Current	>1m	yes	no	26.636	2	0.0166667	Q2	6	Q2	1
105102326002	no	7	90	male	47	Married	college and higher	urban	Never	>1m	yes	yes	33.2235	2.33333	1.5	Q3	8	Q4	120
105102327002	no	7	0	female	63	Married	High school	urban	Current	no	yes	no	26.6595	2.33333	0	Q3	8	Q1	0
105102327001	no	8	2	male	64	Married	Elementary school and below	urban	Current	>1m	yes	no	26.0676	2.66667	0.0333333	Q3	8	Q3	60
105102310001	no	6	20	female	45	Married	High school	urban	Never	no	no	no	29.0947	2	0.333333	Q2	6	Q3	60
105102308002	no	7	60	female	79	Married	college and higher	urban	Never	no	yes	yes	27.251	2.33333	1	Q3	8	Q3	60
105102305001	no	7	60	female	60	Non-married	High school	urban	Never	no	yes	yes	27.3909	2.33333	1	Q3	8	Q3	60
105102302002	no	7	70	female	47	Married	college and higher	urban	Never	<1m	yes	yes	24.6137	2.33333	1.16667	Q3	8	Q4	120
105102306001	no	6	3	male	75	Married	High school	urban	Never	no	no	no	21.0243	2	0.05	Q2	6	Q3	60
105102323002	no	2	0	female	55	Married	college and higher	urban	Never	no	no	no	23.118	0.666667	0	Q1	4	Q1	0
105102311001	no	5	60	female	61	Non-married	High school	urban	Current	<1m	no	yes	22.6414	1.66667	1	Q1	4	Q3	60
105102301001	no	6	30	female	62	Married	High school	urban	Never	no	no	no	18.8677	2	0.5	Q2	6	Q3	60
105102107001	no	7	30	male	49	Married	High school	urban	Never	>1m	yes	no	22.4369	2.33333	0.5	Q3	8	Q3	60
105102107002	no	7	90	female	48	Married	High school	urban	Never	no	yes	no	23.0523	2.33333	1.5	Q3	8	Q4	120
105102102002	no	8	120	male	56	Married	High school	urban	Never	>1m	no	no	22.7256	2.66667	2	Q3	8	Q4	120
105102136002	no	7	60	male	57	Married	college and higher	urban	Never	no	yes	no	26.3043	2.33333	1	Q3	8	Q3	60
105102136001	no	7	30	female	60	Married	High school	urban	Current	no	yes	no	18.9027	2.33333	0.5	Q3	8	Q3	60
105102134001	no	7	60	male	62	Married	High school	urban	Current	no	yes	yes	33.2163	2.33333	1	Q3	8	Q3	60
105102134002	no	6	60	female	60	Married	Elementary school and below	urban	Never	no	yes	no	28.3612	2	1	Q2	6	Q3	60
105102130001	no	6	60	female	73	Non-married	Elementary school and below	urban	Never	no	yes	no	21.1702	2	1	Q2	6	Q3	60
105102131001	no	4	0	female	52	Non-married	High school	urban	Never	no	no	no	24.788	1.33333	0	Q1	4	Q1	0
105102109001	no	7	60	male	47	Married	High school	urban	Current	no	no	no	22.5482	2.33333	1	Q3	8	Q3	60
105102109002	no	7	60	female	47	Married	High school	urban	Never	no	no	yes	30.4586	2.33333	1	Q3	8	Q3	60
105102124002	no	7	120	male	55	Married	High school	urban	Current	no	no	no	19.6748	2.33333	2	Q3	8	Q4	120
105102124001	no	7	120	female	54	Married	Elementary school and below	urban	Never	no	no	no	34.9839	2.33333	2	Q3	8	Q4	120
105102122001	no	5	0	female	75	Non-married	Elementary school and below	urban	Never	>1m	no	no	22.1421	1.66667	0	Q1	4	Q1	0
105102111002	no	7	60	male	53	Married	Elementary school and below	urban	Never	>1m	no	no	25.7089	2.33333	1	Q3	8	Q3	60
105102111001	no	6	0	female	53	Married	High school	urban	Never	no	no	no	28.8462	2	0	Q2	6	Q1	0
105102112001	no	8	60	female	73	Non-married	Elementary school and below	urban	Current	no	yes	no	24.7679	2.66667	1	Q3	8	Q3	60
105102129001	no	7	60	male	48	Married	High school	urban	Never	>1m	no	no	25.8806	2.33333	1	Q3	8	Q3	60
105102129002	no	4	0	female	48	Married	High school	urban	Never	no	yes	no	25.3103	1.33333	0	Q1	4	Q1	0
105102115001	no	6	60	male	59	Married	High school	urban	Current	>1m	yes	no	23.0655	2	1	Q2	6	Q3	60
105102115002	no	7	60	female	61	Married	Elementary school and below	urban	Current	no	yes	no	25.9173	2.33333	1	Q3	8	Q3	60
105102116002	no	8	60	male	49	Married	college and higher	urban	Never	no	yes	no	22.6912	2.66667	1	Q3	8	Q3	60
105102116001	no	6	60	female	47	Married	Elementary school and below	urban	Never	no	no	no	26.3702	2	1	Q2	6	Q3	60
105102137002	no	6	90	male	47	Married	Elementary school and below	urban	Current	>1m	no	no	19.0311	2	1.5	Q2	6	Q4	120
105102137001	no	7	0	female	47	Married	High school	urban	Never	no	no	yes	27.1614	2.33333	0	Q3	8	Q1	0
105102118001	yes	7	60	female	52	Married	High school	urban	Current	>1m	yes	no	24.0935	2.33333	1	Q3	8	Q3	60
105102118002	no	6	60	male	52	Married	High school	urban	Current	>1m	no	yes	27.1643	2	1	Q2	6	Q3	60
105102108002	no	5	60	male	50	Married	High school	urban	Never	>1m	yes	no	29.7211	1.66667	1	Q1	4	Q3	60
105102108001	no	5	0	female	51	Married	High school	urban	Never	no	yes	no	29.9264	1.66667	0	Q1	4	Q1	0
105102104001	no	8	30	male	61	Married	High school	urban	Never	no	yes	no	28.5558	2.66667	0.5	Q3	8	Q3	60
105102104002	no	6	60	female	60	Married	Elementary school and below	urban	Never	no	yes	no	28.3563	2	1	Q2	6	Q3	60
105102117001	no	6	60	male	47	Married	High school	urban	Never	>1m	no	no	22.8542	2	1	Q2	6	Q3	60
105102135002	no	9	120	female	55	Married	High school	urban	Never	no	yes	no	26.9287	3	2	Q4	9	Q4	120
105102135001	no	7	60	male	56	Married	High school	urban	Never	no	yes	no	25.8621	2.33333	1	Q3	8	Q3	60
105102127002	no	8	90	female	54	Married	High school	urban	Current	no	yes	no	28.9282	2.66667	1.5	Q3	8	Q4	120
105102119002	no	7	120	male	49	Married	Elementary school and below	urban	Current	>1m	yes	no	20.7625	2.33333	2	Q3	8	Q4	120
105102119001	no	3	60	female	53	Married	Elementary school and below	urban	Current	no	no	no	18.7781	1	1	Q1	4	Q3	60
105102120002	no	8	0	male	57	Married	High school	urban	Never	>1m	yes	no	34.1401	2.66667	0	Q3	8	Q1	0
105102120001	no	8	0	female	58	Married	High school	urban	Never	no	yes	no	18.0469	2.66667	0	Q3	8	Q1	0
105102113002	no	7	120	male	53	Married	High school	urban	Current	no	no	no	20.8415	2.33333	2	Q3	8	Q4	120
105102113001	no	8	120	female	53	Married	Elementary school and below	urban	Current	no	no	no	20.6758	2.66667	2	Q3	8	Q4	120
105102121001	no	7	30	male	53	Married	High school	urban	Current	>1m	no	no	19.5409	2.33333	0.5	Q3	8	Q3	60
105102121002	no	7	60	female	53	Married	High school	urban	Never	no	yes	no	32.4812	2.33333	1	Q3	8	Q3	60
105102106002	no	7	60	male	49	Married	college and higher	urban	Never	>1m	no	yes	26.0318	2.33333	1	Q3	8	Q3	60
105102106001	no	8	60	female	51	Married	High school	urban	Never	no	no	no	27.4657	2.66667	1	Q3	8	Q3	60
105102101001	no	8	120	male	57	Married	Elementary school and below	urban	Never	>1m	yes	no	27.9195	2.66667	2	Q3	8	Q4	120
105102101002	no	8	120	female	57	Married	Elementary school and below	urban	Current	>1m	yes	no	20.6255	2.66667	2	Q3	8	Q4	120
105102133001	no	6	30	female	52	Non-married	Elementary school and below	urban	Current	no	no	no	16.6335	2	0.5	Q2	6	Q3	60
105102132001	yes	7	120	female	69	Non-married	Elementary school and below	urban	Current	no	yes	no	18	2.33333	2	Q3	8	Q4	120
105102105001	no	7	30	male	47	Married	college and higher	urban	Never	>1m	no	no	23.8981	2.33333	0.5	Q3	8	Q3	60
105102105002	no	8	0	female	48	Married	High school	urban	Never	no	yes	no	32.6871	2.66667	0	Q3	8	Q1	0
105102222001	no	7	60	female	55	Married	High school	urban	Never	no	no	yes	21.7738	2.33333	1	Q3	8	Q3	60
105102210002	no	6	30	male	70	Married	Elementary school and below	urban	Never	>1m	no	yes	23.8304	2	0.5	Q2	6	Q3	60
105102210001	no	6	60	female	67	Married	Elementary school and below	urban	Never	no	yes	no	30.0433	2	1	Q2	6	Q3	60
105102232002	no	6	0	male	58	Married	High school	urban	Current	>1m	yes	no	25.0449	2	0	Q2	6	Q1	0
105102232001	no	7	40	female	56	Married	High school	urban	Current	no	yes	no	26.8358	2.33333	0.666667	Q3	8	Q3	60
105102201002	no	3	0	female	48	Married	High school	urban	Never	no	no	no	27.4235	1	0	Q1	4	Q1	0
105102218001	no	5	0	female	53	Married	Elementary school and below	urban	Never	no	yes	yes	26.6406	1.66667	0	Q1	4	Q1	0
105102218002	no	3	0	male	57	Married	Elementary school and below	urban	Never	>1m	no	no	23.0546	1	0	Q1	4	Q1	0
105102224001	no	7	60	male	71	Married	High school	urban	Never	>1m	yes	no	28.0277	2.33333	1	Q3	8	Q3	60
105102224002	no	7	90	female	63	Married	High school	urban	Never	no	no	no	20.0663	2.33333	1.5	Q3	8	Q4	120
105102240002	no	8	0	male	50	Married	High school	urban	Never	>1m	no	no	23.9567	2.66667	0	Q3	8	Q1	0
105102240001	no	7	60	female	49	Married	High school	urban	Current	no	yes	no	21.1011	2.33333	1	Q3	8	Q3	60
105102212001	no	7	60	female	52	Married	High school	urban	Never	no	yes	no	26.6137	2.33333	1	Q3	8	Q3	60
105102237002	no	5	0	female	46	Married	High school	urban	Never	no	no	no	26.5325	1.66667	0	Q1	4	Q1	0
105102226002	no	7	0	male	61	Married	High school	urban	Never	>1m	yes	no	26.6728	2.33333	0	Q3	8	Q1	0
105102226001	no	3	10	female	59	Married	Elementary school and below	urban	Never	no	yes	yes	25.8054	1	0.166667	Q1	4	Q3	60
105102225001	no	6	120	male	48	Married	Elementary school and below	urban	Current	>1m	no	no	23.4179	2	2	Q2	6	Q4	120
105102235001	no	8	60	male	60	Married	Elementary school and below	urban	Never	no	yes	no	32.41	2.66667	1	Q3	8	Q3	60
105102235002	no	8	60	female	52	Married	Elementary school and below	urban	Never	no	yes	no	29.3087	2.66667	1	Q3	8	Q3	60
105102206001	no	7	60	female	67	Non-married	Elementary school and below	urban	Current	no	yes	no	18.7637	2.33333	1	Q3	8	Q3	60
105102202001	no	7	60	male	51	Married	Elementary school and below	urban	Never	>1m	no	no	25.5409	2.33333	1	Q3	8	Q3	60
105102202002	no	7	60	female	51	Married	High school	urban	Never	>1m	yes	no	23.0861	2.33333	1	Q3	8	Q3	60
105102236001	no	5	30	female	49	Married	High school	urban	Never	no	yes	no	23.4221	1.66667	0.5	Q1	4	Q3	60
105102208001	no	6	60	female	51	Married	High school	urban	Current	no	no	no	19.8757	2	1	Q2	6	Q3	60
105102234002	no	7	0	female	52	Married	Elementary school and below	urban	Never	no	yes	no	24.275	2.33333	0	Q3	8	Q1	0
105102234001	no	8	60	male	68	Married	college and higher	urban	Never	no	yes	yes	26.2227	2.66667	1	Q3	8	Q3	60
105102219001	no	7	60	female	64	Non-married	High school	urban	Never	no	yes	no	25.6312	2.33333	1	Q3	8	Q3	60
105102220002	no	7	120	male	59	Married	Elementary school and below	urban	Current	>1m	yes	yes	24.8712	2.33333	2	Q3	8	Q4	120
105102220001	no	6	20	female	61	Married	High school	urban	Never	no	no	no	22.2656	2	0.333333	Q2	6	Q3	60
105102207002	no	8	60	male	53	Married	High school	urban	Never	no	no	no	16.901	2.66667	1	Q3	8	Q3	60
105102207001	yes	7	0	female	49	Married	High school	urban	Never	no	yes	no	25.2363	2.33333	0	Q3	8	Q1	0
105102217001	no	6	60	female	72	Married	Elementary school and below	urban	Never	no	yes	no	31.3563	2	1	Q2	6	Q3	60
105102233002	no	6	30	female	65	Married	college and higher	urban	Never	no	no	no	21.8195	2	0.5	Q2	6	Q3	60
105102233001	no	6	60	male	68	Married	High school	urban	Never	>1m	yes	yes	30.5536	2	1	Q2	6	Q3	60
105102230001	no	3	5	female	46	Married	Elementary school and below	urban	Never	no	no	no	21.3207	1	0.0833333	Q1	4	Q3	60
105102214002	no	8	60	male	76	Married	Elementary school and below	urban	Never	no	yes	no	22.8329	2.66667	1	Q3	8	Q3	60
105102231001	no	5	120	male	49	Married	High school	urban	Current	>1m	no	no	28.7889	1.66667	2	Q1	4	Q4	120
105102231002	no	7	0	female	47	Married	Elementary school and below	urban	Never	no	yes	no	31.7349	2.33333	0	Q3	8	Q1	0
105102215002	no	7	0	male	51	Married	High school	urban	Current	<1m	no	no	25.2976	2.33333	0	Q3	8	Q1	0
105102215001	no	6	0	female	49	Married	Elementary school and below	urban	Never	no	yes	no	23.9866	2	0	Q2	6	Q1	0
105102216001	no	7	60	male	61	Married	High school	urban	Former	no	no	no	23.3535	2.33333	1	Q3	8	Q3	60
105102216002	yes	7	60	female	60	Married	High school	urban	Former	no	no	no	20.4695	2.33333	1	Q3	8	Q3	60
105102204001	no	6	0	male	66	Non-married	Elementary school and below	urban	Current	>1m	no	no	21.5288	2	0	Q2	6	Q1	0
105102221001	no	7	60	male	57	Married	High school	urban	Never	>1m	yes	no	20.014	2.33333	1	Q3	8	Q3	60
105102221002	no	8	60	female	57	Married	High school	urban	Current	<1m	yes	yes	24.9364	2.66667	1	Q3	8	Q3	60
105102203001	no	7	60	male	45	Married	High school	urban	Current	>1m	yes	no	17.2263	2.33333	1	Q3	8	Q3	60
105102203002	no	5	60	female	45	Married	Elementary school and below	urban	Never	no	yes	no	31.4102	1.66667	1	Q1	4	Q3	60
105102229002	no	8	60	male	49	Married	High school	urban	Never	>1m	no	no	18.2509	2.66667	1	Q3	8	Q3	60
105102229001	yes	7	60	female	47	Married	High school	urban	Never	no	yes	no	22.7615	2.33333	1	Q3	8	Q3	60
105102205001	no	7	60	male	48	divorced	High school	urban	Never	>1m	yes	no	26.0096	2.33333	1	Q3	8	Q3	60
105102239002	no	5	0	male	57	Married	Elementary school and below	urban	Current	no	yes	no	24.4995	1.66667	0	Q1	4	Q1	0
105102239001	no	6	0	female	57	Married	Elementary school and below	urban	Never	no	no	no	23.7542	2	0	Q2	6	Q1	0
105102209001	no	8	0	male	47	Married	High school	urban	Current	>1m	yes	no	23.1049	2.66667	0	Q3	8	Q1	0
105102209002	no	7	0	female	47	Married	High school	urban	Never	no	no	yes	30.7125	2.33333	0	Q3	8	Q1	0
105102213001	no	7	120	female	60	Married	Elementary school and below	urban	Never	no	yes	no	26.5222	2.33333	2	Q3	8	Q4	120
101791304001	no	8	0	male	61	Married	Elementary school and below	rural	Current	>1m	yes	no	29.8328	2.66667	0	Q3	8	Q1	0
101791304002	no	6	0	female	56	Married	Elementary school and below	rural	Never	no	yes	no	24.8195	2	0	Q2	6	Q1	0
101791305002	no	8	0	male	48	Married	Elementary school and below	rural	Former	>1m	yes	no	32.0722	2.66667	0	Q3	8	Q1	0
101791315001	no	6	0	female	85	Non-married	Elementary school and below	rural	Current	no	yes	no	29.9875	2	0	Q2	6	Q1	0
101791312002	no	7	0	male	57	Married	Elementary school and below	rural	Former	>1m	no	no	21.3967	2.33333	0	Q3	8	Q1	0
101791318001	no	8	0	male	45	Married	High school	rural	Former	>1m	no	no	20.9407	2.66667	0	Q3	8	Q1	0
101791309001	no	8	30	female	58	Non-married	Elementary school and below	rural	Former	no	yes	no	22.5755	2.66667	0.5	Q3	8	Q3	60
101791317001	no	8	0	female	47	Married	High school	rural	Never	no	no	no	23.5887	2.66667	0	Q3	8	Q1	0
101791316002	no	8	0	male	52	Married	Elementary school and below	rural	Current	>1m	yes	no	20.9196	2.66667	0	Q3	8	Q1	0
101791316001	no	4	0	female	49	Married	High school	rural	Never	no	yes	no	29.7033	1.33333	0	Q1	4	Q1	0
101791306001	no	7	0	female	50	Non-married	High school	rural	Never	>1m	no	no	22.4153	2.33333	0	Q3	8	Q1	0
101791301001	no	9	0	female	57	Married	Elementary school and below	rural	Former	>1m	no	no	26.3324	3	0	Q4	9	Q1	0
101791320002	no	6	0	female	59	Married	Elementary school and below	rural	Never	>1m	yes	no	20.5235	2	0	Q2	6	Q1	0
101791320001	no	7	0	male	64	Married	Elementary school and below	rural	Former	>1m	yes	no	23.7024	2.33333	0	Q3	8	Q1	0
101791314001	no	9	60	female	54	Married	Elementary school and below	rural	Former	no	yes	no	22.4609	3	1	Q4	9	Q3	60
101791310001	no	8	0	female	60	Non-married	Elementary school and below	rural	Never	no	yes	no	24.0692	2.66667	0	Q3	8	Q1	0
101791313001	no	7	0	male	51	Married	Elementary school and below	rural	Former	no	yes	no	31.3537	2.33333	0	Q3	8	Q1	0
101791313002	no	8	0	female	49	Married	High school	rural	Never	no	yes	no	33.0189	2.66667	0	Q3	8	Q1	0
101791307002	no	7	0	male	52	Married	Elementary school and below	rural	Current	>1m	yes	no	24.0144	2.33333	0	Q3	8	Q1	0
101791308001	no	4	0	male	53	Married	Elementary school and below	rural	Former	>1m	yes	no	22.0363	1.33333	0	Q1	4	Q1	0
101791308002	no	7	0	female	49	Married	High school	rural	Never	>1m	yes	no	24.1259	2.33333	0	Q3	8	Q1	0
101791208001	no	9	60	female	85	Non-married	Elementary school and below	urban	Never	no	no	no	18.4976	3	1	Q4	9	Q3	60
101791213001	no	7	30	male	47	Married	High school	urban	Never	no	yes	no	28.7032	2.33333	0.5	Q3	8	Q3	60
101791213002	no	8	30	female	48	Married	High school	urban	Never	no	no	no	24.2415	2.66667	0.5	Q3	8	Q3	60
101791221001	no	8	30	female	65	Married	High school	urban	Former	>1m	yes	no	29.7442	2.66667	0.5	Q3	8	Q3	60
101791116001	no	8	0	male	49	Married	High school	rural	Never	no	yes	no	24.9024	2.66667	0	Q3	8	Q1	0
101791116002	no	8	0	female	50	Married	Elementary school and below	rural	Never	<1m	no	no	30.4197	2.66667	0	Q3	8	Q1	0
101791115002	no	7	0	male	64	Married	High school	rural	Current	no	yes	no	20.8155	2.33333	0	Q3	8	Q1	0
101791115001	no	8	0	female	60	Married	Elementary school and below	rural	Current	no	yes	no	19.4085	2.66667	0	Q3	8	Q1	0
101791119002	no	8	0	male	51	Married	High school	rural	Never	>1m	no	no	24.8786	2.66667	0	Q3	8	Q1	0
101791111002	no	7	0	female	53	Married	Elementary school and below	rural	Never	no	no	no	29.216	2.33333	0	Q3	8	Q1	0
101791112001	no	5	0	female	49	Non-married	Elementary school and below	rural	Never	no	no	no	26.6188	1.66667	0	Q1	4	Q1	0
101791113001	no	8	100	male	69	Non-married	Elementary school and below	rural	Current	no	yes	no	35.3767	2.66667	1.66667	Q3	8	Q4	120
101791109001	no	6	60	male	58	Married	Elementary school and below	rural	Current	>1m	no	yes	19.113	2	1	Q2	6	Q3	60
101791109002	no	6	0	female	55	Married	Elementary school and below	rural	Never	no	no	no	29.1608	2	0	Q2	6	Q1	0
101791114002	no	8	0	male	49	Married	High school	rural	Former	>1m	yes	no	28.4874	2.66667	0	Q3	8	Q1	0
101791114001	no	4	0	female	46	Married	Elementary school and below	rural	Never	no	no	no	27.4315	1.33333	0	Q1	4	Q1	0
101791104001	no	8	60	male	53	Married	Elementary school and below	rural	Current	>1m	yes	no	30.2121	2.66667	1	Q3	8	Q3	60
101791104002	no	6	0	female	52	Married	Elementary school and below	rural	Never	no	yes	no	25.5183	2	0	Q2	6	Q1	0
101791120002	no	7	0	male	65	Married	Elementary school and below	rural	Never	no	yes	no	24.0108	2.33333	0	Q3	8	Q1	0
101791120001	no	4	0	female	57	Married	Elementary school and below	rural	Never	no	no	no	22.3101	1.33333	0	Q1	4	Q1	0
101791118002	no	8	0	male	53	Married	High school	rural	Never	no	no	no	23.725	2.66667	0	Q3	8	Q1	0
101791106001	no	7	0	female	56	Non-married	Elementary school and below	rural	Never	no	yes	no	32.4067	2.33333	0	Q3	8	Q1	0
101791105002	no	8	0	male	51	Married	Elementary school and below	rural	Never	>1m	yes	no	24.3531	2.66667	0	Q3	8	Q1	0
101791105001	no	7	0	female	47	Married	Elementary school and below	rural	Never	no	yes	no	31.3555	2.33333	0	Q3	8	Q1	0
101791102002	no	9	0	male	54	Married	Elementary school and below	rural	Current	>1m	yes	no	22.2431	3	0	Q4	9	Q1	0
101791108002	no	8	0	male	61	Married	Elementary school and below	rural	Current	no	yes	no	21.7845	2.66667	0	Q3	8	Q1	0
101791108001	no	8	0	female	57	Married	Elementary school and below	rural	Never	no	no	no	25.73	2.66667	0	Q3	8	Q1	0
162431214001	no	7	0	male	56	Married	High school	rural	Current	>1m	no	no	20.5688	2.33333	0	Q3	8	Q1	0
162431214002	no	8	60	female	56	Married	Elementary school and below	rural	Never	no	no	no	22.8927	2.66667	1	Q3	8	Q3	60
162431226002	no	8	120	male	56	Married	Elementary school and below	rural	Current	no	no	no	22.7155	2.66667	2	Q3	8	Q4	120
162431226001	no	4	0	female	56	Married	Elementary school and below	rural	Never	no	no	no	17.3124	1.33333	0	Q1	4	Q1	0
162431215002	no	7	120	female	79	Married	Elementary school and below	rural	Never	no	yes	no	23.3466	2.33333	2	Q3	8	Q4	120
162431212002	no	7	60	male	55	Married	Elementary school and below	rural	Current	<1m	no	no	23.8585	2.33333	1	Q3	8	Q3	60
162431212001	no	12	120	female	54	Married	Elementary school and below	rural	Never	no	no	no	27.8795	4	2	Q4	9	Q4	120
162431204001	no	7	30	male	57	Married	High school	rural	Current	>1m	yes	no	22.6822	2.33333	0.5	Q3	8	Q3	60
162431204002	no	7	0	female	57	Married	Elementary school and below	rural	Never	no	no	no	25	2.33333	0	Q3	8	Q1	0
162431218001	no	8	120	female	68	Married	Elementary school and below	rural	Never	no	no	no	27.029	2.66667	2	Q3	8	Q4	120
162431218002	no	6	30	male	64	Married	Elementary school and below	rural	Current	>1m	yes	no	20.4825	2	0.5	Q2	6	Q3	60
162431205001	no	5	60	female	52	Married	Elementary school and below	rural	Never	<1m	no	no	22.6145	1.66667	1	Q1	4	Q3	60
162431205002	no	6	60	male	55	Married	Elementary school and below	rural	Never	no	yes	no	25.7812	2	1	Q2	6	Q3	60
162431222001	no	8	60	female	55	Married	High school	rural	Never	no	no	no	27.2271	2.66667	1	Q3	8	Q3	60
162431209002	no	6	60	male	64	Married	Elementary school and below	rural	Current	>1m	yes	no	20.3424	2	1	Q2	6	Q3	60
162431209001	no	6	30	female	64	Married	Elementary school and below	rural	Never	no	no	no	26.6298	2	0.5	Q2	6	Q3	60
162431210001	no	5	60	female	63	Married	Elementary school and below	rural	Never	no	no	yes	27.0312	1.66667	1	Q1	4	Q3	60
162431210002	no	7	120	male	63	Married	Elementary school and below	rural	Current	>1m	yes	no	26.5641	2.33333	2	Q3	8	Q4	120
162431221002	no	8	60	male	72	Married	Elementary school and below	rural	Current	no	yes	no	24.0778	2.66667	1	Q3	8	Q3	60
162431221001	no	7	120	female	75	Married	Elementary school and below	rural	Never	no	no	no	17.7912	2.33333	2	Q3	8	Q4	120
162431216002	no	6	0	male	54	Married	Elementary school and below	rural	Never	<1m	yes	no	22.5368	2	0	Q2	6	Q1	0
162431216001	no	6	30	female	49	Married	Elementary school and below	rural	Current	no	no	no	25.8448	2	0.5	Q2	6	Q3	60
162431203002	no	5	60	female	73	Married	Elementary school and below	rural	Never	no	no	yes	23.7748	1.66667	1	Q1	4	Q3	60
162431203001	no	5	0	male	73	Married	Elementary school and below	rural	Current	>1m	no	no	22.1958	1.66667	0	Q1	4	Q1	0
162431220001	no	5	0	female	49	Married	High school	rural	Never	no	no	no	27.2679	1.66667	0	Q1	4	Q1	0
162431228002	no	6.5	60	male	61	Married	High school	rural	Never	no	yes	no	22.3297	2.16667	1	Q2	6	Q3	60
162431228001	no	7	0	female	63	Married	Elementary school and below	rural	Never	no	no	no	27.1534	2.33333	0	Q3	8	Q1	0
162431211001	no	6	0	female	54	Married	Elementary school and below	rural	Never	no	yes	no	22.4567	2	0	Q2	6	Q1	0
162431211002	no	5	0	male	56	Married	Elementary school and below	rural	Former	>1m	yes	no	23.5913	1.66667	0	Q1	4	Q1	0
162431206001	no	7	60	male	49	Married	Elementary school and below	rural	Current	>1m	no	no	23.4481	2.33333	1	Q3	8	Q3	60
162431224001	no	6	0	male	70	Married	Elementary school and below	rural	Current	>1m	no	yes	23.254	2	0	Q2	6	Q1	0
162431224002	no	6	60	female	70	Married	Elementary school and below	rural	Never	no	no	no	20.8097	2	1	Q2	6	Q3	60
162431201002	no	4	60	male	60	Married	Elementary school and below	rural	Current	>1m	yes	no	18.2748	1.33333	1	Q1	4	Q3	60
162431201001	no	10	120	female	61	Married	Elementary school and below	rural	Never	no	yes	no	29.3473	3.33333	2	Q4	9	Q4	120
162431217001	no	6	0	female	70	Non-married	Elementary school and below	rural	Never	no	no	no	20.1632	2	0	Q2	6	Q1	0
162431227002	no	7	0	female	73	Married	Elementary school and below	rural	Never	no	no	no	21.3675	2.33333	0	Q3	8	Q1	0
162431227001	no	7	120	male	70	Married	Elementary school and below	rural	Never	>1m	yes	no	31.6612	2.33333	2	Q3	8	Q4	120
162431223002	no	6	0	male	51	Married	High school	rural	Current	>1m	no	no	22.5347	2	0	Q2	6	Q1	0
162431223001	no	8	0	female	51	Married	Elementary school and below	rural	Never	no	no	no	22.8657	2.66667	0	Q3	8	Q1	0
162431213001	no	6	120	female	63	Non-married	Elementary school and below	rural	Never	no	no	no	24.9654	2	2	Q2	6	Q4	120
162431219001	no	5	60	male	69	Married	Elementary school and below	rural	Current	>1m	yes	yes	21.2095	1.66667	1	Q1	4	Q3	60
162431219002	no	7	0	female	62	Married	Elementary school and below	rural	Never	no	no	no	22.4128	2.33333	0	Q3	8	Q1	0
161159306001	no	5	60	male	70	Married	Elementary school and below	urban	Current	no	yes	no	26.5949	1.66667	1	Q1	4	Q3	60
161159304001	no	5	0	female	62	Non-married	High school	urban	Never	no	no	no	24.5557	1.66667	0	Q1	4	Q1	0
161159303002	no	8	120	male	60	Married	High school	urban	Former	no	yes	yes	27.1066	2.66667	2	Q3	8	Q4	120
161159303001	no	8	30	female	63	Married	High school	urban	Never	no	yes	yes	30.7095	2.66667	0.5	Q3	8	Q3	60
161159221001	no	8	0	male	53	Married	High school	rural	Current	>1m	yes	no	21.1201	2.66667	0	Q3	8	Q1	0
161159221002	no	7	10	female	51	Married	Elementary school and below	rural	Never	no	no	no	27.1325	2.33333	0.166667	Q3	8	Q3	60
161159225002	no	8	60	male	59	Married	Elementary school and below	rural	Current	>1m	no	yes	24.0588	2.66667	1	Q3	8	Q3	60
161159225001	no	8	60	female	56	Married	Elementary school and below	rural	Current	no	no	no	27.7385	2.66667	1	Q3	8	Q3	60
161159216001	no	3	0	female	65	Married	Elementary school and below	rural	Current	no	yes	no	21.7156	1	0	Q1	4	Q1	0
161159212001	no	5	0	female	71	Married	High school	rural	Never	no	yes	no	20.4783	1.66667	0	Q1	4	Q1	0
161159218002	no	8	30	female	66	Married	Elementary school and below	rural	Current	>1m	no	no	16.9125	2.66667	0.5	Q3	8	Q3	60
161159210001	no	4	60	female	46	Married	Elementary school and below	rural	Never	no	yes	no	23.8915	1.33333	1	Q1	4	Q3	60
161159223001	no	7	0	female	48	Non-married	High school	rural	Current	no	yes	no	22.7879	2.33333	0	Q3	8	Q1	0
161159224002	no	4	60	male	54	Married	High school	rural	Current	no	no	no	25.0214	1.33333	1	Q1	4	Q3	60
161159224001	no	6	0	female	54	Married	Elementary school and below	rural	Current	no	yes	no	28.5996	2	0	Q2	6	Q1	0
161159205002	no	6	30	male	52	Married	Elementary school and below	rural	Never	<1m	yes	no	29.7083	2	0.5	Q2	6	Q3	60
161159205001	no	6	0	female	47	Married	Elementary school and below	rural	Never	no	no	no	29.6247	2	0	Q2	6	Q1	0
161159201002	no	8	10	male	57	Married	High school	rural	Former	>1m	no	no	25.7774	2.66667	0.166667	Q3	8	Q3	60
161159201001	no	5	0	female	56	Married	Elementary school and below	rural	Former	>1m	yes	no	23.191	1.66667	0	Q1	4	Q1	0
161159214001	no	8	120	male	65	Married	High school	rural	Current	>1m	no	no	21.9046	2.66667	2	Q3	8	Q4	120
161159214002	no	5	120	female	63	Married	Elementary school and below	rural	Current	>1m	yes	no	24.6205	1.66667	2	Q1	4	Q4	120
161159206002	no	6	60	female	72	Married	Elementary school and below	rural	Never	no	yes	no	20.259	2	1	Q2	6	Q3	60
161159207001	no	6	60	female	55	Married	High school	rural	Never	no	no	no	26.5873	2	1	Q2	6	Q3	60
161159203002	no	7	120	male	69	Married	High school	rural	Current	>1m	no	yes	17.7165	2.33333	2	Q3	8	Q4	120
161159203001	no	5	120	female	65	Married	High school	rural	Never	no	no	no	18.3604	1.66667	2	Q1	4	Q4	120
161159202002	no	8	30	female	73	Married	Elementary school and below	rural	Never	no	no	no	16.79	2.66667	0.5	Q3	8	Q3	60
161159220002	no	6	30	female	66	Married	High school	rural	Former	no	no	yes	27.1197	2	0.5	Q2	6	Q3	60
161159215001	no	7	0	male	51	Married	High school	rural	Current	>1m	no	no	20.5658	2.33333	0	Q3	8	Q1	0
161159215002	no	8	0	female	51	Married	High school	rural	Never	no	no	no	30.3043	2.66667	0	Q3	8	Q1	0
161159211001	no	7	0	male	46	Married	High school	rural	Current	>1m	no	no	21.3407	2.33333	0	Q3	8	Q1	0
161159213001	no	7	30	male	68	Non-married	Elementary school and below	rural	Current	>1m	no	yes	23.2978	2.33333	0.5	Q3	8	Q3	60
161159209001	no	6	0	female	54	Married	High school	rural	Never	no	no	no	18.3177	2	0	Q2	6	Q1	0
161159208002	no	5	0	female	48	Married	Elementary school and below	rural	Never	no	no	no	23.5409	1.66667	0	Q1	4	Q1	0
161159204002	no	8	60	male	68	Married	Elementary school and below	rural	Never	>1m	yes	no	19.3315	2.66667	1	Q3	8	Q3	60
161159204001	no	5	0	female	65	Married	Elementary school and below	rural	Never	no	no	no	24.1472	1.66667	0	Q1	4	Q1	0
161159222001	no	4	0	female	49	Married	Elementary school and below	rural	Never	no	no	no	20.6767	1.33333	0	Q1	4	Q1	0
161159101002	no	7	30	male	48	Married	High school	rural	Current	>1m	no	no	22.7569	2.33333	0.5	Q3	8	Q3	60
161159116001	no	8	30	male	51	Married	High school	rural	Never	>1m	no	no	25.5166	2.66667	0.5	Q3	8	Q3	60
161159116002	no	6	60	female	48	Married	Elementary school and below	rural	Never	no	no	no	22.354	2	1	Q2	6	Q3	60
161159105001	no	6	0	female	56	Married	High school	rural	Current	no	no	no	22.0474	2	0	Q2	6	Q1	0
161159120001	no	5	60	male	62	Non-married	High school	rural	Current	>1m	no	no	25.9573	1.66667	1	Q1	4	Q3	60
161159115001	no	8	120	male	72	Non-married	Elementary school and below	rural	Current	>1m	no	no	24.3925	2.66667	2	Q3	8	Q4	120
161159114001	no	7	30	female	78	Married	Elementary school and below	rural	Never	no	no	no	16.6665	2.33333	0.5	Q3	8	Q3	60
161159111001	no	7	0	female	74	Non-married	Elementary school and below	rural	Current	no	no	no	23.5796	2.33333	0	Q3	8	Q1	0
161159121001	no	7	20	male	59	Married	High school	rural	Former	>1m	yes	yes	25.213	2.33333	0.333333	Q3	8	Q3	60
161159121002	no	5	0	female	61	Married	Elementary school and below	rural	Never	no	no	no	16.8718	1.66667	0	Q1	4	Q1	0
161159113002	no	8	0	male	51	Married	Elementary school and below	rural	Never	>1m	no	yes	24.3484	2.66667	0	Q3	8	Q1	0
161159113001	no	8	60	female	51	Married	Elementary school and below	rural	Never	no	no	yes	20.9883	2.66667	1	Q3	8	Q3	60
161159119001	no	7	30	male	54	divorced	High school	rural	Current	>1m	no	yes	21.0915	2.33333	0.5	Q3	8	Q3	60
161159103001	no	7	30	male	59	Married	Elementary school and below	rural	Never	>1m	no	no	20.0157	2.33333	0.5	Q3	8	Q3	60
161159103002	no	5	0	female	58	Married	Elementary school and below	rural	Former	no	yes	no	32.8832	1.66667	0	Q1	4	Q1	0
161159107001	no	6	60	male	49	Married	High school	rural	Never	no	no	no	20.5261	2	1	Q2	6	Q3	60
161159107002	no	6	30	female	49	Married	Elementary school and below	rural	Never	no	yes	no	20.5992	2	0.5	Q2	6	Q3	60
161159112002	no	2	0	male	47	Married	Elementary school and below	rural	Current	>1m	no	no	23.4703	0.666667	0	Q1	4	Q1	0
161159104002	no	3	60	male	66	Married	Elementary school and below	rural	Current	no	no	no	20.1739	1	1	Q1	4	Q3	60
161159104001	no	5	0	female	62	Married	Elementary school and below	rural	Current	no	yes	yes	25.5137	1.66667	0	Q1	4	Q1	0
161159108002	no	7	90	male	47	Married	Elementary school and below	rural	Current	<1m	no	no	19.5415	2.33333	1.5	Q3	8	Q4	120
161159108001	no	8	0	female	45	Married	Elementary school and below	rural	Never	no	no	no	21.4361	2.66667	0	Q3	8	Q1	0
161159110002	no	3	0	male	64	Married	Elementary school and below	rural	Current	>1m	no	no	21.1977	1	0	Q1	4	Q1	0
161159110001	no	8	0	female	60	Married	Elementary school and below	rural	Current	no	no	no	18.5086	2.66667	0	Q3	8	Q1	0
161159118001	no	6	60	male	53	Married	High school	rural	Never	<1m	no	no	28.7686	2	1	Q2	6	Q3	60
161159118002	no	5	0	female	52	Married	Elementary school and below	rural	Never	no	no	no	25.36	1.66667	0	Q1	4	Q1	0
161159124001	no	9	60	male	47	Married	High school	rural	Current	no	no	no	23.227	3	1	Q4	9	Q3	60
161159124002	no	8	10	female	48	Married	High school	rural	Never	no	yes	no	24.4175	2.66667	0.166667	Q3	8	Q3	60
161159102002	no	8	50	male	55	Married	High school	rural	Current	no	yes	no	27.438	2.66667	0.833333	Q3	8	Q3	60
161159102001	no	8	60	female	48	Married	Elementary school and below	rural	Never	no	yes	no	25.9062	2.66667	1	Q3	8	Q3	60
161159106002	no	7	50	male	47	Married	High school	rural	Never	no	yes	no	27.3462	2.33333	0.833333	Q3	8	Q3	60
161159106001	no	7	60	female	49	Married	Elementary school and below	rural	Current	no	yes	no	21.6311	2.33333	1	Q3	8	Q3	60
160104302001	no	7	0	female	53	Married	High school	urban	Never	no	no	no	23.3772	2.33333	0	Q3	8	Q1	0
160104301001	no	7	0	female	60	Married	High school	urban	Never	no	yes	no	24.9333	2.33333	0	Q3	8	Q1	0
160104308001	no	5	0	male	64	Married	High school	urban	Never	>1m	no	no	20.8497	1.66667	0	Q1	4	Q1	0
160104308002	no	4	0	female	61	Married	Elementary school and below	urban	Never	no	yes	no	24.2792	1.33333	0	Q1	4	Q1	0
160104307001	no	8	0	male	47	Married	High school	urban	Current	no	no	no	24.8982	2.66667	0	Q3	8	Q1	0
160104307002	no	7	0	male	47	Married	High school	urban	Never	no	no	no	24.1203	2.33333	0	Q3	8	Q1	0
160104110001	no	5	0	female	75	Non-married	Elementary school and below	urban	Never	no	no	no	24.0665	1.66667	0	Q1	4	Q1	0
160104111001	no	6	0	female	67	Non-married	High school	urban	Never	no	no	yes	35.2753	2	0	Q2	6	Q1	0
160104117001	no	8	120	female	57	Married	High school	urban	Never	no	no	no	23.0469	2.66667	2	Q3	8	Q4	120
160104104002	no	8	0	female	62	Married	High school	urban	Never	no	no	no	27.0552	2.66667	0	Q3	8	Q1	0
160104114001	no	7	0	male	80	Non-married	High school	urban	Current	no	no	no	22.0317	2.33333	0	Q3	8	Q1	0
160104120001	no	6	0	female	54	Married	High school	urban	Never	no	no	no	21.0266	2	0	Q2	6	Q1	0
160104127001	no	5	30	female	49	divorced	High school	urban	Never	no	yes	no	29.2446	1.66667	0.5	Q1	4	Q3	60
160104121001	no	7	0	female	59	Married	High school	urban	Never	no	no	no	26.5839	2.33333	0	Q3	8	Q1	0
160104128001	no	5	0	male	51	Married	High school	urban	Current	>1m	yes	no	22.8245	1.66667	0	Q1	4	Q1	0
160104107002	no	6	0	female	59	Married	High school	urban	Never	no	yes	no	37.0447	2	0	Q2	6	Q1	0
160104101002	no	8	0	male	74	Married	college and higher	urban	Never	<1m	no	no	21.4187	2.66667	0	Q3	8	Q1	0
160104122001	no	6	0	female	49	divorced	High school	urban	Never	<1m	no	no	24.996	2	0	Q2	6	Q1	0
160104112002	no	6	0	male	58	Married	Elementary school and below	urban	Never	no	yes	no	22.4	2	0	Q2	6	Q1	0
160104129001	no	4	0	female	55	Married	High school	urban	Never	no	no	no	27.2704	1.33333	0	Q1	4	Q1	0
160104129002	no	6	0	male	58	Married	High school	urban	Never	>1m	no	no	23.5134	2	0	Q2	6	Q1	0
160104125001	no	8	0	female	55	Non-married	High school	urban	Never	no	yes	yes	30.9589	2.66667	0	Q3	8	Q1	0
160104126001	no	10	60	male	74	Non-married	college and higher	urban	Never	no	yes	yes	23.8895	3.33333	1	Q4	9	Q3	60
160104132002	no	5	0	female	58	Married	High school	urban	Never	no	no	no	22.6836	1.66667	0	Q1	4	Q1	0
160104103002	no	6	0	female	56	Married	High school	urban	Never	no	no	no	22.8096	2	0	Q2	6	Q1	0
160104228001	no	3	0	male	61	Married	High school	urban	Current	no	no	no	18.2352	1	0	Q1	4	Q1	0
160104208001	no	5	0	female	63	Non-married	Elementary school and below	urban	Never	no	no	yes	31.1437	1.66667	0	Q1	4	Q1	0
160104225001	no	8	0	female	46	divorced	High school	urban	Never	no	no	no	21.0305	2.66667	0	Q3	8	Q1	0
160104216001	no	7	0	female	73	Non-married	High school	urban	Current	no	no	no	25.4813	2.33333	0	Q3	8	Q1	0
160104224002	no	6	120	male	47	Married	High school	urban	Current	no	no	no	20.7476	2	2	Q2	6	Q4	120
160104222001	no	5	30	female	63	Non-married	Elementary school and below	urban	Never	no	no	yes	25.5588	1.66667	0.5	Q1	4	Q3	60
168231205002	no	8	60	male	63	Married	Elementary school and below	rural	Never	>1m	no	no	24.9882	2.66667	1	Q3	8	Q3	60
168231205001	no	7	60	female	60	Married	Elementary school and below	rural	Current	no	yes	yes	26.9214	2.33333	1	Q3	8	Q3	60
168231213001	no	7	0	female	52	Married	High school	rural	Never	no	no	no	22.2698	2.33333	0	Q3	8	Q1	0
168231213002	no	7	1.5	male	53	Married	Elementary school and below	rural	Current	<1m	yes	no	19.4811	2.33333	0.025	Q3	8	Q3	60
168231201001	no	6	0	male	55	Married	Elementary school and below	rural	Current	>1m	yes	no	21.7161	2	0	Q2	6	Q1	0
168231201002	no	10	0	female	51	Married	Elementary school and below	rural	Never	no	no	no	23.2088	3.33333	0	Q4	9	Q1	0
168231211001	no	4	0	female	75	Non-married	Elementary school and below	rural	Never	no	yes	no	22.0633	1.33333	0	Q1	4	Q1	0
168231204001	no	9	0	female	78	Married	Elementary school and below	rural	Current	no	no	yes	26.5114	3	0	Q4	9	Q1	0
168231224001	no	6	1	male	54	Married	Elementary school and below	rural	Former	no	yes	no	25.0526	2	0.0166667	Q2	6	Q2	1
168231224002	no	4	0	female	48	Married	High school	rural	Current	no	no	no	25.5966	1.33333	0	Q1	4	Q1	0
168231203001	no	9	0	female	75	Married	Elementary school and below	rural	Current	>1m	yes	no	21.6703	3	0	Q4	9	Q1	0
168231218002	no	8	90	female	47	Married	High school	rural	Never	no	yes	no	24.0055	2.66667	1.5	Q3	8	Q4	120
168231206002	no	3	20	male	59	Married	Elementary school and below	rural	Never	no	yes	no	25.1311	1	0.333333	Q1	4	Q3	60
168231206001	no	6	60	female	59	Married	Elementary school and below	rural	Current	no	no	no	18.8672	2	1	Q2	6	Q3	60
168231220001	no	6	0	male	45	Married	High school	rural	Current	no	no	no	23.4191	2	0	Q2	6	Q1	0
168231220002	no	7.5	0	female	46	Married	Elementary school and below	rural	Never	no	no	no	17.5177	2.5	0	Q3	8	Q1	0
168231202001	no	10	0	female	71	Non-married	Elementary school and below	rural	Current	no	yes	no	20.9666	3.33333	0	Q4	9	Q1	0
168231223002	no	7	0	male	57	Married	Elementary school and below	rural	Current	>1m	yes	no	22.5506	2.33333	0	Q3	8	Q1	0
168231223001	no	6	0	female	56	Married	Elementary school and below	rural	Never	no	yes	no	27.9306	2	0	Q2	6	Q1	0
168231208001	no	7	0	male	57	Married	Elementary school and below	rural	Current	no	no	no	20.0458	2.33333	0	Q3	8	Q1	0
168231208002	no	7	0	female	58	Married	Elementary school and below	rural	Never	no	yes	no	23.1008	2.33333	0	Q3	8	Q1	0
168231210002	no	12	0	male	73	Married	Elementary school and below	rural	Former	<1m	yes	no	24.4611	4	0	Q4	9	Q1	0
168231219001	no	6	0	female	50	Married	Elementary school and below	rural	Never	no	yes	no	33.4154	2	0	Q2	6	Q1	0
168231219002	no	7	0	male	49	Married	Elementary school and below	rural	Current	>1m	no	no	25.8581	2.33333	0	Q3	8	Q1	0
168231222002	no	9	30	male	59	Married	Elementary school and below	rural	Never	no	yes	no	27.0861	3	0.5	Q4	9	Q3	60
168231222001	no	7	10	female	61	Married	Elementary school and below	rural	Never	no	no	no	24.8973	2.33333	0.166667	Q3	8	Q3	60
168231207002	no	8	60	male	71	Married	Elementary school and below	rural	Former	>1m	no	no	25.235	2.66667	1	Q3	8	Q3	60
168231207001	no	6	60	female	57	Married	Elementary school and below	rural	Never	no	yes	no	31.8844	2	1	Q2	6	Q3	60
168231217001	no	5	0	male	55	Married	Elementary school and below	rural	Current	no	no	no	21.6806	1.66667	0	Q1	4	Q1	0
168231217002	no	6	30	female	57	Married	Elementary school and below	rural	Never	no	yes	no	22.7728	2	0.5	Q2	6	Q3	60
168231209001	no	8	0	male	53	Married	High school	rural	Never	>1m	no	no	20.3094	2.66667	0	Q3	8	Q1	0
168231209002	no	6	0	female	51	Married	Elementary school and below	rural	Never	no	no	no	18.3594	2	0	Q2	6	Q1	0
168231221001	no	7	1	male	56	Married	Elementary school and below	rural	Never	>1m	yes	no	30.4506	2.33333	0.0166667	Q3	8	Q2	1
168231221002	no	6	0	female	54	Married	Elementary school and below	rural	Never	no	no	no	22.8664	2	0	Q2	6	Q1	0
168231212002	no	5	0	male	65	Married	Elementary school and below	rural	Current	no	no	no	17.6251	1.66667	0	Q1	4	Q1	0
168231212001	no	5	0	female	61	Married	Elementary school and below	rural	Never	no	no	no	19.3157	1.66667	0	Q1	4	Q1	0
168231110001	no	5	60	male	51	Married	High school	rural	Current	>1m	no	no	22.9259	1.66667	1	Q1	4	Q3	60
168231110002	no	9	0	female	53	Married	High school	rural	Never	no	no	no	23.1318	3	0	Q4	9	Q1	0
168231101001	no	3.5	60	male	70	divorced	Elementary school and below	rural	Never	>1m	no	no	21.1705	1.16667	1	Q1	4	Q3	60
168231120001	no	7	0	male	56	Married	Elementary school and below	rural	Current	>1m	no	no	22.8771	2.33333	0	Q3	8	Q1	0
168231120002	no	6	0	female	55	Married	Elementary school and below	rural	Never	no	no	no	22.8564	2	0	Q2	6	Q1	0
168231106001	no	5	0	female	47	Married	Elementary school and below	rural	Never	no	no	no	26.0449	1.66667	0	Q1	4	Q1	0
168231106002	no	6	70	male	54	Married	High school	rural	Current	no	yes	no	25.0156	2	1.16667	Q2	6	Q4	120
168231114002	no	8	60	male	63	Married	Elementary school and below	rural	Current	>1m	no	no	21.8778	2.66667	1	Q3	8	Q3	60
168231114001	no	7	30	female	64	Married	Elementary school and below	rural	Current	no	yes	no	24.9559	2.33333	0.5	Q3	8	Q3	60
168231124002	no	8	120	male	60	Married	High school	rural	Current	>1m	no	no	21.9977	2.66667	2	Q3	8	Q4	120
168231124001	no	5	120	female	64	Married	Elementary school and below	rural	Never	no	no	no	24.0082	1.66667	2	Q1	4	Q4	120
168231104001	no	6	3	male	66	Married	Elementary school and below	rural	Never	no	no	no	25.2002	2	0.05	Q2	6	Q3	60
168231104002	yes	5	120	female	57	Married	Elementary school and below	rural	Never	no	yes	no	26.3246	1.66667	2	Q1	4	Q4	120
168231108001	no	6	0	female	56	Married	Elementary school and below	rural	Current	no	no	no	28.0095	2	0	Q2	6	Q1	0
168231107002	no	5	0	male	64	Married	Elementary school and below	rural	Current	no	no	no	20.4701	1.66667	0	Q1	4	Q1	0
168231107001	yes	5	0	female	60	Married	Elementary school and below	rural	Current	no	no	no	18.9816	1.66667	0	Q1	4	Q1	0
168231109001	no	6	40	male	60	Married	Elementary school and below	rural	Never	no	no	no	24.0238	2	0.666667	Q2	6	Q3	60
168231126001	no	6	0	male	60	Married	Elementary school and below	rural	Never	no	yes	no	24.2491	2	0	Q2	6	Q1	0
168231126002	no	5	30	female	62	Married	Elementary school and below	rural	Never	no	no	no	25.1111	1.66667	0.5	Q1	4	Q3	60
168231116001	no	7	0	male	57	Married	High school	rural	Current	>1m	no	no	23.1164	2.33333	0	Q3	8	Q1	0
168231116002	no	6	0	female	55	Married	Elementary school and below	rural	Current	no	no	no	21.8715	2	0	Q2	6	Q1	0
168231115001	no	5	0	male	60	Married	Elementary school and below	rural	Current	>1m	no	no	20.7625	1.66667	0	Q1	4	Q1	0
168231115002	no	6	0	female	60	Married	High school	rural	Current	no	no	no	20.2261	2	0	Q2	6	Q1	0
168231127002	no	7	2	female	50	Married	Elementary school and below	rural	Never	no	no	no	18.0519	2.33333	0.0333333	Q3	8	Q3	60
168231118001	no	6	60	male	63	Married	Elementary school and below	rural	Current	>1m	yes	no	26.7737	2	1	Q2	6	Q3	60
168231118002	no	7	0	female	60	Married	Elementary school and below	rural	Never	no	no	no	21.9671	2.33333	0	Q3	8	Q1	0
168231102001	no	6	0	male	46	Non-married	Elementary school and below	rural	Current	no	no	no	23.1882	2	0	Q2	6	Q1	0
168231105002	no	7	60	male	63	Married	High school	rural	Current	>1m	yes	no	26.8117	2.33333	1	Q3	8	Q3	60
168231105001	no	7	40	female	63	Married	Elementary school and below	rural	Never	no	yes	no	26.3288	2.33333	0.666667	Q3	8	Q3	60
168231122001	no	4	0	female	64	Non-married	High school	rural	Never	>1m	no	no	26.4583	1.33333	0	Q1	4	Q1	0
168231103002	no	7	0	male	58	Married	Elementary school and below	rural	Current	no	no	no	25.8423	2.33333	0	Q3	8	Q1	0
168231103001	no	4	0	female	56	Married	Elementary school and below	rural	Never	no	yes	no	19.6475	1.33333	0	Q1	4	Q1	0
168231121001	no	6	60	male	63	Married	Elementary school and below	rural	Former	>1m	no	no	23.1747	2	1	Q2	6	Q3	60
168231121002	no	8	30	female	63	Married	Elementary school and below	rural	Current	>1m	yes	no	19.9185	2.66667	0.5	Q3	8	Q3	60
168231125002	no	4	0	male	57	Married	Elementary school and below	rural	Current	>1m	no	no	22.6394	1.33333	0	Q1	4	Q1	0
168231112002	no	7	0	female	50	Married	Elementary school and below	rural	Never	no	no	no	33.7774	2.33333	0	Q3	8	Q1	0
168231129002	no	6	60	male	48	Married	High school	rural	Former	>1m	no	no	19.2899	2	1	Q2	6	Q3	60
168231129001	no	10	0	female	49	Married	Elementary school and below	rural	Never	no	no	no	23.8877	3.33333	0	Q4	9	Q1	0
168231113002	no	5	60	male	58	Married	Elementary school and below	rural	Never	no	no	no	24.6539	1.66667	1	Q1	4	Q3	60
168231113001	no	6	0	female	57	Married	Elementary school and below	rural	Never	no	no	no	24.1178	2	0	Q2	6	Q1	0
168231128001	no	4	0	male	77	Married	Elementary school and below	rural	Current	>1m	yes	yes	20.2459	1.33333	0	Q1	4	Q1	0
168231315002	no	7	0	female	53	Married	Elementary school and below	urban	Never	no	yes	no	28.3966	2.33333	0	Q3	8	Q1	0
168231321002	no	5	0	male	63	Married	Elementary school and below	urban	Current	>1m	no	no	33.2389	1.66667	0	Q1	4	Q1	0
168231321001	no	7	0	female	64	Married	High school	urban	Never	no	no	no	28.6416	2.33333	0	Q3	8	Q1	0
168231319001	no	5	0	female	77	Married	Elementary school and below	urban	Current	no	yes	no	23.8118	1.66667	0	Q1	4	Q1	0
168231314002	no	6	20	female	59	Married	Elementary school and below	urban	Never	no	yes	yes	33.4681	2	0.333333	Q2	6	Q3	60
168231314001	no	6	40	male	58	Married	High school	urban	Never	>1m	yes	no	27.0086	2	0.666667	Q2	6	Q3	60
168231317002	no	6	0	male	65	Married	High school	urban	Former	>1m	yes	no	23.9592	2	0	Q2	6	Q1	0
168231317001	no	7	0	female	63	Married	High school	urban	Never	no	yes	no	25.9174	2.33333	0	Q3	8	Q1	0
168231312002	no	6	60	male	73	Married	Elementary school and below	urban	Never	no	yes	yes	21.8997	2	1	Q2	6	Q3	60
168231312001	no	6	20	female	71	Married	Elementary school and below	urban	Never	no	yes	yes	24.5728	2	0.333333	Q2	6	Q3	60
168231304002	no	6	0	female	49	Married	High school	urban	Never	>1m	no	no	19.728	2	0	Q2	6	Q1	0
168231316002	no	7	60	male	55	Married	High school	urban	Current	>1m	yes	no	27.0755	2.33333	1	Q3	8	Q3	60
168231316001	no	7	60	female	55	Married	High school	urban	Never	no	yes	no	28.4074	2.33333	1	Q3	8	Q3	60
168231306001	no	7	20	male	50	Married	High school	urban	Current	>1m	no	yes	20.6584	2.33333	0.333333	Q3	8	Q3	60
168231306002	no	5	0	female	49	Married	High school	urban	Never	no	yes	no	20.7922	1.66667	0	Q1	4	Q1	0
168231307002	no	8	0	male	56	Married	High school	urban	Current	>1m	yes	no	27.2372	2.66667	0	Q3	8	Q1	0
168231307001	no	5	60	female	55	Married	High school	urban	Never	no	yes	no	29.0284	1.66667	1	Q1	4	Q3	60
168231320001	no	8	0	female	51	Married	High school	urban	Never	no	no	no	21.7844	2.66667	0	Q3	8	Q1	0
168231320002	no	10	120	male	51	Married	High school	urban	Current	>1m	no	no	16.8004	3.33333	2	Q4	9	Q4	120
168231305002	no	8	0	male	50	Married	High school	urban	Current	>1m	no	yes	26.4096	2.66667	0	Q3	8	Q1	0
168231305001	no	9	0	female	45	Married	High school	urban	Never	no	no	no	27.1962	3	0	Q4	9	Q1	0
168231302002	no	4	30	male	69	Married	college and higher	urban	Never	>1m	no	no	21.1096	1.33333	0.5	Q1	4	Q3	60
168231302001	no	7	60	female	72	Married	Elementary school and below	urban	Never	no	yes	no	24.1174	2.33333	1	Q3	8	Q3	60
168231310001	no	6	0	male	68	Non-married	High school	urban	Current	no	yes	no	26.1162	2	0	Q2	6	Q1	0
168231308001	no	6	0	female	68	Married	High school	urban	Never	no	yes	yes	22.9616	2	0	Q2	6	Q1	0
166006214001	yes	2	0	female	61	Married	Elementary school and below	rural	Never	no	yes	no	17.897	0.666667	0	Q1	4	Q1	0
166006216001	no	8	0	male	66	Married	Elementary school and below	rural	Never	no	no	no	18.5196	2.66667	0	Q3	8	Q1	0
166006216002	no	6	0	female	61	Married	Elementary school and below	rural	Never	no	no	no	18.3073	2	0	Q2	6	Q1	0
166006215001	no	7	40	male	54	Married	High school	rural	Current	>1m	no	no	22.8287	2.33333	0.666667	Q3	8	Q3	60
166006215002	no	7	30	female	52	Married	Elementary school and below	rural	Never	no	yes	no	25.3887	2.33333	0.5	Q3	8	Q3	60
166006201001	no	10	0	female	75	Non-married	Elementary school and below	rural	Never	no	no	no	15.8625	3.33333	0	Q4	9	Q1	0
166006212001	no	7	60	female	50	Married	Elementary school and below	rural	Never	no	no	no	28.7168	2.33333	1	Q3	8	Q3	60
166006221001	no	6	40	female	60	Married	Elementary school and below	rural	Never	no	no	no	22.6299	2	0.666667	Q2	6	Q3	60
166006221002	no	6	60	male	62	Married	Elementary school and below	rural	Current	>1m	yes	no	27.9297	2	1	Q2	6	Q3	60
166006218001	no	4	0	female	54	Non-married	Elementary school and below	rural	Current	no	no	no	26.2952	1.33333	0	Q1	4	Q1	0
166006202002	no	7	0	male	49	Married	High school	rural	Never	>1m	no	no	21.3114	2.33333	0	Q3	8	Q1	0
166006202001	no	7	0	female	47	Married	Elementary school and below	rural	Never	no	no	no	32.1336	2.33333	0	Q3	8	Q1	0
166006219001	no	6	60	female	61	Married	Elementary school and below	rural	Never	no	no	no	21.8562	2	1	Q2	6	Q3	60
166006219002	no	7	60	male	60	Married	Elementary school and below	rural	Current	<1m	yes	no	19.1791	2.33333	1	Q3	8	Q3	60
166006210001	no	4	30	female	47	Married	Elementary school and below	rural	Never	no	no	no	25.803	1.33333	0.5	Q1	4	Q3	60
166006210002	no	5	60	male	49	Married	High school	rural	Former	>1m	no	yes	20.464	1.66667	1	Q1	4	Q3	60
166006209002	no	8	2	male	49	Married	Elementary school and below	rural	Current	>1m	no	no	23.188	2.66667	0.0333333	Q3	8	Q3	60
166006220001	no	5	0	female	50	Married	Elementary school and below	rural	Never	no	no	yes	21.2239	1.66667	0	Q1	4	Q1	0
166006220002	no	6	0	male	50	Married	High school	rural	Never	<1m	yes	no	22.1349	2	0	Q2	6	Q1	0
166006207001	no	4	0	female	58	Married	High school	rural	Never	no	yes	no	28.0336	1.33333	0	Q1	4	Q1	0
166006206001	no	8	2	male	63	Married	High school	rural	Current	>1m	yes	no	18.8852	2.66667	0.0333333	Q3	8	Q3	60
166006206002	no	10	3	female	61	Married	Elementary school and below	rural	Never	no	yes	yes	27.6946	3.33333	0.05	Q4	9	Q3	60
166006213001	no	6	2	male	51	Married	High school	rural	Current	>1m	yes	no	31.0971	2	0.0333333	Q2	6	Q3	60
166006213002	no	6	0	female	52	Married	Elementary school and below	rural	Never	no	no	no	24.7601	2	0	Q2	6	Q1	0
166006208001	no	4	0	female	50	Married	Elementary school and below	rural	Never	no	no	no	28.3799	1.33333	0	Q1	4	Q1	0
166006222001	no	6	1	female	66	Married	High school	rural	Never	no	yes	no	27.4628	2	0.0166667	Q2	6	Q2	1
166006222002	no	6	1	male	64	Married	High school	rural	Never	no	no	no	22.509	2	0.0166667	Q2	6	Q2	1
166006323002	no	6	0	male	52	Married	Elementary school and below	rural	Current	<1m	no	yes	20.7533	2	0	Q2	6	Q1	0
166006308001	no	5	1	female	60	Married	Elementary school and below	rural	Never	no	yes	no	31.8529	1.66667	0.0166667	Q1	4	Q2	1
166006308002	no	7	1	male	62	Married	Elementary school and below	rural	Current	>1m	yes	no	22.867	2.33333	0.0166667	Q3	8	Q2	1
166006311002	no	7	0	female	51	Married	Elementary school and below	rural	Never	no	no	no	21.7287	2.33333	0	Q3	8	Q1	0
166006311001	no	5	0	male	49	Married	Elementary school and below	rural	Current	<1m	no	no	24.1565	1.66667	0	Q1	4	Q1	0
166006306002	no	7	0	male	53	Married	Elementary school and below	rural	Current	<1m	yes	no	24.749	2.33333	0	Q3	8	Q1	0
166006306001	no	2	0	female	53	Married	High school	rural	Never	no	no	no	21.2043	0.666667	0	Q1	4	Q1	0
166006325002	no	10	120	male	50	Married	High school	rural	Never	no	yes	yes	25.4996	3.33333	2	Q4	9	Q4	120
166006325001	no	8	120	female	52	Married	Elementary school and below	rural	Never	no	no	no	30.0835	2.66667	2	Q3	8	Q4	120
166006320002	no	6	0	male	59	Married	Elementary school and below	rural	Current	>1m	yes	no	21.0772	2	0	Q2	6	Q1	0
166006320001	no	7	0	female	60	Married	Elementary school and below	rural	Never	no	no	no	30.8522	2.33333	0	Q3	8	Q1	0
166006321001	no	8	2	male	58	Married	Elementary school and below	rural	Former	>1m	yes	yes	26.0525	2.66667	0.0333333	Q3	8	Q3	60
166006321002	no	8	2	female	54	Married	Elementary school and below	rural	Never	no	yes	no	22.4739	2.66667	0.0333333	Q3	8	Q3	60
166006303001	no	6	0	female	63	Married	Elementary school and below	rural	Never	no	no	no	23.8517	2	0	Q2	6	Q1	0
166006322002	no	8	1	female	54	Married	Elementary school and below	rural	Never	no	no	no	21.9168	2.66667	0.0166667	Q3	8	Q2	1
166006322001	no	8	1	male	53	Married	High school	rural	Current	no	yes	no	19.503	2.66667	0.0166667	Q3	8	Q2	1
166006324001	no	6	90	male	54	Married	Elementary school and below	rural	Former	>1m	yes	no	25.0248	2	1.5	Q2	6	Q4	120
166006324002	no	4	0	female	59	Married	Elementary school and below	rural	Never	no	no	no	23.854	1.33333	0	Q1	4	Q1	0
166006301002	no	10	30	male	61	Married	Elementary school and below	rural	Current	no	no	no	19.791	3.33333	0.5	Q4	9	Q3	60
166006301001	no	5	20	female	59	Married	Elementary school and below	rural	Never	no	yes	no	25.6264	1.66667	0.333333	Q1	4	Q3	60
166006310001	no	10	0	male	54	Married	Elementary school and below	rural	Current	<1m	no	no	21.2163	3.33333	0	Q4	9	Q1	0
166006310002	no	8	0	female	53	Married	Elementary school and below	rural	Never	no	no	no	22.1218	2.66667	0	Q3	8	Q1	0
166006302002	no	7	0	male	56	Married	High school	rural	Never	>1m	yes	no	25.442	2.33333	0	Q3	8	Q1	0
166006302001	no	7	0	female	56	Married	Elementary school and below	rural	Never	no	yes	no	23.0405	2.33333	0	Q3	8	Q1	0
166006317002	no	3	1	male	61	Married	Elementary school and below	rural	Current	<1m	no	no	19.193	1	0.0166667	Q1	4	Q2	1
166006317001	no	8	1	female	58	Married	Elementary school and below	rural	Never	no	no	no	25.7196	2.66667	0.0166667	Q3	8	Q2	1
166006315001	no	7	1	male	60	Non-married	Elementary school and below	rural	Current	no	yes	no	24.3256	2.33333	0.0166667	Q3	8	Q2	1
166006305002	no	3	2	male	75	Married	Elementary school and below	rural	Current	no	yes	no	20.558	1	0.0333333	Q1	4	Q3	60
166006305001	no	5	0	female	73	Married	Elementary school and below	rural	Never	no	yes	no	18.2796	1.66667	0	Q1	4	Q1	0
166006304002	no	7	0	male	61	Married	Elementary school and below	rural	Never	no	no	no	20.3494	2.33333	0	Q3	8	Q1	0
166006304001	no	3	0	female	58	Married	Elementary school and below	rural	Never	no	no	no	22.8563	1	0	Q1	4	Q1	0
166006319002	no	6	0	male	59	Married	High school	rural	Current	<1m	no	no	21.1716	2	0	Q2	6	Q1	0
166006319001	no	6	0	female	54	Married	High school	rural	Never	no	yes	no	26.9331	2	0	Q2	6	Q1	0
166006314001	no	8	2	female	49	Married	Elementary school and below	rural	Never	no	yes	no	23.3305	2.66667	0.0333333	Q3	8	Q3	60
166006309001	no	7	0	female	57	Married	Elementary school and below	rural	Never	no	yes	no	31.8778	2.33333	0	Q3	8	Q1	0
166006312001	no	6	120	male	62	Married	Elementary school and below	rural	Current	>1m	yes	no	19.5965	2	2	Q2	6	Q4	120
166006312002	no	3	0	female	59	Married	Elementary school and below	rural	Current	no	no	no	24.6171	1	0	Q1	4	Q1	0
166006115002	no	4	0	female	54	Married	High school	rural	Never	no	yes	no	22.5366	1.33333	0	Q1	4	Q1	0
166006107001	no	6	0	female	78	Non-married	Elementary school and below	rural	Never	no	yes	no	15.9357	2	0	Q2	6	Q1	0
166006111001	no	6	0	male	65	Married	Elementary school and below	rural	Never	>1m	yes	no	22.3825	2	0	Q2	6	Q1	0
166006111002	no	0.5	20	female	59	Married	Elementary school and below	rural	Never	no	yes	no	26.0957	0.166667	0.333333	Q1	4	Q3	60
166006105001	yes	4	30	female	66	Married	Elementary school and below	rural	Never	no	no	yes	20.2442	1.33333	0.5	Q1	4	Q3	60
166006105002	no	6	30	male	66	Married	High school	rural	Never	no	no	no	19.1408	2	0.5	Q2	6	Q3	60
166006104001	no	4	0	female	50	Married	Elementary school and below	rural	Never	no	no	no	25.122	1.33333	0	Q1	4	Q1	0
166006104002	no	8	2	male	48	Married	Elementary school and below	rural	Never	>1m	yes	no	28.6979	2.66667	0.0333333	Q3	8	Q3	60
166006103001	no	6	0	male	49	Married	Elementary school and below	rural	Current	no	no	no	21.8045	2	0	Q2	6	Q1	0
166006103002	no	9	2	female	47	Married	Elementary school and below	rural	Never	no	no	no	25.5081	3	0.0333333	Q4	9	Q3	60
166006108001	no	7	0	male	79	Married	Elementary school and below	rural	Current	no	yes	no	19.5152	2.33333	0	Q3	8	Q1	0
166006106002	no	6	0	female	52	Married	Elementary school and below	rural	Never	no	no	no	21.986	2	0	Q2	6	Q1	0
166006114002	no	4	2	male	48	Married	Elementary school and below	rural	Current	no	yes	no	20.1321	1.33333	0.0333333	Q1	4	Q3	60
166006114001	no	8	0	female	46	Married	Elementary school and below	rural	Never	no	no	no	19.7313	2.66667	0	Q3	8	Q1	0
166006109001	no	7	1	female	82	Non-married	Elementary school and below	rural	Current	no	yes	no	28.8866	2.33333	0.0166667	Q3	8	Q2	1
166006118002	no	8	90	male	48	Married	High school	rural	Former	>1m	no	no	24.7176	2.66667	1.5	Q3	8	Q4	120
166006118001	no	6	60	female	47	Married	High school	rural	Never	<1m	no	no	26.87	2	1	Q2	6	Q3	60
166006110001	no	7	1	female	47	Married	Elementary school and below	rural	Never	>1m	no	no	23.6127	2.33333	0.0166667	Q3	8	Q2	1
166006112001	no	6	1	male	54	Non-married	Elementary school and below	rural	Current	<1m	yes	no	20.4507	2	0.0166667	Q2	6	Q2	1
212428326001	no	4	0	female	61	Married	Elementary school and below	urban	Former	<1m	yes	no	29.7123	1.33333	0	Q1	4	Q1	0
212428312001	no	6	0	female	58	Married	Elementary school and below	urban	Never	no	no	no	24.9131	2	0	Q2	6	Q1	0
212428304002	no	6	30	male	67	Married	college and higher	urban	Current	no	no	yes	21.8585	2	0.5	Q2	6	Q3	60
212428304001	no	6	60	female	67	Married	college and higher	urban	Never	no	no	yes	19.2681	2	1	Q2	6	Q3	60
212428306002	no	8	60	male	46	Married	Elementary school and below	urban	Current	no	no	no	20.6481	2.66667	1	Q3	8	Q3	60
212428306001	no	8	0	female	45	Married	High school	urban	Former	no	no	no	22.3326	2.66667	0	Q3	8	Q1	0
212428322002	no	8	60	male	49	Married	High school	urban	Current	>1m	no	no	21.5592	2.66667	1	Q3	8	Q3	60
212428322001	no	5	0	female	45	Married	Elementary school and below	urban	Never	no	yes	no	28.3871	1.66667	0	Q1	4	Q1	0
212428319002	no	5	0	male	48	Married	High school	urban	Current	>1m	yes	no	21.5163	1.66667	0	Q1	4	Q1	0
212428319001	no	7	0	female	48	Married	High school	urban	Never	no	no	no	23.7399	2.33333	0	Q3	8	Q1	0
212428318002	no	12	120	male	61	Married	High school	urban	Current	>1m	no	yes	26.4849	4	2	Q4	9	Q4	120
212428318001	no	6	20	female	61	Married	High school	urban	Never	no	yes	yes	24.4589	2	0.333333	Q2	6	Q3	60
212428314002	no	4	0	female	50	Married	High school	urban	Never	<1m	no	no	23.3196	1.33333	0	Q1	4	Q1	0
212428314001	no	7	0	male	51	Married	High school	urban	Current	>1m	no	yes	21.9727	2.33333	0	Q3	8	Q1	0
212428333001	no	8	0	female	60	Married	High school	urban	Never	no	no	yes	24.9069	2.66667	0	Q3	8	Q1	0
212428333002	no	5	0	male	61	Married	Elementary school and below	urban	Current	<1m	no	no	19.9466	1.66667	0	Q1	4	Q1	0
212428324002	no	7	30	male	59	Married	High school	urban	Current	no	no	no	22.2151	2.33333	0.5	Q3	8	Q3	60
212428324001	no	8	0	female	59	Married	High school	urban	Never	no	no	no	23.575	2.66667	0	Q3	8	Q1	0
212428330002	no	7	60	male	58	Married	High school	urban	Never	>1m	no	no	21.6614	2.33333	1	Q3	8	Q3	60
212428330001	no	5	0	female	59	Married	Elementary school and below	urban	Never	no	yes	yes	28.0837	1.66667	0	Q1	4	Q1	0
212428331002	no	8	15	male	58	Married	High school	urban	Former	>1m	yes	no	23.3604	2.66667	0.25	Q3	8	Q3	60
212428331001	no	7	30	female	55	Married	High school	urban	Never	>1m	no	no	22.0165	2.33333	0.5	Q3	8	Q3	60
212428321001	no	7	60	male	56	Married	High school	urban	Current	>1m	no	no	23.1336	2.33333	1	Q3	8	Q3	60
212428321002	no	6	0	female	54	Married	High school	urban	Never	no	no	no	26.1861	2	0	Q2	6	Q1	0
212428309001	no	6	30	female	73	Married	Elementary school and below	urban	Former	no	yes	no	29.9805	2	0.5	Q2	6	Q3	60
212428316002	no	7	0	female	48	Married	High school	urban	Never	no	no	no	28.7143	2.33333	0	Q3	8	Q1	0
212428313001	no	7	0	male	47	Married	High school	urban	Never	no	no	no	24.4757	2.33333	0	Q3	8	Q1	0
212428313002	no	8	0	female	46	Married	High school	urban	Never	no	no	no	18.6328	2.66667	0	Q3	8	Q1	0
212428303002	no	8	0	male	49	Married	High school	urban	Current	>1m	yes	yes	25.3206	2.66667	0	Q3	8	Q1	0
212428303001	no	8	0	female	48	Married	High school	urban	Never	>1m	no	no	28.8066	2.66667	0	Q3	8	Q1	0
212428311002	no	8	0	male	58	Married	High school	urban	Current	no	no	no	20.1305	2.66667	0	Q3	8	Q1	0
212428311001	no	6	30	female	60	Married	Elementary school and below	urban	Current	no	yes	no	27.3009	2	0.5	Q2	6	Q3	60
212428332002	no	7	60	male	61	Married	High school	urban	Current	>1m	no	no	22.9634	2.33333	1	Q3	8	Q3	60
212428332001	no	7	60	female	59	Married	Elementary school and below	urban	Current	no	yes	no	31.8612	2.33333	1	Q3	8	Q3	60
212428317002	no	6	0	male	54	Married	High school	urban	Former	no	yes	no	27.0845	2	0	Q2	6	Q1	0
212428317001	no	8	10	female	54	Married	High school	urban	Never	no	no	no	27.0772	2.66667	0.166667	Q3	8	Q3	60
212428329002	no	6	0	male	59	Married	High school	urban	Current	<1m	no	no	23.5256	2	0	Q2	6	Q1	0
212428329001	no	8	30	female	57	Married	High school	urban	Never	no	yes	no	30.6741	2.66667	0.5	Q3	8	Q3	60
212428325001	no	8	60	female	57	Married	Elementary school and below	urban	Current	no	yes	yes	25.3565	2.66667	1	Q3	8	Q3	60
212428325002	no	8	0	male	61	Married	High school	urban	Current	>1m	no	no	26.6564	2.66667	0	Q3	8	Q1	0
212428211002	no	7	0	male	59	Married	High school	urban	Current	>1m	no	no	27.1659	2.33333	0	Q3	8	Q1	0
212428211001	no	8	15	female	59	Married	High school	urban	Never	no	no	no	23.9565	2.66667	0.25	Q3	8	Q3	60
212428202002	no	6	30	male	71	Married	High school	urban	Never	no	yes	no	25.8062	2	0.5	Q2	6	Q3	60
212428219002	no	3	0	male	59	Married	High school	urban	Current	no	no	no	24.4399	1	0	Q1	4	Q1	0
212428215002	no	3	20	female	66	Married	High school	urban	Never	no	no	no	18.3658	1	0.333333	Q1	4	Q3	60
212428215001	no	7	30	male	67	Married	Elementary school and below	urban	Former	no	yes	yes	22.2591	2.33333	0.5	Q3	8	Q3	60
212428218001	no	5	60	male	51	Married	High school	urban	Former	>1m	no	no	24.936	1.66667	1	Q1	4	Q3	60
212428218002	no	5	0	female	49	Married	High school	urban	Former	no	no	no	26.0497	1.66667	0	Q1	4	Q1	0
212428214002	no	8	0	female	56	Married	Elementary school and below	urban	Current	no	yes	no	24.1375	2.66667	0	Q3	8	Q1	0
212428206002	no	8	60	male	63	Married	High school	urban	Former	>1m	no	yes	30.3398	2.66667	1	Q3	8	Q3	60
212428206001	no	8	0	female	57	Married	High school	urban	Former	no	no	no	24.6151	2.66667	0	Q3	8	Q1	0
212428213002	no	8	0	male	64	Married	college and higher	urban	Never	no	yes	no	29.9844	2.66667	0	Q3	8	Q1	0
212428212001	no	7	0	female	55	Married	High school	urban	Never	<1m	no	no	21.1979	2.33333	0	Q3	8	Q1	0
212428115002	no	7	0	male	58	Married	High school	urban	Current	>1m	yes	no	22.1247	2.33333	0	Q3	8	Q1	0
212428115001	no	7	0	female	58	Married	Elementary school and below	urban	Never	no	no	no	27.7462	2.33333	0	Q3	8	Q1	0
212428113001	no	8	120	male	53	Married	High school	urban	Former	>1m	yes	no	22.7342	2.66667	2	Q3	8	Q4	120
212428113002	no	8	0	female	52	Married	college and higher	urban	Never	>1m	no	no	24.8676	2.66667	0	Q3	8	Q1	0
212428117001	no	6	60	female	77	Married	Elementary school and below	urban	Never	no	yes	no	21.7149	2	1	Q2	6	Q3	60
212428118002	no	6	0	female	49	Married	High school	urban	Never	no	yes	no	25.9317	2	0	Q2	6	Q1	0
212428106002	no	7	0	male	45	Married	High school	urban	Current	no	no	no	22.5648	2.33333	0	Q3	8	Q1	0
212428106001	no	7	60	female	45	Married	Elementary school and below	urban	Never	no	yes	yes	29.1283	2.33333	1	Q3	8	Q3	60
212428104001	no	4	60	female	60	Married	Elementary school and below	urban	Never	no	yes	no	20.8473	1.33333	1	Q1	4	Q3	60
212428107002	no	7	0	male	54	Married	High school	urban	Current	>1m	no	no	28.7253	2.33333	0	Q3	8	Q1	0
212428107001	no	6	60	female	50	Married	High school	urban	Never	no	yes	yes	24.6165	2	1	Q2	6	Q3	60
212428119001	no	5	0	male	63	Married	High school	urban	Current	no	no	no	25.1696	1.66667	0	Q1	4	Q1	0
212428119002	no	5	60	female	61	Married	Elementary school and below	urban	Never	no	yes	yes	29.3592	1.66667	1	Q1	4	Q3	60
212428112001	no	8	90	male	57	Married	High school	urban	Current	no	no	no	20.4363	2.66667	1.5	Q3	8	Q4	120
212428121002	no	7	0	male	63	Married	High school	urban	Former	>1m	yes	yes	23.4391	2.33333	0	Q3	8	Q1	0
212428121001	no	7	0	female	62	Married	Elementary school and below	urban	Never	no	yes	no	22.5654	2.33333	0	Q3	8	Q1	0
212428103002	no	7	60	female	70	Married	High school	urban	Current	no	yes	no	23.0577	2.33333	1	Q3	8	Q3	60
212428108002	no	8	60	male	59	Married	Elementary school and below	urban	Former	>1m	yes	no	23.4816	2.66667	1	Q3	8	Q3	60
212428108001	no	8	60	female	52	Married	High school	urban	Never	no	no	no	21.3793	2.66667	1	Q3	8	Q3	60
211176124002	no	6	0	female	47	Married	High school	rural	Never	no	no	no	22.7945	2	0	Q2	6	Q1	0
211176110002	no	5	0	female	49	Married	High school	rural	Never	no	yes	no	21.9586	1.66667	0	Q1	4	Q1	0
211176106001	no	8	0	female	54	Married	Elementary school and below	rural	Current	no	no	yes	26.2251	2.66667	0	Q3	8	Q1	0
211176115001	no	8	90	male	56	Married	Elementary school and below	rural	Never	no	yes	no	30.4052	2.66667	1.5	Q3	8	Q4	120
211176115002	no	3	10	female	56	Married	Elementary school and below	rural	Former	no	no	no	27.2641	1	0.166667	Q1	4	Q3	60
211176119002	no	4	30	male	50	Married	Elementary school and below	rural	Current	no	no	no	22.7537	1.33333	0.5	Q1	4	Q3	60
211176119001	no	5	0	female	46	Married	Elementary school and below	rural	Never	no	no	no	22.4279	1.66667	0	Q1	4	Q1	0
211176107002	no	8	0	female	45	Married	Elementary school and below	rural	Current	no	no	no	23.4061	2.66667	0	Q3	8	Q1	0
211176111002	no	6	60	female	46	Married	High school	rural	Never	no	no	no	24.6505	2	1	Q2	6	Q3	60
211176125001	no	6	0	male	58	Married	High school	rural	Current	>1m	yes	no	17.186	2	0	Q2	6	Q1	0
211176125002	no	8	60	female	56	Married	Elementary school and below	rural	Current	no	no	no	17.2618	2.66667	1	Q3	8	Q3	60
211176130002	no	1	60	female	59	Married	Elementary school and below	rural	Current	no	yes	no	26.1783	0.333333	1	Q1	4	Q3	60
211176128001	no	8	60	male	60	Married	Elementary school and below	rural	Current	>1m	no	no	20.8612	2.66667	1	Q3	8	Q3	60
211176128002	no	8	60	female	64	Married	Elementary school and below	rural	Never	no	yes	no	25.1664	2.66667	1	Q3	8	Q3	60
211176127001	no	8	30	female	54	Married	Elementary school and below	rural	Current	no	yes	no	32.1605	2.66667	0.5	Q3	8	Q3	60
211176113002	no	10	60	male	56	Married	Elementary school and below	rural	Current	no	yes	no	19.8759	3.33333	1	Q4	9	Q3	60
211176113001	no	5	60	female	54	Married	Elementary school and below	rural	Current	no	no	no	26.8994	1.66667	1	Q1	4	Q3	60
211176102001	no	5	90	male	48	Married	Elementary school and below	rural	Never	>1m	no	no	29.6098	1.66667	1.5	Q1	4	Q4	120
211176102002	no	8	0	female	49	Married	High school	rural	Never	<1m	no	no	31.4799	2.66667	0	Q3	8	Q1	0
211176120002	no	10	30	female	59	Married	Elementary school and below	rural	Never	no	yes	no	26.2127	3.33333	0.5	Q4	9	Q3	60
211176101002	no	10	0	female	49	Married	Elementary school and below	rural	Current	no	no	no	18.3525	3.33333	0	Q4	9	Q1	0
211176116002	no	6	60	male	55	Married	Elementary school and below	rural	Never	>1m	no	no	20.9086	2	1	Q2	6	Q3	60
211176116001	no	6	60	female	57	Married	Elementary school and below	rural	Never	no	no	no	20.6102	2	1	Q2	6	Q3	60
211176103002	no	8	90	male	61	Married	Elementary school and below	rural	Current	no	no	no	19.3207	2.66667	1.5	Q3	8	Q4	120
211176108001	no	9	120	male	86	Non-married	Elementary school and below	rural	Never	no	no	no	22.9519	3	2	Q4	9	Q4	120
211176122001	no	4	60	male	57	Married	Elementary school and below	rural	Current	>1m	no	no	21.6188	1.33333	1	Q1	4	Q3	60
211176122002	no	5	120	female	53	Married	Elementary school and below	rural	Current	no	yes	no	26.4094	1.66667	2	Q1	4	Q4	120
211176112001	no	5	5	female	56	Married	High school	rural	Former	>1m	yes	no	21.8114	1.66667	0.0833333	Q1	4	Q3	60
211176105002	no	9	70	female	70	Married	Elementary school and below	rural	Current	no	no	no	21.1928	3	1.16667	Q4	9	Q4	120
211176114002	no	6	60	female	60	Married	Elementary school and below	rural	Never	no	no	no	22.4605	2	1	Q2	6	Q3	60
211176114001	no	10	60	male	62	Married	Elementary school and below	rural	Never	no	yes	no	23.7596	3.33333	1	Q4	9	Q3	60
211176129002	no	7	60	male	57	Married	Elementary school and below	rural	Current	>1m	no	no	21.9056	2.33333	1	Q3	8	Q3	60
211176129001	no	8	60	female	54	Married	Elementary school and below	rural	Never	no	yes	no	27.5233	2.66667	1	Q3	8	Q3	60
211176121002	no	6	0	female	63	Married	Elementary school and below	rural	Never	no	no	no	15.1838	2	0	Q2	6	Q1	0
211176121001	no	10	120	male	61	Married	Elementary school and below	rural	Current	>1m	no	no	18.3564	3.33333	2	Q4	9	Q4	120
211176126002	no	7	30	female	45	Married	High school	rural	Never	no	no	no	21.3462	2.33333	0.5	Q3	8	Q3	60
211176123002	no	6	30	female	66	Married	High school	rural	Current	no	no	no	15.1172	2	0.5	Q2	6	Q3	60
211176118001	no	7	90	male	57	Married	High school	rural	Never	>1m	no	no	21.5806	2.33333	1.5	Q3	8	Q4	120
211176118002	no	5	0	female	56	Married	Elementary school and below	rural	Current	no	yes	no	29.9272	1.66667	0	Q1	4	Q1	0
211176104001	no	10	90	male	54	Married	Elementary school and below	rural	Current	no	yes	no	17.2308	3.33333	1.5	Q4	9	Q4	120
211176203001	no	7	120	female	49	Married	High school	rural	Never	no	no	no	26.8127	2.33333	2	Q3	8	Q4	120
211176207002	no	7	0	female	57	Married	Elementary school and below	rural	Current	no	no	no	23.8004	2.33333	0	Q3	8	Q1	0
211176204002	no	3	60	male	56	Married	Elementary school and below	rural	Current	>1m	no	no	23.0887	1	1	Q1	4	Q3	60
211176204001	yes	5	10	female	55	Married	Elementary school and below	rural	Never	no	yes	no	19.3404	1.66667	0.166667	Q1	4	Q3	60
211176220002	no	7	60	female	46	Married	Elementary school and below	rural	Current	no	no	no	31.1097	2.33333	1	Q3	8	Q3	60
211176208002	no	4	60	female	60	Married	Elementary school and below	rural	Never	no	yes	no	23.7709	1.33333	1	Q1	4	Q3	60
211176223002	no	7	60	male	53	Married	Elementary school and below	rural	Never	>1m	no	no	23.9577	2.33333	1	Q3	8	Q3	60
211176223001	no	7	30	female	57	Married	Elementary school and below	rural	Former	no	no	no	21.8513	2.33333	0.5	Q3	8	Q3	60
211176205002	no	8	60	female	48	Married	Elementary school and below	rural	Never	no	no	no	32.7419	2.66667	1	Q3	8	Q3	60
211176214001	no	5	60	male	49	Married	Elementary school and below	rural	Never	no	no	no	27.3734	1.66667	1	Q1	4	Q3	60
211176214002	no	8	30	female	48	Married	Elementary school and below	rural	Never	no	no	no	24.6655	2.66667	0.5	Q3	8	Q3	60
211176211001	no	3	120	male	57	Married	Elementary school and below	rural	Never	<1m	no	no	18.3952	1	2	Q1	4	Q4	120
211176218001	no	5	30	male	62	Married	Elementary school and below	rural	Never	>1m	yes	no	21.7003	1.66667	0.5	Q1	4	Q3	60
211176218002	no	6	60	female	61	Married	Elementary school and below	rural	Never	no	no	no	27.6681	2	1	Q2	6	Q3	60
211176215001	no	7	0	male	54	Married	Elementary school and below	rural	Current	>1m	no	no	20.794	2.33333	0	Q3	8	Q1	0
211176215002	no	10	60	female	56	Married	Elementary school and below	rural	Never	no	yes	no	29.5003	3.33333	1	Q4	9	Q3	60
211176201002	no	8	0	male	56	Married	High school	rural	Never	>1m	no	no	23.564	2.66667	0	Q3	8	Q1	0
211176210002	no	7	60	male	56	Married	Elementary school and below	rural	Never	no	no	no	20.4428	2.33333	1	Q3	8	Q3	60
211176210001	no	7	60	female	56	Married	Elementary school and below	rural	Never	no	yes	no	28.9392	2.33333	1	Q3	8	Q3	60
211176221001	no	7	30	female	71	Married	Elementary school and below	rural	Current	no	yes	no	28.1737	2.33333	0.5	Q3	8	Q3	60
211176212001	no	6	60	male	61	Married	High school	rural	Current	>1m	no	no	19.6381	2	1	Q2	6	Q3	60
211176212002	no	7	60	female	54	Married	Elementary school and below	rural	Former	>1m	no	no	21.045	2.33333	1	Q3	8	Q3	60
211176219001	no	6	60	female	60	Non-married	Elementary school and below	rural	Former	no	no	no	30.1854	2	1	Q2	6	Q3	60
211176222001	no	5	0	female	57	Married	Elementary school and below	rural	Never	no	no	no	22.9083	1.66667	0	Q1	4	Q1	0
211176216001	no	6	60	male	69	Married	Elementary school and below	rural	Current	no	no	no	19.874	2	1	Q2	6	Q3	60
211176209001	no	1	30	male	57	Non-married	Elementary school and below	rural	Former	>1m	yes	no	19.3606	0.333333	0.5	Q1	4	Q3	60
211176202001	no	2	0	female	76	Non-married	Elementary school and below	rural	Never	no	no	no	18.304	0.666667	0	Q1	4	Q1	0
211176206001	no	8	10	female	61	Married	Elementary school and below	rural	Never	no	yes	yes	22.5786	2.66667	0.166667	Q3	8	Q3	60
211176213002	no	9	60	female	60	Married	Elementary school and below	rural	Never	no	no	no	21.3101	3	1	Q4	9	Q3	60
211176213001	yes	8	60	male	60	Married	Elementary school and below	rural	Never	<1m	no	no	22.1971	2.66667	1	Q3	8	Q3	60
211176217001	no	4	60	female	70	Non-married	Elementary school and below	rural	Current	no	yes	yes	19.7863	1.33333	1	Q1	4	Q3	60
211176327001	no	9	30	female	53	Married	Elementary school and below	urban	Never	no	yes	no	24.7134	3	0.5	Q4	9	Q3	60
211176317002	no	4	30	male	59	Married	High school	urban	Never	>1m	no	no	23.939	1.33333	0.5	Q1	4	Q3	60
211176314001	no	7	60	male	47	Married	Elementary school and below	urban	Current	no	yes	no	30.5946	2.33333	1	Q3	8	Q3	60
211176304001	no	6	0	male	73	Married	High school	urban	Current	>1m	no	no	17.4893	2	0	Q2	6	Q1	0
211176304002	no	8	0	female	65	Married	Elementary school and below	urban	Former	no	no	no	26.629	2.66667	0	Q3	8	Q1	0
211176309002	no	8	90	male	52	Married	Elementary school and below	urban	Never	>1m	no	no	25.7858	2.66667	1.5	Q3	8	Q4	120
211176320002	no	3	0	female	63	Married	Elementary school and below	urban	Never	<1m	yes	no	21.0696	1	0	Q1	4	Q1	0
211176321002	no	4	0	female	54	Married	Elementary school and below	urban	Current	no	yes	no	25.9317	1.33333	0	Q1	4	Q1	0
211176324002	no	8	0	female	46	Married	Elementary school and below	urban	Never	no	no	no	21.1064	2.66667	0	Q3	8	Q1	0
211176316002	no	2	0	female	84	Married	Elementary school and below	urban	Current	no	yes	no	20.928	0.666667	0	Q1	4	Q1	0
211176325001	no	6	0	female	48	Married	Elementary school and below	urban	Never	no	yes	no	25.7051	2	0	Q2	6	Q1	0
211176318002	no	8	60	male	58	Married	Elementary school and below	urban	Never	>1m	yes	no	25.2681	2.66667	1	Q3	8	Q3	60
211176318001	no	8	60	female	56	Married	Elementary school and below	urban	Never	no	no	no	23.552	2.66667	1	Q3	8	Q3	60
211176313002	no	7	0	male	54	Married	High school	urban	Former	no	yes	no	28.4138	2.33333	0	Q3	8	Q1	0
211176313001	no	6	0	female	55	Married	Elementary school and below	urban	Current	no	no	no	22.1772	2	0	Q2	6	Q1	0
211176311001	no	7	0	female	58	Married	Elementary school and below	urban	Former	no	no	no	26.563	2.33333	0	Q3	8	Q1	0
211176312002	no	7	0	male	48	Married	Elementary school and below	urban	Never	no	no	no	26.5449	2.33333	0	Q3	8	Q1	0
211176312001	no	6	0	female	46	Married	High school	urban	Never	no	no	no	24.5333	2	0	Q2	6	Q1	0
211176308001	no	6	0	male	45	divorced	Elementary school and below	urban	Current	>1m	no	no	26.0132	2	0	Q2	6	Q1	0
211176319002	no	9	60	male	50	Married	High school	urban	Current	>1m	no	no	24.4924	3	1	Q4	9	Q3	60
211176319001	no	8	10	female	47	Married	High school	urban	Never	no	no	no	29.9536	2.66667	0.166667	Q3	8	Q3	60
211176307001	yes	5	0	male	72	Married	Elementary school and below	urban	Never	>1m	no	no	22.4104	1.66667	0	Q1	4	Q1	0
211176301002	no	5	0	female	63	Married	High school	urban	Never	no	yes	no	30.8252	1.66667	0	Q1	4	Q1	0
211176305001	no	3	0	male	72	Married	Elementary school and below	urban	Current	no	no	no	19.7412	1	0	Q1	4	Q1	0
211176305002	no	2	0	female	71	Married	Elementary school and below	urban	Current	no	no	no	21.6203	0.666667	0	Q1	4	Q1	0
211176303001	no	8	0	female	74	Married	Elementary school and below	urban	Never	no	no	no	18.0446	2.66667	0	Q3	8	Q1	0
211176315002	no	7	0	male	67	Married	Elementary school and below	urban	Never	no	no	no	21.5505	2.33333	0	Q3	8	Q1	0
211176315001	no	7	180	female	62	Married	Elementary school and below	urban	Current	no	yes	yes	24.0665	2.33333	3	Q3	8	Q4	120
211176323001	no	8	60	male	73	Married	Elementary school and below	urban	Current	>1m	yes	no	17.0614	2.66667	1	Q3	8	Q3	60
211176302001	no	6	0	male	60	Married	Elementary school and below	urban	Current	>1m	no	no	25.4865	2	0	Q2	6	Q1	0
211176302002	no	7	0	female	61	Married	Elementary school and below	urban	Current	no	no	no	19.9933	2.33333	0	Q3	8	Q1	0
211176328001	no	5	0	female	47	Married	Elementary school and below	urban	Never	no	yes	yes	25.2825	1.66667	0	Q1	4	Q1	0
211154227002	no	8	120	male	55	Married	High school	urban	Current	>1m	yes	no	21.4638	2.66667	2	Q3	8	Q4	120
211154227001	no	8	60	female	51	Married	High school	urban	Never	no	yes	no	27.86	2.66667	1	Q3	8	Q3	60
211154208001	no	7	90	male	49	Married	High school	urban	Current	>1m	no	no	22.9103	2.33333	1.5	Q3	8	Q4	120
211154208002	no	8	30	female	50	Married	High school	urban	Never	no	no	no	25.4524	2.66667	0.5	Q3	8	Q3	60
211154218001	no	8	60	male	85	Married	Elementary school and below	urban	Never	no	yes	no	19.3315	2.66667	1	Q3	8	Q3	60
211154218002	no	8	60	female	80	Married	Elementary school and below	urban	Never	no	no	no	19.7712	2.66667	1	Q3	8	Q3	60
211154215001	no	7	60	male	66	Married	High school	urban	Never	no	no	no	23.2086	2.33333	1	Q3	8	Q3	60
211154215002	no	5	30	female	65	Married	High school	urban	Never	no	no	yes	21.6432	1.66667	0.5	Q1	4	Q3	60
211154222001	no	3	0	female	72	Non-married	Elementary school and below	urban	Never	no	yes	no	26.4504	1	0	Q1	4	Q1	0
211154223001	no	8	0	male	52	Married	High school	urban	Current	>1m	no	no	21.895	2.66667	0	Q3	8	Q1	0
211154223002	no	8	30	female	51	Married	High school	urban	Never	no	no	yes	22.8439	2.66667	0.5	Q3	8	Q3	60
211154228001	no	4	20	male	69	Married	High school	urban	Current	>1m	no	no	27.9769	1.33333	0.333333	Q1	4	Q3	60
211154228002	no	8	20	female	71	Married	Elementary school and below	urban	Never	no	yes	yes	29.482	2.66667	0.333333	Q3	8	Q3	60
211154201002	no	8	60	male	61	Married	Elementary school and below	urban	Never	no	yes	no	22.4422	2.66667	1	Q3	8	Q3	60
211154201001	no	8	0	female	58	Married	Elementary school and below	urban	Former	no	yes	no	27.4992	2.66667	0	Q3	8	Q1	0
211154214001	no	6	60	male	75	Married	High school	urban	Current	no	no	no	18.5479	2	1	Q2	6	Q3	60
211154214002	yes	5	120	female	78	Married	Elementary school and below	urban	Current	no	no	no	19.0434	1.66667	2	Q1	4	Q4	120
211154209001	no	6	20	female	60	Non-married	Elementary school and below	urban	Current	>1m	yes	no	22.9669	2	0.333333	Q2	6	Q3	60
211154213001	no	6	30	female	69	Married	Elementary school and below	urban	Current	no	yes	no	20.182	2	0.5	Q2	6	Q3	60
211154204002	no	8	60	female	60	Married	Elementary school and below	urban	Former	no	yes	no	23.0043	2.66667	1	Q3	8	Q3	60
211154205001	no	5	30	female	72	Married	Elementary school and below	urban	Current	no	yes	no	17.3513	1.66667	0.5	Q1	4	Q3	60
211154226001	no	7	4	male	59	Married	High school	urban	Former	>1m	yes	no	23.7441	2.33333	0.0666667	Q3	8	Q3	60
211154211001	no	6	60	male	81	Non-married	Elementary school and below	urban	Current	>1m	no	no	29.5987	2	1	Q2	6	Q3	60
211154101001	no	8	30	female	63	Non-married	High school	urban	Never	no	no	no	23.4766	2.66667	0.5	Q3	8	Q3	60
211154107001	no	7	0	male	51	Married	High school	urban	Current	>1m	no	no	19.9891	2.33333	0	Q3	8	Q1	0
211154107002	no	8	120	female	51	Married	High school	urban	Never	no	yes	no	23.5134	2.66667	2	Q3	8	Q4	120
211154103001	no	7	60	male	47	Married	High school	urban	Never	>1m	no	no	25.791	2.33333	1	Q3	8	Q3	60
211154103002	no	8	30	female	49	Married	college and higher	urban	Never	no	no	no	24.1043	2.66667	0.5	Q3	8	Q3	60
211154110002	no	8	60	male	68	Married	High school	urban	Former	no	yes	no	25.3491	2.66667	1	Q3	8	Q3	60
211154104002	no	9	30	male	75	Married	Elementary school and below	urban	Never	no	yes	yes	22.9639	3	0.5	Q4	9	Q3	60
211154104001	no	6	30	female	70	Married	Elementary school and below	urban	Former	no	yes	no	22.8918	2	0.5	Q2	6	Q3	60
211154119002	no	4	120	female	58	Married	High school	urban	Never	no	yes	no	21.5184	1.33333	2	Q1	4	Q4	120
211154119001	no	8	0	male	60	Married	Elementary school and below	urban	Current	<1m	no	no	43.1713	2.66667	0	Q3	8	Q1	0
211154117001	no	8	70	male	63	Married	High school	urban	Never	>1m	yes	no	26.6188	2.66667	1.16667	Q3	8	Q4	120
211154117002	no	8	60	female	61	Married	Elementary school and below	urban	Current	no	no	no	27.9636	2.66667	1	Q3	8	Q3	60
211154325001	no	8	120	male	77	Married	Elementary school and below	rural	Never	no	yes	no	42.9762	2.66667	2	Q3	8	Q4	120
211154314002	no	6	60	male	57	Married	High school	rural	Never	>1m	yes	no	21.7082	2	1	Q2	6	Q3	60
211154322002	no	2	10	male	54	Married	Elementary school and below	rural	Current	>1m	no	no	19.0502	0.666667	0.166667	Q1	4	Q3	60
211154322001	no	6	0	female	52	Married	Elementary school and below	rural	Never	no	no	no	26.5137	2	0	Q2	6	Q1	0
211154324002	no	7	60	male	48	Married	Elementary school and below	rural	Current	<1m	no	yes	23.2727	2.33333	1	Q3	8	Q3	60
211154324001	no	7	30	female	48	Married	Elementary school and below	rural	Current	no	no	no	22.354	2.33333	0.5	Q3	8	Q3	60
211154316001	no	8	60	male	52	Married	High school	rural	Current	>1m	yes	yes	30.173	2.66667	1	Q3	8	Q3	60
211154316002	no	7	60	female	52	Married	Elementary school and below	rural	Never	no	yes	no	26.0774	2.33333	1	Q3	8	Q3	60
211154305001	no	7	0	male	61	Married	High school	rural	Current	>1m	yes	no	26.1067	2.33333	0	Q3	8	Q1	0
211154305002	no	8	15	female	60	Married	Elementary school and below	rural	Never	no	no	yes	31.3767	2.66667	0.25	Q3	8	Q3	60
211154312001	no	8	10	male	60	Married	Elementary school and below	rural	Never	>1m	no	no	20.6781	2.66667	0.166667	Q3	8	Q3	60
211154312002	no	6	30	female	60	Married	Elementary school and below	rural	Never	no	no	no	20.041	2	0.5	Q2	6	Q3	60
211154306001	no	8	60	female	57	Married	Elementary school and below	rural	Never	no	no	no	19.7807	2.66667	1	Q3	8	Q3	60
211154313002	no	8	40	male	54	Married	Elementary school and below	rural	Current	no	no	no	22.1208	2.66667	0.666667	Q3	8	Q3	60
211154313001	no	6	30	female	51	Married	Elementary school and below	rural	Never	no	no	no	28.2534	2	0.5	Q2	6	Q3	60
211154320002	no	6	60	male	56	Married	Elementary school and below	rural	Current	>1m	no	no	22.0673	2	1	Q2	6	Q3	60
211154326002	no	12	120	male	45	Married	Elementary school and below	rural	Current	>1m	no	no	27.2608	4	2	Q4	9	Q4	120
211154326001	no	10	120	female	45	Married	High school	rural	Never	no	yes	no	26.6269	3.33333	2	Q4	9	Q4	120
211154307002	no	6	60	male	49	Married	High school	rural	Current	>1m	yes	yes	25.2002	2	1	Q2	6	Q3	60
211154307001	no	6	60	female	48	Married	Elementary school and below	rural	Current	>1m	no	no	19.9864	2	1	Q2	6	Q3	60
211154308002	no	6	0	male	78	Married	High school	rural	Current	<1m	yes	no	23.4944	2	0	Q2	6	Q1	0
211154317002	no	8	60	male	48	Married	Elementary school and below	rural	Current	no	no	no	24.6479	2.66667	1	Q3	8	Q3	60
211154302002	no	8	120	male	53	Married	Elementary school and below	rural	Former	>1m	yes	no	25.4276	2.66667	2	Q3	8	Q4	120
211154302001	no	7	30	female	54	Married	Elementary school and below	rural	Never	<1m	no	no	21.6423	2.33333	0.5	Q3	8	Q3	60
211154301002	no	6	0	male	55	Married	High school	rural	Current	>1m	no	no	28.0115	2	0	Q2	6	Q1	0
211154301001	no	8	0	female	57	Married	Elementary school and below	rural	Never	no	no	no	28.3016	2.66667	0	Q3	8	Q1	0
211154328002	no	4	90	female	59	Married	Elementary school and below	rural	Never	no	yes	no	24.1806	1.33333	1.5	Q1	4	Q4	120
211154311001	no	6	25	female	55	Non-married	High school	rural	Never	no	yes	yes	28.0584	2	0.416667	Q2	6	Q3	60
211154309001	no	6	120	female	54	Married	Elementary school and below	rural	Current	no	no	yes	19.55	2	2	Q2	6	Q4	120
211154329002	no	8	1	male	63	Married	Elementary school and below	rural	Never	no	yes	no	33.5779	2.66667	0.0166667	Q3	8	Q2	1
211154329001	no	8	90	female	65	Married	Elementary school and below	rural	Current	no	yes	no	20.7083	2.66667	1.5	Q3	8	Q4	120
211154327002	no	7	60	male	71	Married	Elementary school and below	rural	Current	>1m	yes	no	18.9394	2.33333	1	Q3	8	Q3	60
144016316002	no	6	0	male	59	Married	High school	urban	Current	>1m	no	no	34.8101	2	0	Q2	6	Q1	0
144016315001	no	5	30	male	57	Married	High school	urban	Former	>1m	no	no	23.4898	1.66667	0.5	Q1	4	Q3	60
144016315002	no	3	0	female	47	Married	High school	urban	Current	no	no	no	16.4325	1	0	Q1	4	Q1	0
144016311001	no	7	90	female	55	Non-married	High school	urban	Current	>1m	yes	no	26.1393	2.33333	1.5	Q3	8	Q4	120
144016323002	no	7	0	male	47	Married	High school	urban	Never	<1m	yes	no	25.4899	2.33333	0	Q3	8	Q1	0
144016323001	no	7	0	female	48	Married	High school	urban	Never	no	no	no	22.7306	2.33333	0	Q3	8	Q1	0
144016322001	no	6	0	female	53	divorced	High school	urban	Current	>1m	yes	no	24.4326	2	0	Q2	6	Q1	0
144016313001	no	6	120	male	69	Married	High school	urban	Current	<1m	yes	no	25.1488	2	2	Q2	6	Q4	120
144016320001	no	7	60	male	55	Married	Elementary school and below	urban	Never	no	yes	no	22.7601	2.33333	1	Q3	8	Q3	60
144016304001	no	7	30	male	50	Married	High school	urban	Never	>1m	no	no	23.6828	2.33333	0.5	Q3	8	Q3	60
144016306002	no	4	0	female	46	Married	High school	urban	Never	no	no	no	24.0692	1.33333	0	Q1	4	Q1	0
144016318001	no	6	35	female	72	Non-married	Elementary school and below	urban	Never	no	no	no	20.678	2	0.583333	Q2	6	Q3	60
144016317001	no	8	120	male	56	Married	High school	urban	Current	>1m	no	no	25.3251	2.66667	2	Q3	8	Q4	120
144016317002	no	9	0	female	54	Married	High school	urban	Never	no	no	no	19.9314	3	0	Q4	9	Q1	0
144016321001	no	6	60	female	73	Non-married	Elementary school and below	urban	Never	no	no	no	21.5114	2	1	Q2	6	Q3	60
144016307001	no	6	0	male	46	Married	High school	urban	Never	>1m	no	no	19.3713	2	0	Q2	6	Q1	0
144016307002	no	7	0	female	46	Married	High school	urban	Never	no	no	no	23.9705	2.33333	0	Q3	8	Q1	0
144016105002	no	7	0	male	57	Married	High school	urban	Never	>1m	no	yes	23.276	2.33333	0	Q3	8	Q1	0
144016105001	no	6	60	female	56	Married	High school	urban	Never	no	yes	no	31.0651	2	1	Q2	6	Q3	60
144016116002	no	6	60	female	56	Married	High school	urban	Never	no	yes	no	23.5014	2	1	Q2	6	Q3	60
144016115001	no	7	0	male	61	Married	High school	urban	Never	no	yes	no	22.2832	2.33333	0	Q3	8	Q1	0
144016111001	no	8	60	male	69	Married	High school	urban	Former	>1m	no	no	26.1154	2.66667	1	Q3	8	Q3	60
144016108002	no	5	0	female	45	Married	High school	urban	Never	>1m	no	no	21.4326	1.66667	0	Q1	4	Q1	0
144016119002	yes	8	0	male	45	Married	High school	urban	Current	>1m	no	no	24.7026	2.66667	0	Q3	8	Q1	0
144016114002	no	5	0	female	59	Married	Elementary school and below	urban	Never	no	no	yes	25.2825	1.66667	0	Q1	4	Q1	0
144016117001	no	4	0	female	58	Married	High school	urban	Never	no	no	no	30.4158	1.33333	0	Q1	4	Q1	0
144016104002	no	6	0	male	54	Married	High school	urban	Current	>1m	yes	no	27.9528	2	0	Q2	6	Q1	0
142403109001	no	6	0	female	55	Married	Elementary school and below	urban	Never	no	no	no	21.8717	2	0	Q2	6	Q1	0
142403108002	no	7	30	male	61	Married	High school	urban	Current	no	no	no	24.2575	2.33333	0.5	Q3	8	Q3	60
142403108001	no	6	60	female	61	Married	Elementary school and below	urban	Never	no	no	no	27.6535	2	1	Q2	6	Q3	60
142403102001	no	6	60	female	72	Non-married	Elementary school and below	urban	Never	no	no	no	30.4882	2	1	Q2	6	Q3	60
142403120002	no	7	30	male	46	Married	High school	urban	Current	>1m	yes	no	27.3543	2.33333	0.5	Q3	8	Q3	60
142403104002	no	7	0	female	54	Married	High school	urban	Never	no	no	no	24.0079	2.33333	0	Q3	8	Q1	0
142403104001	no	6	60	male	54	Married	High school	urban	Current	<1m	yes	no	21.4319	2	1	Q2	6	Q3	60
142403112002	no	7	0	female	52	Married	High school	urban	Never	no	yes	no	37.2612	2.33333	0	Q3	8	Q1	0
142403121001	no	5	0	male	64	Married	High school	urban	Former	>1m	no	no	25.6072	1.66667	0	Q1	4	Q1	0
142403121002	no	7	0	female	64	Married	High school	urban	Never	no	no	no	17.7904	2.33333	0	Q3	8	Q1	0
142403115002	no	8	0	female	47	Married	High school	urban	Never	no	no	no	23.5135	2.66667	0	Q3	8	Q1	0
142403111002	no	5	60	female	60	Married	Elementary school and below	urban	Never	no	yes	no	35.1292	1.66667	1	Q1	4	Q3	60
142403111001	no	6	0	male	62	Married	Elementary school and below	urban	Never	>1m	no	no	26.514	2	0	Q2	6	Q1	0
142403117001	no	8	30	male	55	divorced	High school	urban	Never	no	yes	no	25.7761	2.66667	0.5	Q3	8	Q3	60
142403110001	no	8	120	male	68	Married	High school	urban	Current	>1m	no	no	24.3526	2.66667	2	Q3	8	Q4	120
142403114002	no	8	10	male	62	Married	Elementary school and below	urban	Never	>1m	no	no	27.5501	2.66667	0.166667	Q3	8	Q3	60
142403114001	no	3	0	female	60	Married	Elementary school and below	urban	Never	no	yes	yes	24.4743	1	0	Q1	4	Q1	0
142403107002	no	6	0	female	59	Married	Elementary school and below	urban	Never	no	no	no	28.4434	2	0	Q2	6	Q1	0
142403107001	no	6	30	male	57	Married	Elementary school and below	urban	Never	no	no	no	21.4745	2	0.5	Q2	6	Q3	60
142403118002	no	9	60	female	51	Married	High school	urban	Never	no	no	no	29.1424	3	1	Q4	9	Q3	60
142403105001	no	6	30	male	50	divorced	High school	urban	Never	no	yes	no	18.5519	2	0.5	Q2	6	Q3	60
142403304002	no	8	0	female	64	Married	High school	urban	Never	no	yes	no	32.2335	2.66667	0	Q3	8	Q1	0
142403310001	no	6	60	male	62	Married	High school	urban	Never	no	no	no	23.8233	2	1	Q2	6	Q3	60
142403310002	no	6	0	female	59	Married	High school	urban	Never	no	yes	no	22.9829	2	0	Q2	6	Q1	0
142403303002	no	5	30	male	56	Married	High school	urban	Never	no	no	yes	21.175	1.66667	0.5	Q1	4	Q3	60
142403303001	no	4	0	female	56	Married	Elementary school and below	urban	Never	no	yes	no	23.7575	1.33333	0	Q1	4	Q1	0
142403307001	no	6	0	female	48	Married	High school	urban	Never	no	no	no	28.5142	2	0	Q2	6	Q1	0
142403307002	no	6	0	male	51	Married	High school	urban	Current	no	no	no	22.8538	2	0	Q2	6	Q1	0
142403308001	no	7	0	female	75	Non-married	Elementary school and below	urban	Never	<1m	no	no	21.3778	2.33333	0	Q3	8	Q1	0
142403306001	no	6	60	male	64	Married	Elementary school and below	urban	Never	no	yes	yes	26.2625	2	1	Q2	6	Q3	60
142403306002	no	3	0	female	64	Married	Elementary school and below	urban	Never	no	yes	yes	26.4292	1	0	Q1	4	Q1	0
142403305001	no	4	80	male	67	Married	Elementary school and below	urban	Never	no	no	no	23.7805	1.33333	1.33333	Q1	4	Q4	120
142403305002	no	10	60	female	68	Married	Elementary school and below	urban	Former	no	no	no	17.5115	3.33333	1	Q4	9	Q3	60
142403212001	no	6	60	female	56	Married	High school	urban	Never	no	no	no	23.3709	2	1	Q2	6	Q3	60
142403204002	no	5	0	female	55	Married	Elementary school and below	urban	Never	no	no	no	28.8316	1.66667	0	Q1	4	Q1	0
142403207001	no	4	0	female	58	divorced	High school	urban	Never	no	yes	no	24.5378	1.33333	0	Q1	4	Q1	0
142403213001	no	6	0	female	46	Married	High school	urban	Current	no	no	no	21.8409	2	0	Q2	6	Q1	0
142403208001	no	4	0	female	60	Married	High school	urban	Never	no	no	no	29.2086	1.33333	0	Q1	4	Q1	0
142403209001	no	6	60	male	67	Married	High school	urban	Current	>1m	yes	no	22.7682	2	1	Q2	6	Q3	60
142403209002	no	6	0	female	67	Married	Elementary school and below	urban	Never	no	no	no	25.6086	2	0	Q2	6	Q1	0
142403205001	yes	6	0	female	57	Non-married	Elementary school and below	urban	Never	no	yes	no	23.5659	2	0	Q2	6	Q1	0
141154122001	no	6	60	male	64	Non-married	Elementary school and below	rural	Current	no	yes	yes	28.9296	2	1	Q2	6	Q3	60
141154118001	no	5	0	female	67	Non-married	Elementary school and below	rural	Never	no	yes	yes	28.7609	1.66667	0	Q1	4	Q1	0
141154119002	no	8	60	male	73	Married	Elementary school and below	rural	Former	>1m	yes	yes	29.4627	2.66667	1	Q3	8	Q3	60
141154119001	no	2	0	female	68	Married	Elementary school and below	rural	Former	no	yes	no	23.8426	0.666667	0	Q1	4	Q1	0
141154101002	no	6	120	male	60	Married	Elementary school and below	rural	Current	>1m	no	no	20.8055	2	2	Q2	6	Q4	120
141154112001	no	7	0	female	59	Married	Elementary school and below	rural	Never	no	yes	no	24.5422	2.33333	0	Q3	8	Q1	0
141154106001	no	5	120	male	56	Married	High school	rural	Current	>1m	yes	yes	22.8813	1.66667	2	Q1	4	Q4	120
141154107001	no	8	0	male	45	Married	High school	rural	Never	no	no	yes	28.2604	2.66667	0	Q3	8	Q1	0
141154109001	no	6	30	male	59	Married	college and higher	rural	Never	>1m	no	no	21.0179	2	0.5	Q2	6	Q3	60
141154102002	no	6	0	male	51	Married	High school	rural	Current	>1m	no	no	23.7221	2	0	Q2	6	Q1	0
141154102001	no	6	0	female	50	Married	Elementary school and below	rural	Current	no	no	yes	32.1328	2	0	Q2	6	Q1	0
141154121001	no	7	60	female	69	Non-married	Elementary school and below	rural	Former	no	yes	no	27.0242	2.33333	1	Q3	8	Q3	60
141154114002	no	9	0	female	49	Married	High school	rural	Never	no	no	no	20.4726	3	0	Q4	9	Q1	0
141154110002	no	8	60	male	46	Married	High school	rural	Current	>1m	no	no	23.0085	2.66667	1	Q3	8	Q3	60
141154110001	no	10	60	female	48	Married	Elementary school and below	rural	Never	no	no	no	26.0701	3.33333	1	Q4	9	Q3	60
141154113002	no	6	60	male	49	Married	High school	rural	Current	<1m	yes	yes	31.0732	2	1	Q2	6	Q3	60
141154113001	no	5	60	female	49	Married	Elementary school and below	rural	Never	<1m	yes	no	26.5397	1.66667	1	Q1	4	Q3	60
141154105002	no	4	0	female	60	Married	Elementary school and below	rural	Never	no	no	no	23.6209	1.33333	0	Q1	4	Q1	0
141154105001	no	7	0	male	64	Married	Elementary school and below	rural	Current	no	no	no	20.5496	2.33333	0	Q3	8	Q1	0
141154117002	no	5	0	male	65	Married	Elementary school and below	rural	Current	>1m	no	no	23.3203	1.66667	0	Q1	4	Q1	0
141154117001	no	7	60	female	58	Married	Elementary school and below	rural	Current	no	yes	no	24.6609	2.33333	1	Q3	8	Q3	60
141154103001	no	6	120	female	70	Non-married	Elementary school and below	rural	Never	<1m	yes	no	24.3505	2	2	Q2	6	Q4	120
141154204001	no	6	0	male	50	Married	High school	urban	Current	>1m	no	yes	28.4276	2	0	Q2	6	Q1	0
141154204002	no	7	0	female	49	Married	High school	urban	Never	<1m	no	no	25.2519	2.33333	0	Q3	8	Q1	0
141154216001	no	5	0	female	49	Non-married	High school	urban	Never	no	no	no	20.5793	1.66667	0	Q1	4	Q1	0
141154206001	no	7	0	female	49	divorced	High school	urban	Never	no	no	yes	21.7081	2.33333	0	Q3	8	Q1	0
141154212002	no	6	60	male	65	Married	college and higher	urban	Never	>1m	no	no	23.6546	2	1	Q2	6	Q3	60
141154212001	no	6	0	female	67	Married	college and higher	urban	Never	no	no	no	25.0862	2	0	Q2	6	Q1	0
141154213001	no	5	0	female	46	Married	High school	urban	Never	no	no	no	30.7306	1.66667	0	Q1	4	Q1	0
141154324001	no	7	60	male	64	Married	Elementary school and below	rural	Current	>1m	no	yes	22.0699	2.33333	1	Q3	8	Q3	60
141154303002	no	6	0	female	67	Married	Elementary school and below	rural	Never	no	yes	yes	29.5326	2	0	Q2	6	Q1	0
141154303001	no	8	120	male	78	Married	Elementary school and below	rural	Never	no	no	no	21.6823	2.66667	2	Q3	8	Q4	120
141154310002	yes	8	0	male	58	Married	Elementary school and below	rural	Current	no	yes	no	26.4392	2.66667	0	Q3	8	Q1	0
141154310001	no	3	0	female	58	Married	Elementary school and below	rural	Never	no	yes	yes	26.1509	1	0	Q1	4	Q1	0
141154306001	no	8	0	female	48	Married	High school	rural	Never	<1m	no	no	25.4222	2.66667	0	Q3	8	Q1	0
141154327002	no	6	0	female	49	Married	High school	rural	Current	<1m	yes	no	27.3402	2	0	Q2	6	Q1	0
141154326002	no	6	60	male	51	Married	Elementary school and below	rural	Current	>1m	yes	no	24.6921	2	1	Q2	6	Q3	60
141154314002	no	7	0	male	54	Married	Elementary school and below	rural	Current	>1m	no	no	24.488	2.33333	0	Q3	8	Q1	0
141154314001	no	8	30	female	52	Married	Elementary school and below	rural	Never	no	no	no	26.942	2.66667	0.5	Q3	8	Q3	60
141154301001	no	6	60	male	58	Married	High school	rural	Never	<1m	yes	no	20.1226	2	1	Q2	6	Q3	60
141154301002	no	7	60	female	56	Married	Elementary school and below	rural	Never	no	yes	yes	24.5308	2.33333	1	Q3	8	Q3	60
141154304002	no	10	0	female	47	Married	Elementary school and below	rural	Never	no	no	no	20.0219	3.33333	0	Q4	9	Q1	0
141154320001	no	8	1	male	72	Married	Elementary school and below	rural	Current	>1m	no	no	22.2575	2.66667	0.0166667	Q3	8	Q2	1
141154320002	no	4	0	female	70	Married	Elementary school and below	rural	Never	no	yes	no	19.6882	1.33333	0	Q1	4	Q1	0
141154323001	no	8	0	male	56	Married	High school	rural	Current	>1m	no	no	22.3258	2.66667	0	Q3	8	Q1	0
141154322001	no	6	0	male	59	Married	Elementary school and below	rural	Current	>1m	yes	no	20.5632	2	0	Q2	6	Q1	0
141154322002	no	6	0	female	58	Married	Elementary school and below	rural	Never	no	no	no	22.9999	2	0	Q2	6	Q1	0
141154316001	no	8	0	female	60	Married	Elementary school and below	rural	Current	<1m	no	no	17.9302	2.66667	0	Q3	8	Q1	0
141154316002	no	6	0	male	66	Married	Elementary school and below	rural	Never	no	no	no	19.2496	2	0	Q2	6	Q1	0
141154321001	no	8	0	female	77	Non-married	Elementary school and below	rural	Former	>1m	no	no	21.4038	2.66667	0	Q3	8	Q1	0
141154319001	no	6	0	male	45	Married	High school	rural	Former	<1m	no	no	28.4665	2	0	Q2	6	Q1	0
141154315002	no	5	60	male	53	Married	Elementary school and below	rural	Current	>1m	yes	no	23.9218	1.66667	1	Q1	4	Q3	60
141154315001	no	7	60	female	49	Married	High school	rural	Never	no	no	yes	29.1392	2.33333	1	Q3	8	Q3	60
141154308002	no	6	30	female	48	Married	High school	rural	Never	<1m	no	no	31.1067	2	0.5	Q2	6	Q3	60
141154305002	no	4	0	female	63	Married	Elementary school and below	rural	Never	no	no	no	24.8828	1.33333	0	Q1	4	Q1	0
141154325002	no	5	0	male	61	Married	Elementary school and below	rural	Current	>1m	yes	yes	25.7756	1.66667	0	Q1	4	Q1	0
141154325001	no	7	0	female	63	Married	Elementary school and below	rural	Never	no	no	no	25.418	2.33333	0	Q3	8	Q1	0
141154307001	no	5	0	male	49	Married	High school	rural	Current	<1m	yes	no	20.7636	1.66667	0	Q1	4	Q1	0
141154312001	no	7	60	male	51	Married	Elementary school and below	rural	Current	no	no	no	23.1614	2.33333	1	Q3	8	Q3	60
141154312002	no	8	30	female	51	Married	Elementary school and below	rural	Never	no	no	no	29.4688	2.66667	0.5	Q3	8	Q3	60
141154302001	no	8	100	female	63	Married	Elementary school and below	rural	Never	no	yes	no	21.9237	2.66667	1.66667	Q3	8	Q4	120
141154313001	yes	8	60	female	66	Non-married	Elementary school and below	rural	Current	no	yes	no	21.9146	2.66667	1	Q3	8	Q3	60
145528208002	no	4	0	male	59	Married	High school	urban	Never	>1m	yes	no	26.436	1.33333	0	Q1	4	Q1	0
145528208001	no	6	60	female	61	Married	Elementary school and below	urban	Never	no	yes	yes	29.5525	2	1	Q2	6	Q3	60
145528104002	no	6	0	male	79	Married	High school	urban	Former	>1m	no	yes	27.6488	2	0	Q2	6	Q1	0
145528104001	no	8	30	female	75	Married	High school	urban	Never	no	yes	yes	25.0761	2.66667	0.5	Q3	8	Q3	60
184037202001	no	8	0	female	48	Married	Elementary school and below	urban	Never	>1m	no	no	48.0692	2.66667	0	Q3	8	Q1	0
184037201001	no	5	0	female	58	Married	Elementary school and below	urban	Never	no	yes	yes	60.9663	1.66667	0	Q1	4	Q1	0
184037302001	no	8	60	female	56	Married	High school	urban	Never	no	yes	no	24.2606	2.66667	1	Q3	8	Q3	60
184037304001	no	6	60	female	52	Married	High school	urban	Never	<1m	yes	yes	30.4272	2	1	Q2	6	Q3	60
184037311002	no	8	120	male	61	Married	High school	urban	Never	<1m	no	no	28.2509	2.66667	2	Q3	8	Q4	120
184037321001	no	8	0	male	67	Married	High school	urban	Current	no	yes	no	22.3569	2.66667	0	Q3	8	Q1	0
184037115002	no	8	60	male	53	Married	High school	urban	Current	>1m	yes	no	23.1772	2.66667	1	Q3	8	Q3	60
184037114001	no	5	0	male	51	divorced	High school	urban	Never	>1m	no	no	23.75	1.66667	0	Q1	4	Q1	0
184037105002	no	7	0	female	56	Married	High school	urban	Never	<1m	yes	no	27.7296	2.33333	0	Q3	8	Q1	0
184037105001	no	7	0	male	65	Married	Elementary school and below	urban	Current	no	no	no	23.7669	2.33333	0	Q3	8	Q1	0
184037111002	no	8	0	female	72	Married	Elementary school and below	urban	Never	<1m	yes	no	25.7553	2.66667	0	Q3	8	Q1	0
184037108002	no	7	30	female	68	Married	High school	urban	Never	no	yes	no	24.4336	2.33333	0.5	Q3	8	Q3	60
184037112002	no	8	0	male	61	Married	High school	urban	Never	<1m	no	no	19.3817	2.66667	0	Q3	8	Q1	0
184037112001	no	7	30	female	56	Married	High school	urban	Never	no	no	no	21.9805	2.33333	0.5	Q3	8	Q3	60
184037106001	no	7	0	female	54	Married	Elementary school and below	urban	Never	no	yes	no	29.245	2.33333	0	Q3	8	Q1	0
184037103002	no	7	0	female	57	Married	Elementary school and below	urban	Never	no	no	no	19.3548	2.33333	0	Q3	8	Q1	0
111154208002	no	8	0	female	67	Married	Elementary school and below	urban	Never	no	yes	no	23.6324	2.66667	0	Q3	8	Q1	0
110131304001	no	10	0	female	83	Non-married	Elementary school and below	rural	Never	no	yes	no	21.0671	3.33333	0	Q4	9	Q1	0
110131302001	no	8	0	female	76	Non-married	Elementary school and below	rural	Never	no	no	no	20.3386	2.66667	0	Q3	8	Q1	0
110131303001	no	5	0	female	70	Married	Elementary school and below	rural	Never	no	no	no	21.5886	1.66667	0	Q1	4	Q1	0
110131309001	no	5	0	male	56	Married	Elementary school and below	rural	Never	>1m	yes	no	20.7795	1.66667	0	Q1	4	Q1	0
110131309002	no	6	0	female	54	Married	Elementary school and below	rural	Never	no	no	no	25.1004	2	0	Q2	6	Q1	0
110131312002	no	7	0	female	54	Married	Elementary school and below	rural	Never	no	no	no	23.3958	2.33333	0	Q3	8	Q1	0
110131312001	no	7	60	male	52	Married	High school	rural	Current	no	no	no	25.1339	2.33333	1	Q3	8	Q3	60
110131301002	no	8	0	male	58	Married	Elementary school and below	rural	Current	no	no	no	19.7337	2.66667	0	Q3	8	Q1	0
110131310001	no	8	0	male	66	Married	Elementary school and below	rural	Never	no	no	no	21.6868	2.66667	0	Q3	8	Q1	0
110131310002	no	8	0	female	67	Married	Elementary school and below	rural	Never	no	yes	yes	25.1564	2.66667	0	Q3	8	Q1	0
110131314001	no	7	20	male	56	Married	Elementary school and below	rural	Never	>1m	yes	no	26.4463	2.33333	0.333333	Q3	8	Q3	60
110131314002	no	6	0	female	54	Married	Elementary school and below	rural	Never	no	no	no	27.7186	2	0	Q2	6	Q1	0
110131319001	no	7	0	male	56	Married	Elementary school and below	rural	Current	>1m	yes	no	23.521	2.33333	0	Q3	8	Q1	0
110131319002	no	8	0	female	54	Married	Elementary school and below	rural	Never	no	no	no	25.2516	2.66667	0	Q3	8	Q1	0
110131323001	no	5	0	female	57	Married	Elementary school and below	rural	Never	no	no	no	20.6331	1.66667	0	Q1	4	Q1	0
[truncated: 8,226 more rows]
